# Supplementary material for: Integrated microRNA and mRNA analysis in the pathogenic filamentous fungus Trichophyton rubrum
Source: BMC Genomics. 2018 Dec 14;19:933. doi: 10.1186/s12864-018-5316-3 (PMC6295003; doi:10.1186/s12864-018-5316-3)
Supplement: Supplementary file 3 — Table S2. The predicted target genes of milRNAs. (XLSX 824 kb) [file 12864_2018_5316_MOESM3_ESM.xlsx]

## Sheet: Table S2A
Table S2. The predicted target genes of milRNAs.
Table S2A. Annotation of the predicted target genes.
Target gene	Function annotation	Subcellular localization	Biological process			Cellular component			Molecular function			KEGG KO No.	KEGG Gene	KEGG pathway	IPR ID	Domain description
TERG_00002	Mis12-Mtw1 domain protein	nucleus	single-organism process; cellular process;	single-organism cellular process;	chromosome segregation; cell division;	macromolecular complex; cell; organelle;	organelle part; non-membrane-bounded organelle; cell part; protein complex;	intracellular organelle; intracellular non-membrane-bounded organelle; condensed chromosome, centromeric region; intracellular organelle part; intracellular part; condensed chromosome kinetochore; chromosomal part; condensed chromosome; chromosomal region; intracellular; chromosome; chromosome, centromeric region; kinetochore; MIS12/MIND type complex;				K11560
TERG_00004	Alanine aminotransferase, putative	mitochondria	metabolic process;	biosynthetic process;					catalytic activity; binding;	organic cyclic compound binding; heterocyclic compound binding; ion binding; cofactor binding;	anion binding; pyridoxal phosphate binding;	K00814	GPT; alanine transaminase [EC:2.6.1.2]	ko00220 Arginine biosynthesis; ko00710 Carbon fixation in photosynthetic organisms; ko01230 Biosynthesis of amino acids; ko01100 Metabolic pathways; ko01210 2-Oxocarboxylic acid metabolism; ko01120 Microbial metabolism in diverse environments; ko01200 Carbon metabolism; ko00620 Pyruvate metabolism;	IPR004839; IPR015424; IPR015421;	"Aminotransferase, class I/classII; Pyridoxal phosphate-dependent transferase; Pyridoxal phosphate-dependent transferase, major region, subdomain 1; "
TERG_00008	hypothetical protein
TERG_00009	Peroxisomal biogenesis factor (PEX11), putative	mitochondria	cellular process; cellular component organization or biogenesis;	cellular component organization;	peroxisome organization; organelle organization; organelle fission; peroxisome fission;	membrane; cell; organelle;	organelle part; cell part; membrane part; whole membrane; membrane-bounded organelle;	intracellular organelle; microbody membrane; intrinsic component of peroxisomal membrane; peroxisomal part; bounding membrane of organelle; organelle membrane; peroxisome; cytoplasm; intracellular organelle part; intrinsic component of membrane; microbody part; intracellular part; integral component of membrane; peroxisomal membrane; intracellular membrane-bounded organelle; integral component of…
TERG_00012	Chromatin remodeling complex subunit (Rsc9), putative	nucleus	biological regulation;	regulation of biological process;	regulation of cellular process; regulation of gene expression; regulation of transcription, DNA-templated; regulation of cellular biosynthetic process; regulation of primary metabolic process; regulation of macromolecule metabolic process; regulation of nucleobase-containing compound metabolic process; regulation of macromolecule biosynthetic process; regulation of cellular metabolic process; reg…				binding;	organic cyclic compound binding; heterocyclic compound binding;	DNA binding; nucleic acid binding;	K11763			IPR003150; IPR016024;	DNA-binding RFX-type winged-helix domain; Armadillo-type fold;
TERG_00013	ThiJ/PfpI family protein	cytoplasm													IPR002818; IPR029062;	DJ-1/PfpI; Class I glutamine amidotransferase-like;
TERG_00014	hypothetical protein
TERG_00015	Stromal membrane-associated protein	mitochondria							molecular function regulator;	enzyme regulator activity;	enzyme activator activity; nucleoside-triphosphatase regulator activity; GTPase activator activity; GTPase regulator activity;	K12486	SMAP; stromal membrane-associated protein	ko04144 Endocytosis;
TERG_00018	hypothetical protein
TERG_00019	mitochondrial Rho GTPase 1	cytoplasm	single-organism process; signaling; response to stimulus; cellular process; biological regulation; cellular component organization or biogenesis;	single organism signaling; cellular component organization; cellular response to stimulus; regulation of biological process; cell communication;	regulation of cellular process; intracellular signal transduction; small GTPase mediated signal transduction; signal transduction; organelle organization; mitochondrion organization;	membrane; cell; organelle;	outer membrane; organelle part; membrane part; cell part; whole membrane; membrane-bounded organelle;	organelle membrane; cytoplasm; intrinsic component of mitochondrial outer membrane; intrinsic component of membrane; intracellular part; mitochondrial membrane part; mitochondrial envelope; integral component of organelle membrane; integral component of mitochondrial outer membrane; intracellular; organelle outer membrane; intrinsic component of mitochondrial membrane; intracellular organelle; mi…	catalytic activity; binding;	ion binding; hydrolase activity; organic cyclic compound binding; heterocyclic compound binding; carbohydrate derivative binding; small molecule binding;	nucleoside phosphate binding; nucleoside binding; hydrolase activity, acting on acid anhydrides; nucleotide binding; nucleoside-triphosphatase activity; ribonucleoside binding; pyrophosphatase activity; ribonucleotide binding; GTPase activity; purine ribonucleoside binding; cation binding; metal ion binding; anion binding; purine ribonucleotide binding; guanyl ribonucleotide binding; purine nucle…	K07870	"RHOT1; Ras homolog gene family, member T1"""	ko04214 Apoptosis - fly;	IPR013566; IPR027417; IPR002048; IPR011992; IPR020860; IPR013567;	"EF hand associated, type-1; P-loop containing nucleoside triphosphate hydrolase; EF-hand domain; EF-hand domain pair; MIRO domain; EF hand associated, type-2; "
TERG_00020	DUF500 and SH3 domain protein	cytoskeleton	actin cortical patch localization			cytoskeleton			binding; protein binding; actin filament binding	protein binding;					IPR001452; IPR033643; IPR007461;	"SH3 domain; Ysc84-like 1, SYLF domain; Ysc84 actin-binding domain; "
TERG_00021	Telomere silencing protein Zds1, putative	nucleus													IPR013941;	"Protein Zds1, C-terminal; "
TERG_00023	Probable catabolite repression protein creC	nucleus							binding;	protein binding;					IPR017986; IPR015943; IPR024977;	"WD40-repeat-containing domain; WD40/YVTN repeat-like-containing domain; Anaphase-promoting complex subunit 4, WD40 domain; "
TERG_00024	ADP-ribosylation factor 6	mitochondria	single-organism process; signaling; response to stimulus; cellular process; biological regulation;	single organism signaling; cellular response to stimulus; regulation of biological process; cell communication;	regulation of cellular process; signal transduction; intracellular signal transduction; small GTPase mediated signal transduction;	cell;	cell part;	intracellular;	binding;	ion binding; organic cyclic compound binding; heterocyclic compound binding; carbohydrate derivative binding; small molecule binding;	nucleoside phosphate binding; nucleoside binding; nucleotide binding; ribonucleoside binding; ribonucleotide binding; purine ribonucleoside binding; anion binding; purine ribonucleotide binding; purine nucleoside binding; guanyl ribonucleotide binding; guanyl nucleotide binding; GTP binding; purine nucleotide binding; purine ribonucleoside triphosphate binding;	K07941	ARF6; ADP-ribosylation factor 6	ko04666 Fc gamma R-mediated phagocytosis; ko04144 Endocytosis; ko04072 Phospholipase D signaling pathway; ko04014 Ras signaling pathway;	IPR005225; IPR027417;	Small GTP-binding protein domain; P-loop containing nucleoside triphosphate hydrolase;
TERG_00026	hypothetical protein
TERG_00027	hypothetical protein
TERG_00032	Mitochondrial dicarboxylate carrier protein, putative	mitochondria	localization;	establishment of localization;	transport; transmembrane transport;							K15104			IPR023395;	Mitochondrial carrier domain;
TERG_00033	hypothetical protein
TERG_00034	mRNA cap guanine-N7 methyltransferase	nucleus										K00565	RNMT; mRNA (guanine-N7-)-methyltransferase [EC:2.1.1.56]	ko03015 mRNA surveillance pathway;	IPR029063; IPR004971;	S-adenosyl-L-methionine-dependent methyltransferase; mRNA (guanine-N(7))-methyltransferase domain;
TERG_00035	C3HC zinc finger domain protein	mitochondria				organelle; cell;	cell part; membrane-bounded organelle;	intracellular membrane-bounded organelle; intracellular organelle; nucleus; intracellular; intracellular part;	binding;	ion binding;	cation binding; metal ion binding; zinc ion binding; transition metal ion binding;				IPR012935; IPR013909;	"Zinc finger, C3HC-like; Nuclear-interacting partner of ALK/Rsm1-like; "
TERG_00036	hypothetical protein
TERG_00037	hypothetical protein
TERG_00038	hypothetical protein
TERG_00041	hypothetical protein
TERG_00042	hypothetical protein
TERG_00051	T-complex protein 1 subunit epsilon	cytoplasm	cellular process;	protein folding;					binding;	ion binding; protein binding; organic cyclic compound binding; heterocyclic compound binding; carbohydrate derivative binding; small molecule binding;	ATP binding; nucleoside phosphate binding; nucleoside binding; nucleotide binding; ribonucleoside binding; ribonucleotide binding; purine ribonucleoside binding; anion binding; purine ribonucleotide binding; unfolded protein binding; adenyl ribonucleotide binding; adenyl nucleotide binding; purine nucleoside binding; purine nucleotide binding; purine ribonucleoside triphosphate binding;	K09497			IPR027410; IPR027409; IPR027413;	TCP-1-like chaperonin intermediate domain; GroEL-like apical domain; GroEL-like equatorial domain;
TERG_00057	RING finger protein, putative	nucleus							binding;	protein binding; ion binding;	cation binding; metal ion binding; zinc ion binding; transition metal ion binding;				IPR001841; IPR013083;	"Zinc finger, RING-type; Zinc finger, RING/FYVE/PHD-type; "
TERG_00058	Oxidoreductase, FAD-binding, putative	cytoplasm	single-organism process; metabolic process;	single-organism metabolic process;	oxidation-reduction process;				catalytic activity; binding;	ion binding; cofactor binding; oxidoreductase activity; heterocyclic compound binding; organic cyclic compound binding; carbohydrate derivative binding; small molecule binding;	pyridoxamine-phosphate oxidase activity; nucleoside phosphate binding; nucleotide binding; ribonucleotide binding; anion binding; oxidoreductase activity, acting on the CH-NH2 group of donors; oxidoreductase activity, acting on the CH-NH2 group of donors, oxygen as acceptor; FMN binding;				IPR017927; IPR012349; IPR017938; IPR011576;	"Ferredoxin reductase-type FAD-binding domain; FMN-binding split barrel; Riboflavin synthase-like beta-barrel; Pyridoxamine 5'-phosphate oxidase-like, FMN-binding domain; "
TERG_00061	GDP-mannose pyrophosphorylase A	mitochondria	metabolic process;	biosynthetic process;					catalytic activity;	transferase activity;	nucleotidyltransferase activity; transferase activity, transferring phosphorus-containing groups;	K00966	GMPP; mannose-1-phosphate guanylyltransferase [EC:2.7.7.13]	ko00051 Fructose and mannose metabolism; ko01110 Biosynthesis of secondary metabolites; ko01100 Metabolic pathways; ko00520 Amino sugar and nucleotide sugar metabolism;	IPR011004; IPR029044; IPR005835;	Trimeric LpxA-like; Nucleotide-diphospho-sugar transferases; Nucleotidyl transferase domain;
TERG_00062	hypothetical protein
TERG_00063	lysine-tRNA ligase	nucleus	single-organism process; metabolic process; cellular process;	biosynthetic process; cellular metabolic process; organic substance metabolic process; single-organism cellular process; nitrogen compound metabolic process; primary metabolic process; single-organism metabolic process;	peptide metabolic process; cellular aromatic compound metabolic process; cellular protein metabolic process; organonitrogen compound biosynthetic process; tRNA aminoacylation; cellular amino acid metabolic process; heterocycle metabolic process; nucleobase-containing compound metabolic process; cellular nitrogen compound metabolic process; tRNA aminoacylation for protein translation; protein meta…	cell;	cell part;	intracellular part; intracellular; cytoplasm;	catalytic activity; binding;	ligase activity; ion binding; organic cyclic compound binding; heterocyclic compound binding; carbohydrate derivative binding; small molecule binding;	ligase activity, forming aminoacyl-tRNA and related compounds; ATP binding; nucleoside phosphate binding; ligase activity, forming carbon-oxygen bonds; nucleoside binding; nucleotide binding; lysine-tRNA ligase activity; ribonucleoside binding; ribonucleotide binding; nucleic acid binding; purine ribonucleoside binding; anion binding; purine ribonucleotide binding; adenyl ribonucleotide binding; …	K04567	"KARS; lysyl-tRNA synthetase, class II [EC:6.1.1.6]"""	ko00970 Aminoacyl-tRNA biosynthesis;	IPR004364; IPR012340; IPR004365; IPR018149; IPR006195;	"Aminoacyl-tRNA synthetase, class II (D/K/N); Nucleic acid-binding, OB-fold; OB-fold nucleic acid binding domain, AA-tRNA synthetase-type; Lysyl-tRNA synthetase, class II, C-terminal; Aminoacyl-tRNA synthetase, class II; "
TERG_00067	hypothetical protein	nucleus
TERG_00069	fumarylacetoacetase	mitochondria	single-organism process; metabolic process; cellular process;	single-organism cellular process; nitrogen compound metabolic process; primary metabolic process; cellular metabolic process; organic substance metabolic process; single-organism metabolic process;	aromatic amino acid family metabolic process; cellular aromatic compound metabolic process; small molecule metabolic process; organic cyclic compound metabolic process; cellular amino acid metabolic process; carboxylic acid metabolic process; organic acid metabolic process; oxoacid metabolic process; organonitrogen compound metabolic process;				catalytic activity;	hydrolase activity;	fumarylacetoacetase activity; hydrolase activity, acting on acid carbon-carbon bonds, in ketonic substances; hydrolase activity, acting on acid carbon-carbon bonds;	K01555	FAH; fumarylacetoacetase [EC:3.7.1.2]	ko00643 Styrene degradation; ko01120 Microbial metabolism in diverse environments; ko01100 Metabolic pathways; ko00350 Tyrosine metabolism;	IPR015377; IPR011234;	"Fumarylacetoacetase, N-terminal; Fumarylacetoacetase, C-terminal-related; "
TERG_00070	maleylacetoacetate isomerase	mitochondria	single-organism process; metabolic process; cellular process;	single-organism cellular process; nitrogen compound metabolic process; primary metabolic process; cellular metabolic process; organic substance metabolic process; single-organism metabolic process;	aromatic amino acid family metabolic process; cellular aromatic compound metabolic process; small molecule metabolic process; organic cyclic compound metabolic process; cellular amino acid metabolic process; carboxylic acid metabolic process; organic acid metabolic process; oxoacid metabolic process; organonitrogen compound metabolic process;	cell;	cell part;	intracellular part; intracellular; cytoplasm;	catalytic activity; binding;	protein binding;		K01800	maiA; maleylacetoacetate isomerase [EC:5.2.1.2]	ko00643 Styrene degradation; ko01120 Microbial metabolism in diverse environments; ko01100 Metabolic pathways; ko00350 Tyrosine metabolism;	IPR004046; IPR010987; IPR034330; IPR012336; IPR004045;	"Glutathione S-transferase, C-terminal; Glutathione S-transferase, C-terminal-like; Glutathione S-transferases, class Zeta , C-terminal; Thioredoxin-like fold; Glutathione S-transferase, N-terminal; "
TERG_00071	hypothetical protein
TERG_00073	NADH-dependent flavin oxidoreductase, putative	cyto_nucl	single-organism process; metabolic process;	single-organism metabolic process;	oxidation-reduction process;				catalytic activity; binding;	organic cyclic compound binding; heterocyclic compound binding; carbohydrate derivative binding; ion binding; cofactor binding; oxidoreductase activity; small molecule binding;	nucleoside phosphate binding; ribonucleotide binding; anion binding; nucleotide binding; FMN binding;				IPR001155; IPR013785;	"NADH:flavin oxidoreductase/NADH oxidase, N-terminal; Aldolase-type TIM barrel; "
TERG_00076	Aminotransferase, putative	mitochondria	metabolic process;	biosynthetic process;					catalytic activity; binding;	organic cyclic compound binding; heterocyclic compound binding; ion binding; cofactor binding;	anion binding; pyridoxal phosphate binding;	K00652	bioF; 8-amino-7-oxononanoate synthase [EC:2.3.1.47]	ko01100 Metabolic pathways; ko00780 Biotin metabolism;	IPR015424; IPR004839; IPR015421; IPR015422;	"Pyridoxal phosphate-dependent transferase; Aminotransferase, class I/classII; Pyridoxal phosphate-dependent transferase, major region, subdomain 1; Pyridoxal phosphate-dependent transferase, major region, subdomain 2; "
TERG_00082	hypothetical protein
TERG_00083	hypothetical protein
TERG_00085	hypothetical protein
TERG_00089	methylthioadenosine phosphorylase	cytoskeleton	single-organism process; metabolic process; cellular process;	single-organism cellular process; nitrogen compound metabolic process; primary metabolic process; cellular metabolic process; organic substance metabolic process; single-organism metabolic process;	nucleoside metabolic process; cellular aromatic compound metabolic process; small molecule metabolic process; organic cyclic compound metabolic process; heterocycle metabolic process; nucleobase-containing compound metabolic process; carbohydrate derivative metabolic process; cellular nitrogen compound metabolic process; glycosyl compound metabolic process; nucleobase-containing small molecule me…				catalytic activity;	transferase activity;	purine-nucleoside phosphorylase activity; transferase activity, transferring pentosyl groups; S-methyl-5-thioadenosine phosphorylase activity; transferase activity, transferring glycosyl groups;	K00772	mtaP; 5'-methylthioadenosine phosphorylase [EC:2.4.2.28]	ko00270 Cysteine and methionine metabolism; ko01100 Metabolic pathways;	IPR000845;	Nucleoside phosphorylase domain;
TERG_00090	hypothetical protein
TERG_00091	hypothetical protein
TERG_00092	Ubiquinone biosynthesis methlytransferase Coq5, putative	mitochondria							catalytic activity;	transferase activity;	transferase activity, transferring one-carbon groups; methyltransferase activity;	K06127	"COQ5; 2-methoxy-6-polyprenyl-1,4-benzoquinol methylase [EC:2.1.1.201]"""	ko00130 Ubiquinone and other terpenoid-quinone biosynthesis; ko01110 Biosynthesis of secondary metabolites; ko01100 Metabolic pathways;	IPR029063;	S-adenosyl-L-methionine-dependent methyltransferase;
TERG_00093	2-oxoisovalerate dehydrogenase complex alpha subunit, putative	mitochondria	metabolic process;						catalytic activity;	oxidoreductase activity;	oxidoreductase activity, acting on the aldehyde or oxo group of donors, disulfide as acceptor; oxidoreductase activity, acting on the aldehyde or oxo group of donors;	K00166	BCKDHA; 2-oxoisovalerate dehydrogenase E1 component alpha subunit [EC:1.2.4.4]	ko01130 Biosynthesis of antibiotics; ko03460 Fanconi anemia pathway; ko01110 Biosynthesis of secondary metabolites; ko01100 Metabolic pathways; ko00640 Propanoate metabolism;	IPR001017; IPR029061;	"Dehydrogenase, E1 component; Thiamin diphosphate-binding fold; "
TERG_00096	NADH-ubiquinone oxidoreductase 30.4 kDa subunit, mitochondrial	mitochondria	single-organism process; metabolic process;	single-organism metabolic process;	oxidation-reduction process;				catalytic activity;	oxidoreductase activity;	oxidoreductase activity, acting on NAD(P)H; NADH dehydrogenase activity; NADH dehydrogenase (quinone) activity; NADH dehydrogenase (ubiquinone) activity; oxidoreductase activity, acting on NAD(P)H, quinone or similar compound as acceptor;	K03936	NDUFS3; NADH dehydrogenase (ubiquinone) Fe-S protein 3 [EC:1.6.5.3 1.6.99.3]	ko05010 Alzheimer's disease; ko00190 Oxidative phosphorylation; ko01100 Metabolic pathways; ko05016 Huntington's disease; ko04932 Non-alcoholic fatty liver disease (NAFLD); ko05012 Parkinson's disease;	IPR001268;	"NADH:ubiquinone oxidoreductase, 30kDa subunit; "
TERG_00098	hypothetical protein
TERG_00102	fumarate hydratase, class II	mitochondria	single-organism process; metabolic process; cellular process;	single-organism cellular process; primary metabolic process; cellular metabolic process; organic substance metabolic process; single-organism metabolic process;	dicarboxylic acid metabolic process; tricarboxylic acid metabolic process; oxidation-reduction process; small molecule metabolic process; tricarboxylic acid cycle; cellular respiration; citrate metabolic process; generation of precursor metabolites and energy; aerobic respiration; energy derivation by oxidation of organic compounds; carboxylic acid metabolic process; organic acid metabolic proces…	macromolecular complex; cell;	cell part; protein complex;	intracellular; cytoplasm; intracellular part; tricarboxylic acid cycle enzyme complex; cytoplasmic part;	catalytic activity;	lyase activity;	hydro-lyase activity; fumarate hydratase activity; carbon-oxygen lyase activity;	K01679	"E4.2.1.2B; fumarate hydratase, class II [EC:4.2.1.2]"""	ko00720 Carbon fixation pathways in prokaryotes; ko01130 Biosynthesis of antibiotics; ko01110 Biosynthesis of secondary metabolites; ko01100 Metabolic pathways; ko00020 Citrate cycle (TCA cycle); ko01120 Microbial metabolism in diverse environments; ko05200 Pathways in cancer; ko01200 Carbon metabolism; ko05211 Renal cell carcinoma; ko00620 Pyruvate metabolism;	IPR024083; IPR008948; IPR022761; IPR018951;	"Fumarase/histidase, N-terminal; L-Aspartase-like; Fumarate lyase, N-terminal; Fumarase C, C-terminal; "
TERG_00106	60S ribosomal protein L24	nucleus										K02896	RP-L24e; large subunit ribosomal protein L24e	ko03010 Ribosome;
TERG_00108	WD repeat protein	nucleus							binding;	protein binding;					IPR017986; IPR015943;	WD40-repeat-containing domain; WD40/YVTN repeat-like-containing domain;
TERG_00109	Thioesterase family protein	mitochondria													IPR006683; IPR029069;	Thioesterase domain; HotDog domain;
TERG_00110	Ubiquitin C-terminal hydrolase, putative	cytoplasm	metabolic process; cellular process;	primary metabolic process; cellular metabolic process; organic substance metabolic process; catabolic process;	modification-dependent macromolecule catabolic process; protein modification by small protein removal; cellular macromolecule catabolic process; proteolysis involved in cellular protein catabolic process; cellular protein catabolic process; modification-dependent protein catabolic process; cellular protein metabolic process; ubiquitin-dependent protein catabolic process; protein modification by s…				catalytic activity; binding;	hydrolase activity; protein binding;	peptidase activity; thiol-dependent ubiquitinyl hydrolase activity; ubiquitin-like protein-specific protease activity; ubiquitinyl hydrolase activity; peptidase activity, acting on L-amino acid peptides; cysteine-type peptidase activity;	K11843			IPR029071; IPR001394; IPR028889; IPR000626;	"Ubiquitin-related domain; peptidase C19, ubiquitin carboxyl-terminal hydrolase; Ubiquitin specific protease domain; Ubiquitin domain; "
TERG_00112	hypothetical protein
TERG_00114	hypothetical protein
TERG_00118	C6 zinc finger domain protein	nucleus	biological regulation;	regulation of biological process;	regulation of cellular process; regulation of gene expression; regulation of transcription, DNA-templated; regulation of cellular biosynthetic process; regulation of primary metabolic process; regulation of macromolecule metabolic process; regulation of nucleobase-containing compound metabolic process; regulation of macromolecule biosynthetic process; regulation of cellular metabolic process; reg…	organelle; cell;	cell part; membrane-bounded organelle;	intracellular membrane-bounded organelle; intracellular organelle; nucleus; intracellular; intracellular part;	binding; nucleic acid binding transcription factor activity;	ion binding; transcription factor activity, sequence-specific DNA binding;	RNA polymerase II transcription factor activity, sequence-specific DNA binding; transition metal ion binding; metal ion binding; cation binding; zinc ion binding;				IPR001138;	Zn(2)-C6 fungal-type DNA-binding domain;
TERG_00119	CAMK/CAMKL/GIN4 protein kinase
TERG_00123	Ribonuclease P complex subunit Pop1, putative	mitochondria	metabolic process; cellular process;	nitrogen compound metabolic process; primary metabolic process; cellular metabolic process; organic substance metabolic process;	ncRNA processing; RNA processing; cellular aromatic compound metabolic process; organic cyclic compound metabolic process; RNA metabolic process; tRNA metabolic process; nucleic acid metabolic process; heterocycle metabolic process; nucleobase-containing compound metabolic process; tRNA 5'-leader removal; tRNA processing; cellular macromolecule metabolic process; gene expression; cellular nitroge…				catalytic activity;	hydrolase activity;	tRNA-specific ribonuclease activity; endonuclease activity, active with either ribo- or deoxyribonucleic acids and producing 5'-phosphomonoesters; ribonuclease P activity; hydrolase activity, acting on ester bonds; nuclease activity; endoribonuclease activity; endoribonuclease activity, producing 5'-phosphomonoesters; ribonuclease activity; endonuclease activity;	K01164	POP1; ribonuclease P/MRP protein subunit POP1 [EC:3.1.26.5]	ko03008 Ribosome biogenesis in eukaryotes; ko03013 RNA transport;	IPR012590; IPR009723;	"POPLD; Ribonuclease P/MRP, subunit POP1; "
TERG_00129	hypothetical protein
TERG_00130	Rab geranylgeranyl transferase escort protein, putative	mitochondria	single-organism process; signaling; response to stimulus; metabolic process; cellular process; biological regulation;	single organism signaling; cellular response to stimulus; regulation of biological process; cell communication; single-organism metabolic process;	regulation of cellular process; intracellular signal transduction; oxidation-reduction process; small GTPase mediated signal transduction; signal transduction;				catalytic activity; molecular function regulator;	enzyme regulator activity; oxidoreductase activity;	GDP-dissociation inhibitor activity; nucleoside-triphosphatase regulator activity; GTPase regulator activity;				IPR023753;	FAD/NAD(P)-binding domain;
TERG_00131	peptidyl-prolyl cis-trans isomerase-like 1	cytoskeleton	metabolic process; cellular process;	primary metabolic process; cellular metabolic process; organic substance metabolic process; protein folding;	cellular protein metabolic process; peptidyl-proline modification; protein peptidyl-prolyl isomerization; peptidyl-amino acid modification; cellular macromolecule metabolic process; cellular protein modification process; protein metabolic process; macromolecule metabolic process; macromolecule modification; protein modification process;				catalytic activity;	isomerase activity;	peptidyl-prolyl cis-trans isomerase activity; cis-trans isomerase activity;	K12733	PPIL1; peptidyl-prolyl cis-trans isomerase-like 1 [EC:5.2.1.8]	ko03040 Spliceosome;	IPR002130; IPR029000;	Cyclophilin-type peptidyl-prolyl cis-trans isomerase domain; Cyclophilin-like domain;
TERG_00135	hypothetical protein
TERG_00136	hypothetical protein
TERG_00139	hypothetical protein
TERG_00140	hypothetical protein	extracellular							binding;	protein binding;					IPR011048; IPR015943;	"Cytochrome cd1-nitrite reductase-like, haem d1 domain; WD40/YVTN repeat-like-containing domain; "
TERG_00141	hypothetical protein
TERG_00142	ATP synthase subunit E, putative	nucleus	single-organism process; localization;	establishment of localization; single-organism localization;	cation transmembrane transport; ion transmembrane transport; inorganic ion transmembrane transport; ATP hydrolysis coupled transmembrane transport; energy coupled proton transmembrane transport, against electrochemical gradient; hydrogen transport; proton transport; transport; transmembrane transport; cation transport; ion transport; ATP hydrolysis coupled proton transport; hydrogen ion transmemb…	macromolecular complex; membrane;	protein complex; membrane part;	proton-transporting two-sector ATPase complex, catalytic domain; membrane protein complex; proton-transporting two-sector ATPase complex;	catalytic activity; transporter activity;	substrate-specific transporter activity; hydrolase activity; transmembrane transporter activity;	active transmembrane transporter activity; ATPase coupled ion transmembrane transporter activity; ion transmembrane transporter activity; active ion transmembrane transporter activity; primary active transmembrane transporter activity; ATPase activity, coupled to transmembrane movement of ions, rotational mechanism; hydrolase activity, acting on acid anhydrides; monovalent inorganic cation transm…	K02150	ATPeV1E; V-type H+-transporting ATPase subunit E	ko05323 Rheumatoid arthritis; ko05120 Epithelial cell signaling in Helicobacter pylori infection; ko04721 Synaptic vesicle cycle; ko04966 Collecting duct acid secretion; ko04145 Phagosome; ko00190 Oxidative phosphorylation; ko01100 Metabolic pathways; ko05110 Vibrio cholerae infection;
TERG_00143	hypothetical protein	nucleus
TERG_00146	Phospholipid-transporting ATPase	plasma membrane	single-organism process; localization;	establishment of localization; single-organism localization; macromolecule localization;	lipid transport; organic substance transport; lipid localization; phospholipid transport; anion transport; transport; organophosphate ester transport; organic anion transport; ion transport; single-organism transport;	membrane;	membrane part;	intrinsic component of membrane; integral component of membrane;	catalytic activity; binding; transporter activity;	substrate-specific transporter activity; hydrolase activity; organic cyclic compound binding; heterocyclic compound binding; ion binding; carbohydrate derivative binding; small molecule binding;	nucleoside phosphate binding; lipid transporter activity; hydrolase activity, acting on acid anhydrides; ATPase activity; pyrophosphatase activity; ribonucleotide binding; ATPase activity, coupled to movement of substances; purine ribonucleoside binding; cation binding; anion binding; adenyl ribonucleotide binding; adenyl nucleotide binding; hydrolase activity, acting on acid anhydrides, in phosp…	K01530			IPR032630; IPR008250; IPR023299; IPR032631; IPR023214;	"P-type ATPase, C-terminal; P-type ATPase, A domain; P-type ATPase, cytoplasmic domain N; P-type ATPase, N-terminal; HAD-like domain; "
TERG_00148	hypothetical protein
TERG_00151	hypothetical protein
TERG_00153	Actin associated protein Wsp1, putative	nucleus							binding;	protein binding;	actin binding; cytoskeletal protein binding;	K05747	WAS; Wiskott-Aldrich syndrome protein	ko05231 Choline metabolism in cancer; ko04062 Chemokine signaling pathway; ko04810 Regulation of actin cytoskeleton; ko04666 Fc gamma R-mediated phagocytosis; ko04144 Endocytosis; ko05100 Bacterial invasion of epithelial cells; ko05132 Salmonella infection; ko05131 Shigellosis; ko05130 Pathogenic Escherichia coli infection; ko04520 Adherens junction;	IPR033927; IPR003124; IPR000095; IPR011993; IPR000697;	"WASP family, EVH1 domain; WH2 domain; CRIB domain; PH domain-like; WH1/EVH1 domain; "
TERG_00154	hypothetical protein
TERG_00155	eukaryotic translation initiation factor 1A, Y-chromosomal	nucleus	metabolic process; cellular process;	nitrogen compound metabolic process; biosynthetic process; primary metabolic process; cellular metabolic process; organic substance metabolic process;	peptide metabolic process; peptide biosynthetic process; cellular protein metabolic process; cellular amide metabolic process; organonitrogen compound biosynthetic process; organic substance biosynthetic process; cellular biosynthetic process; cellular nitrogen compound biosynthetic process; cellular macromolecule biosynthetic process; cellular macromolecule metabolic process; translational initi…				binding;	organic cyclic compound binding; heterocyclic compound binding;	RNA binding; translation factor activity, RNA binding; nucleic acid binding; translation initiation factor activity;	K03236	EIF1A; translation initiation factor 1A	ko03013 RNA transport;	IPR012340; IPR006196;	"Nucleic acid-binding, OB-fold; RNA-binding domain, S1, IF1 type; "
TERG_00158	hypothetical protein
TERG_00159	hypothetical protein
TERG_00160	hypothetical protein
TERG_00163	hypothetical protein
TERG_00165	hypothetical protein	nucleus										K15263
TERG_00166	NF-X1 finger transcription factor, putative	nucleus	biological regulation;	regulation of biological process;	regulation of cellular process; regulation of gene expression; regulation of transcription, DNA-templated; regulation of cellular biosynthetic process; regulation of primary metabolic process; regulation of macromolecule metabolic process; regulation of nucleobase-containing compound metabolic process; regulation of macromolecule biosynthetic process; regulation of cellular metabolic process; reg…	organelle; cell;	cell part; membrane-bounded organelle;	intracellular membrane-bounded organelle; intracellular organelle; nucleus; intracellular; intracellular part;	binding; nucleic acid binding transcription factor activity;	organic cyclic compound binding; heterocyclic compound binding; ion binding; transcription factor activity, sequence-specific DNA binding;	transition metal ion binding; nucleic acid binding; metal ion binding; cation binding; zinc ion binding;	K12236			IPR000967; IPR001374;	"Zinc finger, NF-X1-type; R3H domain; "
TERG_00168	hypothetical protein
TERG_00170	Mitochondrial large ribosomal subunit L49, putative	mitochondria	metabolic process; cellular process;	nitrogen compound metabolic process; biosynthetic process; primary metabolic process; cellular metabolic process; organic substance metabolic process;	peptide metabolic process; peptide biosynthetic process; cellular protein metabolic process; cellular amide metabolic process; organonitrogen compound biosynthetic process; organic substance biosynthetic process; cellular biosynthetic process; cellular nitrogen compound biosynthetic process; cellular macromolecule biosynthetic process; cellular macromolecule metabolic process; cellular nitrogen c…	organelle; macromolecular complex; cell;	cell part; ribonucleoprotein complex; non-membrane-bounded organelle;	ribosome; intracellular organelle; intracellular non-membrane-bounded organelle; intracellular; cytoplasm; intracellular part; intracellular ribonucleoprotein complex; cytoplasmic part;	structural molecule activity;	structural constituent of ribosome;		K17430
TERG_00172	hypothetical protein
TERG_00174	ATPase GET3	cytoplasm							catalytic activity; binding;	ion binding; hydrolase activity; organic cyclic compound binding; heterocyclic compound binding; carbohydrate derivative binding; small molecule binding;	ATP binding; nucleoside phosphate binding; nucleoside binding; hydrolase activity, acting on acid anhydrides; nucleotide binding; nucleoside-triphosphatase activity; ATPase activity; ribonucleoside binding; pyrophosphatase activity; ribonucleotide binding; purine ribonucleoside binding; anion binding; purine ribonucleotide binding; adenyl ribonucleotide binding; adenyl nucleotide binding; purine …	K01551			IPR027417; IPR025723;	P-loop containing nucleoside triphosphate hydrolase; Anion-transporting ATPase-like domain;
TERG_00176	hydroxyisourate hydrolase
TERG_00177	BZIP transcription factor (AtfA), putative	nucleus	biological regulation;	regulation of biological process;	regulation of cellular process; regulation of gene expression; regulation of transcription, DNA-templated; regulation of cellular biosynthetic process; regulation of primary metabolic process; regulation of macromolecule metabolic process; regulation of nucleobase-containing compound metabolic process; regulation of macromolecule biosynthetic process; regulation of cellular metabolic process; reg…				binding; nucleic acid binding transcription factor activity;	organic cyclic compound binding; heterocyclic compound binding; transcription factor activity, sequence-specific DNA binding;	DNA binding; nucleic acid binding; sequence-specific DNA binding;	K09051	SKO1; ATF/CREB family transcription factor	ko04011 MAPK signaling pathway - yeast;	IPR004827; IPR021755; IPR021756;	"Basic-leucine zipper domain; Transcription factor Aft1, HRA domain; Transcription factor Aft1, HRR domain; "
TERG_00178	hypothetical protein
TERG_00179	hypothetical protein
TERG_00181	nucleolar protein 58	cytoplasm										K14565	NOP58; nucleolar protein 58	ko03008 Ribosome biogenesis in eukaryotes;	IPR002687; IPR012974; IPR012976;	"Nop domain; NOP5, N-terminal; NOSIC; "
TERG_00184	Ribose-phosphate pyrophosphokinase	mitochondria	single-organism process; metabolic process; cellular process;	biosynthetic process; cellular metabolic process; organic substance metabolic process; single-organism cellular process; nitrogen compound metabolic process; primary metabolic process; single-organism metabolic process;	nucleoside metabolic process; nucleotide biosynthetic process; cellular aromatic compound metabolic process; nucleotide metabolic process; phosphate-containing compound metabolic process; heterocycle metabolic process; aromatic compound biosynthetic process; nucleobase-containing compound metabolic process; nucleoside phosphate metabolic process; carbohydrate derivative metabolic process; cellula…				catalytic activity; binding;	ion binding; transferase activity;	magnesium ion binding; ribose phosphate diphosphokinase activity; metal ion binding; cation binding; diphosphotransferase activity; transferase activity, transferring phosphorus-containing groups;	K00948	PRPS; ribose-phosphate pyrophosphokinase [EC:2.7.6.1]	ko00030 Pentose phosphate pathway; ko00230 Purine metabolism; ko01120 Microbial metabolism in diverse environments; ko01130 Biosynthesis of antibiotics; ko01200 Carbon metabolism; ko01110 Biosynthesis of secondary metabolites; ko01230 Biosynthesis of amino acids; ko01100 Metabolic pathways;	IPR000836; IPR029099; IPR029057;	"Phosphoribosyltransferase domain; Ribose-phosphate pyrophosphokinase, N-terminal domain; Phosphoribosyltransferase-like; "
TERG_00185	Ubiquitin-like protein (HubA), putative	nucleus													IPR029071;	Ubiquitin-related domain;
TERG_00186	hypothetical protein
TERG_00188	hypothetical protein
TERG_00190	ribosomal protein S15	mitochondria	metabolic process; cellular process;	nitrogen compound metabolic process; biosynthetic process; primary metabolic process; cellular metabolic process; organic substance metabolic process;	peptide metabolic process; peptide biosynthetic process; cellular protein metabolic process; cellular amide metabolic process; organonitrogen compound biosynthetic process; organic substance biosynthetic process; cellular biosynthetic process; cellular nitrogen compound biosynthetic process; cellular macromolecule biosynthetic process; cellular macromolecule metabolic process; cellular nitrogen c…	organelle; macromolecular complex; cell;	cell part; ribonucleoprotein complex; non-membrane-bounded organelle;	ribosome; intracellular organelle; intracellular non-membrane-bounded organelle; intracellular; cytoplasm; intracellular part; intracellular ribonucleoprotein complex; cytoplasmic part;	structural molecule activity;	structural constituent of ribosome;					IPR009068;	"S15/NS1, RNA-binding; "
TERG_00192	ATP-dependent rRNA helicase spb4	nucleus							binding;	ion binding; organic cyclic compound binding; heterocyclic compound binding; carbohydrate derivative binding; small molecule binding;	ATP binding; nucleoside phosphate binding; nucleoside binding; nucleotide binding; ribonucleoside binding; ribonucleotide binding; nucleic acid binding; purine ribonucleoside binding; anion binding; purine ribonucleotide binding; adenyl ribonucleotide binding; adenyl nucleotide binding; purine nucleoside binding; purine nucleotide binding; purine ribonucleoside triphosphate binding;	K14809			IPR011545; IPR014014; IPR025313; IPR027417; IPR014001; IPR001650;	"DEAD/DEAH box helicase domain; RNA helicase, DEAD-box type, Q motif; Domain of unknown function DUF4217; P-loop containing nucleoside triphosphate hydrolase; Helicase superfamily 1/2, ATP-binding domain; Helicase, C-terminal; "
TERG_00193	Phosphatidate cytidylyltransferase, putative	plasma membrane										K16368	DGK1; diacylglycerol kinase (CTP) [EC:2.7.1.174]	ko00564 Glycerophospholipid metabolism; ko01110 Biosynthesis of secondary metabolites; ko01100 Metabolic pathways;
TERG_00195	Actin-related protein RO7, putative	nucleus
TERG_00196	hypothetical protein
TERG_00197	hypothetical protein
TERG_00198	hypothetical protein
TERG_00199	serine/threonine protein kinase
TERG_00200	hypothetical protein
TERG_00205	Alpha-tubulin suppressor protein Aats1, putative	cytoplasm										K15462			IPR009091;	Regulator of chromosome condensation 1/beta-lactamase-inhibitor protein II;
TERG_00207	STE/STE11/BCK1 protein kinase	nucleus	metabolic process; cellular process;	primary metabolic process; cellular metabolic process; organic substance metabolic process;	phosphorylation; cellular protein metabolic process; phosphate-containing compound metabolic process; protein phosphorylation; phosphorus metabolic process; cellular macromolecule metabolic process; cellular protein modification process; protein metabolic process; macromolecule metabolic process; protein modification process; macromolecule modification;				catalytic activity; binding;	ion binding; organic cyclic compound binding; heterocyclic compound binding; carbohydrate derivative binding; transferase activity; small molecule binding;	ATP binding; nucleoside phosphate binding; phosphotransferase activity, alcohol group as acceptor; nucleoside binding; protein kinase activity; nucleotide binding; ribonucleoside binding; kinase activity; ribonucleotide binding; purine ribonucleoside binding; anion binding; purine ribonucleotide binding; adenyl ribonucleotide binding; adenyl nucleotide binding; purine nucleoside binding; transfer…	K11229	BCK1; mitogen-activated protein kinase kinase kinase [EC:2.7.11.1]	ko04139 Regulation of mitophagy - yeast; ko04011 MAPK signaling pathway - yeast;	IPR000719; IPR011009;	Protein kinase domain; Protein kinase-like domain;
TERG_00208	hypothetical protein
TERG_00212	Proteasome subunit alpha type	cytoplasm	metabolic process; cellular process;	primary metabolic process; cellular metabolic process; organic substance metabolic process; catabolic process;	modification-dependent macromolecule catabolic process; cellular macromolecule catabolic process; proteolysis involved in cellular protein catabolic process; cellular protein catabolic process; modification-dependent protein catabolic process; cellular protein metabolic process; ubiquitin-dependent protein catabolic process; organic substance catabolic process; protein catabolic process; macromol…	macromolecular complex; cell;	catalytic complex; cell part; protein complex;	proteasome core complex, alpha-subunit complex; proteasome complex; intracellular; proteasome core complex; intracellular part; peptidase complex; endopeptidase complex;	catalytic activity;	hydrolase activity;	endopeptidase activity; threonine-type endopeptidase activity; peptidase activity; threonine-type peptidase activity; peptidase activity, acting on L-amino acid peptides;	K02730	PSMA6; 20S proteasome subunit alpha 1 [EC:3.4.25.1]	ko03050 Proteasome;	IPR029055; IPR000426;	"Nucleophile aminohydrolases, N-terminal; Proteasome alpha-subunit, N-terminal domain; "
TERG_00213	hypothetical protein
TERG_00215	MFS peptide transporter Ptr2, putative	plasma membrane	localization;	establishment of localization;	transport; oligopeptide transport; organic substance transport; amide transport; peptide transport; nitrogen compound transport;	membrane;			transporter activity;			K03305			IPR020846;	Major facilitator superfamily domain;
TERG_00217	ubiquitin-40S ribosomal protein S27a	nucleus	metabolic process; cellular process;	nitrogen compound metabolic process; biosynthetic process; primary metabolic process; cellular metabolic process; organic substance metabolic process;	peptide metabolic process; peptide biosynthetic process; cellular protein metabolic process; cellular amide metabolic process; organonitrogen compound biosynthetic process; organic substance biosynthetic process; cellular biosynthetic process; cellular nitrogen compound biosynthetic process; cellular macromolecule biosynthetic process; cellular macromolecule metabolic process; cellular nitrogen c…	organelle; macromolecular complex; cell;	cell part; ribonucleoprotein complex; non-membrane-bounded organelle;	ribosome; intracellular organelle; intracellular non-membrane-bounded organelle; intracellular; cytoplasm; intracellular part; intracellular ribonucleoprotein complex; cytoplasmic part;	structural molecule activity; binding;	protein binding; structural constituent of ribosome;		K02977	RP-S27Ae; small subunit ribosomal protein S27Ae	ko03010 Ribosome;	IPR002906; IPR011332; IPR029071; IPR000626;	Ribosomal protein S27a; Zinc-binding ribosomal protein; Ubiquitin-related domain; Ubiquitin domain;
TERG_00218	hypothetical protein
TERG_00220	Vacuolar assembly protein, putative	cyto_nucl	localization;	macromolecule localization; establishment of localization; cellular localization;	establishment of protein localization; transport; intracellular transport; cellular macromolecule localization; establishment of localization in cell; vesicle-mediated transport; intracellular protein transport; organic substance transport; protein localization; cellular protein localization; protein transport;				binding;	protein binding;		K20184			IPR011990; IPR017986; IPR015943;	Tetratricopeptide-like helical domain; WD40-repeat-containing domain; WD40/YVTN repeat-like-containing domain;
TERG_00223	hypothetical protein
TERG_00225	Zinc metalloproteinase, putative	mitochondria													IPR001229;	Jacalin-like lectin domain;
TERG_00226	hypothetical protein
TERG_00227	hypothetical protein	mitochondria							binding;	protein binding;					IPR010987; IPR012336; IPR004045;	"Glutathione S-transferase, C-terminal-like; Thioredoxin-like fold; Glutathione S-transferase, N-terminal; "
TERG_00228	Probable chaperone protein Hsp31 homologue, putative	cytoplasm													IPR029062; IPR002818;	Class I glutamine amidotransferase-like; DJ-1/PfpI;
TERG_00229	hypothetical protein
TERG_00235	hypothetical protein
TERG_00237	Small nucleolar ribonucleoprotein complex subunit (SOF1), putative	nucleus	Ribosome biogenesis; rRNA processing			nucleus			Ribonucleoprotein; RNA-binding	protein binding;		K11806			IPR017986; IPR015943; IPR007287;	WD40-repeat-containing domain; WD40/YVTN repeat-like-containing domain; Sof1-like protein;
TERG_00240	DUF887 domain protein	plasma membrane				membrane;	membrane part;	intrinsic component of membrane; integral component of membrane;							IPR006634;	TRAM/LAG1/CLN8 homology domain;
TERG_00241	hypothetical protein	nucleus
TERG_00242	60S ribosomal protein L27	mitochondria	metabolic process; cellular process;	nitrogen compound metabolic process; biosynthetic process; primary metabolic process; cellular metabolic process; organic substance metabolic process;	peptide metabolic process; peptide biosynthetic process; cellular protein metabolic process; cellular amide metabolic process; organonitrogen compound biosynthetic process; organic substance biosynthetic process; cellular biosynthetic process; cellular nitrogen compound biosynthetic process; cellular macromolecule biosynthetic process; cellular macromolecule metabolic process; cellular nitrogen c…	organelle; macromolecular complex; cell;	cell part; ribonucleoprotein complex; non-membrane-bounded organelle;	ribosome; intracellular organelle; intracellular non-membrane-bounded organelle; intracellular; cytoplasm; intracellular part; intracellular ribonucleoprotein complex; cytoplasmic part;	structural molecule activity;	structural constituent of ribosome;		K02901	RP-L27e; large subunit ribosomal protein L27e	ko03010 Ribosome;	IPR008991; IPR014722;	Translation protein SH3-like domain; Ribosomal protein L2 domain 2;
TERG_00243	Pathogenesis associated protein Cap20, putative	cytoplasm
TERG_00246	CAIB/BAIF family enzyme	mitochondria							catalytic activity;			K18703			IPR023606;	CoA-transferase family III domain;
TERG_00247	riboflavin synthase, alpha subunit	cytoplasm	single-organism process; metabolic process;	single-organism metabolic process;	oxidation-reduction process;				catalytic activity;	oxidoreductase activity;		K00793	ribE; riboflavin synthase [EC:2.5.1.9]	ko01110 Biosynthesis of secondary metabolites; ko01100 Metabolic pathways; ko00740 Riboflavin metabolism;	IPR026017; IPR017938; IPR023366;	Lumazine-binding domain; Riboflavin synthase-like beta-barrel; ATP synthase subunit alpha-like domain;
TERG_00249	ATP-dependent rRNA helicase RRP3	nucleus							binding;	ion binding; organic cyclic compound binding; heterocyclic compound binding; carbohydrate derivative binding; small molecule binding;	ATP binding; nucleoside phosphate binding; nucleoside binding; nucleotide binding; ribonucleoside binding; ribonucleotide binding; nucleic acid binding; purine ribonucleoside binding; anion binding; purine ribonucleotide binding; adenyl ribonucleotide binding; adenyl nucleotide binding; purine nucleoside binding; purine nucleotide binding; purine ribonucleoside triphosphate binding;	K14777			IPR011545; IPR014014; IPR027417; IPR014001; IPR001650;	"DEAD/DEAH box helicase domain; RNA helicase, DEAD-box type, Q motif; P-loop containing nucleoside triphosphate hydrolase; Helicase superfamily 1/2, ATP-binding domain; Helicase, C-terminal; "
TERG_00250	N-acetylglucosamine-phosphate mutase	cytoplasm	metabolic process;	primary metabolic process; organic substance metabolic process;	carbohydrate metabolic process;				catalytic activity; binding;	isomerase activity; ion binding;	magnesium ion binding; phosphoacetylglucosamine mutase activity; intramolecular transferase activity, phosphotransferases; metal ion binding; cation binding; intramolecular transferase activity;	K01836	PGM3; phosphoacetylglucosamine mutase [EC:5.4.2.3]	ko01130 Biosynthesis of antibiotics; ko01100 Metabolic pathways; ko00520 Amino sugar and nucleotide sugar metabolism;	IPR005843; IPR016055; IPR005844;	"Alpha-D-phosphohexomutase, C-terminal; Alpha-D-phosphohexomutase, alpha/beta/alpha I/II/III; Alpha-D-phosphohexomutase, alpha/beta/alpha domain I; "
TERG_00252	hypothetical protein
TERG_00253	Histone H4 arginine methyltransferase RmtA	nucleus	mRNA export from nucleus; regulation of DNA-templated transcription; termination	primary metabolic process; cellular metabolic process; methylation; organic substance metabolic process;	cellular protein metabolic process; protein alkylation; protein methylation; macromolecule methylation; cellular macromolecule metabolic process; cellular protein modification process; protein metabolic process; macromolecule metabolic process; protein modification process; macromolecule modification;	nucleus			catalytic activity; methyltransferase activity;	transferase activity;	transferase activity, transferring one-carbon groups; methyltransferase activity;	K11434	PRMT1; type I protein arginine methyltransferase [EC:2.1.1.319]	ko04068 FoxO signaling pathway; ko04922 Glucagon signaling pathway;	IPR029063;	S-adenosyl-L-methionine-dependent methyltransferase;
TERG_00255	trimethyllysine dioxygenase	mitochondria	single-organism process; metabolic process; cellular process;	nitrogen compound metabolic process; biosynthetic process; cellular metabolic process; organic substance metabolic process; single-organism metabolic process;	oxidation-reduction process; ammonium ion metabolic process; amino-acid betaine biosynthetic process; organonitrogen compound biosynthetic process; carnitine biosynthetic process; organic substance biosynthetic process; amino-acid betaine metabolic process; cellular biosynthetic process; cellular nitrogen compound biosynthetic process; carnitine metabolic process; cellular nitrogen compound metab…				catalytic activity; binding;	ion binding; oxidoreductase activity; carbohydrate binding; small molecule binding;	vitamin binding; iron ion binding; L-ascorbic acid binding; organic acid binding; oxidoreductase activity, acting on paired donors, with incorporation or reduction of molecular oxygen; monosaccharide binding; oxidoreductase activity, acting on paired donors, with incorporation or reduction of molecular oxygen, 2-oxoglutarate as one donor, and incorporation of one atom each of oxygen into both don…	K00474	TMLHE; trimethyllysine dioxygenase [EC:1.14.11.8]	ko00310 Lysine degradation;	IPR010376; IPR003819;	Domain of unknown function DUF971; TauD/TfdA-like domain;
TERG_00256	26S protease regulatory subunit 6A	nucleus	metabolic process;	primary metabolic process; catabolic process; organic substance metabolic process;	organic substance catabolic process; protein catabolic process; macromolecule catabolic process; macromolecule metabolic process; protein metabolic process;	cell;	cell part;	intracellular part; intracellular; cytoplasm;	catalytic activity; binding;	ion binding; hydrolase activity; organic cyclic compound binding; heterocyclic compound binding; carbohydrate derivative binding; small molecule binding;	ATP binding; nucleoside phosphate binding; nucleoside binding; nucleotide binding; ribonucleoside binding; ribonucleotide binding; purine ribonucleoside binding; anion binding; purine ribonucleotide binding; adenyl ribonucleotide binding; adenyl nucleotide binding; purine nucleoside binding; purine nucleotide binding; purine ribonucleoside triphosphate binding;	K03065	PSMC3; 26S proteasome regulatory subunit T5	ko05169 Epstein-Barr virus infection; ko03050 Proteasome;	IPR003593; IPR003959; IPR027417;	"AAA+ ATPase domain; ATPase, AAA-type, core; P-loop containing nucleoside triphosphate hydrolase; "
TERG_00257	hypothetical protein
TERG_00258	AGC/AKT protein kinase	cyto_nucl	metabolic process; cellular process;	primary metabolic process; cellular metabolic process; organic substance metabolic process;	phosphorylation; cellular protein metabolic process; phosphate-containing compound metabolic process; protein phosphorylation; phosphorus metabolic process; cellular macromolecule metabolic process; cellular protein modification process; protein metabolic process; macromolecule metabolic process; protein modification process; macromolecule modification;				catalytic activity; binding;	ion binding; protein binding; organic cyclic compound binding; heterocyclic compound binding; carbohydrate derivative binding; transferase activity; small molecule binding;	ATP binding; nucleoside phosphate binding; phosphotransferase activity, alcohol group as acceptor; nucleoside binding; nucleotide binding; protein kinase activity; ribonucleoside binding; kinase activity; ribonucleotide binding; purine ribonucleoside binding; purine ribonucleotide binding; anion binding; protein serine/threonine kinase activity; adenyl ribonucleotide binding; adenyl nucleotide bi…	K19800	SCH9; serine/threonine protein kinase SCH9 [EC:2.7.11.1]	ko04213 Longevity regulating pathway - multiple species;	IPR000719; IPR000008; IPR017892; IPR011009; IPR000961;	"Protein kinase domain; C2 domain; Protein kinase, C-terminal; Protein kinase-like domain; AGC-kinase, C-terminal; "
TERG_00266	hypothetical protein
TERG_00267	hypothetical protein
TERG_00268	C6 transcription factor protein	nucleus	regulation of transcription; positive regulation of transcription by RNA polymerase II			nucleus			DNA binding; transcriptional activator activity, RNA polymerase II proximal promoter sequence-specific DNA binding
TERG_00269	Phosphoglycerate mutase family domain protein	mitochondria	metabolic process;						catalytic activity;
TERG_00270	Dor1-like family protein	nucleus				macromolecular complex; cell; organelle;	organelle part; cell part; membrane-bounded organelle; protein complex; tethering complex;	intracellular organelle; cytoplasm; intracellular organelle part; endomembrane system; intracellular part; intracellular membrane-bounded organelle; intracellular; Golgi apparatus part; Golgi transport complex; Golgi apparatus; cytoplasmic part;
TERG_00271	hypothetical protein
TERG_00272	hypothetical protein
TERG_00273	hypothetical protein
TERG_00274	Ubiquinone/menaquinone biosynthesis-related protein	mitochondria										K17803			IPR029063;	S-adenosyl-L-methionine-dependent methyltransferase;
TERG_00275	Fructosyl amino acid oxidasesarcosine oxidase, putative	extracellular	single-organism process; metabolic process;	single-organism metabolic process;	oxidation-reduction process;				catalytic activity;	oxidoreductase activity;		K00306	PIPOX; sarcosine oxidase / L-pipecolate oxidase [EC:1.5.3.1 1.5.3.7]	ko00310 Lysine degradation; ko04146 Peroxisome; ko01100 Metabolic pathways; ko03022 Basal transcription factors;	IPR006076; IPR023753;	FAD dependent oxidoreductase; FAD/NAD(P)-binding domain;
TERG_00276	TATA-box-binding protein	mitochondria	metabolic process; cellular process;	nitrogen compound metabolic process; biosynthetic process; primary metabolic process; cellular metabolic process; organic substance metabolic process;	heterocycle biosynthetic process; cellular aromatic compound metabolic process; nucleic acid-templated transcription; DNA-templated transcription, initiation; nucleobase-containing compound biosynthetic process; organic cyclic compound metabolic process; RNA biosynthetic process; organic substance biosynthetic process; cellular biosynthetic process; RNA metabolic process; nucleic acid metabolic p…				binding;	organic cyclic compound binding; heterocyclic compound binding;	DNA binding; nucleic acid binding;	K03120	TBP; transcription initiation factor TFIID TATA-box-binding protein	ko05169 Epstein-Barr virus infection; ko03022 Basal transcription factors; ko05203 Viral carcinogenesis; ko05016 Huntington's disease; ko05166 HTLV-I infection; ko05168 Herpes simplex infection;	IPR012295;	"Beta2-adaptin/TBP, C-terminal domain; "
TERG_00279	Pre-RNA splicing factor Srp2, putative	nucleus							binding;	organic cyclic compound binding; heterocyclic compound binding; small molecule binding;	nucleoside phosphate binding; nucleic acid binding; nucleotide binding;				IPR000504; IPR012677;	RNA recognition motif domain; Nucleotide-binding alpha-beta plait domain;
TERG_00280	Dihydroneopterin aldolase domain protein	cytoplasm	single-organism process; metabolic process; cellular process;	single-organism cellular process; nitrogen compound metabolic process; cellular metabolic process; organic substance metabolic process; single-organism metabolic process;	cellular aromatic compound metabolic process; small molecule metabolic process; organic cyclic compound metabolic process; coenzyme metabolic process; cellular amide metabolic process; pteridine-containing compound metabolic process; cofactor metabolic process; heterocycle metabolic process; cellular modified amino acid metabolic process; carboxylic acid metabolic process; cellular nitrogen compo…				catalytic activity;	lyase activity;	dihydroneopterin aldolase activity; aldehyde-lyase activity; carbon-carbon lyase activity;				IPR006157;	Dihydroneopterin aldolase/epimerase domain;
TERG_00281	AGC/RSK protein kinase	cytoplasm	metabolic process; cellular process;	primary metabolic process; cellular metabolic process; organic substance metabolic process;	phosphorylation; cellular protein metabolic process; phosphate-containing compound metabolic process; protein phosphorylation; phosphorus metabolic process; cellular macromolecule metabolic process; cellular protein modification process; protein metabolic process; macromolecule metabolic process; protein modification process; macromolecule modification;				catalytic activity; binding;	ion binding; organic cyclic compound binding; heterocyclic compound binding; carbohydrate derivative binding; transferase activity; small molecule binding;	ATP binding; nucleoside phosphate binding; phosphotransferase activity, alcohol group as acceptor; nucleoside binding; nucleotide binding; protein kinase activity; ribonucleoside binding; kinase activity; ribonucleotide binding; purine ribonucleoside binding; purine ribonucleotide binding; anion binding; protein serine/threonine kinase activity; adenyl ribonucleotide binding; adenyl nucleotide bi…				IPR000719; IPR000961; IPR011009;	"Protein kinase domain; AGC-kinase, C-terminal; Protein kinase-like domain; "
TERG_00285	hypothetical protein
TERG_00286	hypothetical protein
TERG_00289	hypothetical protein	cytoskeleton	localization; biological regulation;	regulation of biological quality; macromolecule localization;	lipid storage; lipid localization; maintenance of location;
TERG_00294	hypothetical protein
TERG_00296	hypothetical protein	nucleus				organelle; cell;	cell part; membrane-bounded organelle;	intracellular membrane-bounded organelle; intracellular organelle; nucleus; intracellular; intracellular part;
TERG_00297	galactokinase	cyto_nucl	single-organism process; metabolic process; cellular process;	primary metabolic process; cellular metabolic process; organic substance metabolic process; single-organism metabolic process;	phosphorylation; small molecule metabolic process; carbohydrate metabolic process; phosphate-containing compound metabolic process; single-organism carbohydrate metabolic process; cellular carbohydrate metabolic process; phosphorus metabolic process; carbohydrate phosphorylation; monosaccharide metabolic process; galactose metabolic process; hexose metabolic process;	cell;	cell part;	intracellular part; intracellular; cytoplasm;	catalytic activity; binding;	ion binding; organic cyclic compound binding; heterocyclic compound binding; carbohydrate derivative binding; transferase activity; small molecule binding;	ATP binding; nucleoside phosphate binding; phosphotransferase activity, alcohol group as acceptor; nucleoside binding; nucleotide binding; ribonucleoside binding; carbohydrate kinase activity; kinase activity; ribonucleotide binding; purine ribonucleoside binding; anion binding; purine ribonucleotide binding; adenyl ribonucleotide binding; adenyl nucleotide binding; purine nucleoside binding; gal…	K00849	galK; galactokinase [EC:2.7.1.6]	ko00052 Galactose metabolism; ko01100 Metabolic pathways; ko00520 Amino sugar and nucleotide sugar metabolism;	IPR019539; IPR020568; IPR006204; IPR014721; IPR013750;	"Galactokinase galactose-binding domain; Ribosomal protein S5 domain 2-type fold; GHMP kinase N-terminal domain; Ribosomal protein S5 domain 2-type fold, subgroup; GHMP kinase, C-terminal domain; "
TERG_00299	acetolactate synthase, large subunit, biosynthetic type	mitochondria	single-organism process; metabolic process; cellular process;	single-organism cellular process; nitrogen compound metabolic process; biosynthetic process; primary metabolic process; cellular metabolic process; organic substance metabolic process; single-organism metabolic process;	cellular amino acid biosynthetic process; organic acid biosynthetic process; single-organism biosynthetic process; branched-chain amino acid biosynthetic process; small molecule metabolic process; organonitrogen compound biosynthetic process; organic substance biosynthetic process; cellular biosynthetic process; carboxylic acid biosynthetic process; cellular amino acid metabolic process; carboxyl…				catalytic activity; binding;	ion binding; sulfur compound binding; cofactor binding; heterocyclic compound binding; organic cyclic compound binding; transferase activity; small molecule binding;	magnesium ion binding; vitamin binding; nucleoside phosphate binding; flavin adenine dinucleotide binding; acetolactate synthase activity; nucleotide binding; thiamine pyrophosphate binding; transferase activity, transferring aldehyde or ketonic groups; cation binding; metal ion binding; anion binding; coenzyme binding;	K01652	E2.2.1.6L; acetolactate synthase I/II/III large subunit [EC:2.2.1.6]	ko01130 Biosynthesis of antibiotics; ko01110 Biosynthesis of secondary metabolites; ko01230 Biosynthesis of amino acids; ko01100 Metabolic pathways; ko01210 2-Oxocarboxylic acid metabolism; ko00770 Pantothenate and CoA biosynthesis; ko00660 C5-Branched dibasic acid metabolism; ko00410 beta-Alanine metabolism; ko00650 Butanoate metabolism;	IPR012000; IPR029035; IPR029061; IPR011766; IPR012001;	"Thiamine pyrophosphate enzyme, central domain; DHS-like NAD/FAD-binding domain; Thiamin diphosphate-binding fold; Thiamine pyrophosphate enzyme, C-terminal TPP-binding; Thiamine pyrophosphate enzyme, N-terminal TPP-binding domain; "
TERG_00300	RING finger domain protein	plasma membrane							binding;	ion binding;	cation binding; metal ion binding; zinc ion binding; transition metal ion binding;				IPR013083; IPR011016;	"Zinc finger, RING/FYVE/PHD-type; Zinc finger, RING-CH-type; "
TERG_00302	GTP-binding protein rho2	cytoplasm	single-organism process; signaling; response to stimulus; cellular process; biological regulation;	single organism signaling; cellular response to stimulus; regulation of biological process; cell communication;	regulation of cellular process; signal transduction; intracellular signal transduction; small GTPase mediated signal transduction;				binding;	ion binding; organic cyclic compound binding; heterocyclic compound binding; carbohydrate derivative binding; small molecule binding;	nucleoside phosphate binding; nucleoside binding; nucleotide binding; ribonucleoside binding; ribonucleotide binding; purine ribonucleoside binding; anion binding; purine ribonucleotide binding; purine nucleoside binding; guanyl ribonucleotide binding; guanyl nucleotide binding; GTP binding; purine nucleotide binding; purine ribonucleoside triphosphate binding;	K07975			IPR005225; IPR027417;	Small GTP-binding protein domain; P-loop containing nucleoside triphosphate hydrolase;
TERG_00308	Transcription factor TFIIIC complex subunit Tfc6, putative	nucleus										K15205
TERG_00311	hypothetical protein	cyto_nucl							binding;	protein binding;					IPR011990;	Tetratricopeptide-like helical domain;
TERG_00313	hypothetical protein
TERG_00315	RAN protein kinase
TERG_00316	hypothetical protein
TERG_00320	CMGC/DYRK/PRP4 protein kinase	nucleus	metabolic process; cellular process;	primary metabolic process; cellular metabolic process; organic substance metabolic process;	phosphorylation; cellular protein metabolic process; phosphate-containing compound metabolic process; protein phosphorylation; phosphorus metabolic process; cellular macromolecule metabolic process; cellular protein modification process; protein metabolic process; macromolecule metabolic process; protein modification process; macromolecule modification;				catalytic activity; binding;	ion binding; organic cyclic compound binding; heterocyclic compound binding; carbohydrate derivative binding; transferase activity; small molecule binding;	ATP binding; nucleoside phosphate binding; phosphotransferase activity, alcohol group as acceptor; nucleoside binding; protein kinase activity; nucleotide binding; ribonucleoside binding; kinase activity; ribonucleotide binding; purine ribonucleoside binding; anion binding; purine ribonucleotide binding; adenyl ribonucleotide binding; adenyl nucleotide binding; purine nucleoside binding; transfer…	K08827			IPR000719; IPR011009;	Protein kinase domain; Protein kinase-like domain;
TERG_00321	hypothetical protein	nucleus
TERG_00327	hypothetical protein
TERG_00328	hypothetical protein	nucleus
TERG_00331	hypothetical protein
TERG_00334	hypothetical protein	nucleus
TERG_00336	Mitochondrial F1F0 ATP synthase subunit Atp14, putative	mitochondria	single-organism process; metabolic process; cellular process; localization;	biosynthetic process; cellular metabolic process; establishment of localization; single-organism cellular process; single-organism metabolic process; organic substance metabolic process; single-organism localization; nitrogen compound metabolic process; primary metabolic process;	nucleoside metabolic process; purine nucleoside metabolic process; purine ribonucleoside monophosphate metabolic process; nucleotide metabolic process; purine ribonucleoside biosynthetic process; nucleoside biosynthetic process; ribonucleoside monophosphate biosynthetic process; phosphate-containing compound metabolic process; ribose phosphate biosynthetic process; carbohydrate derivative biosynt…	membrane; macromolecular complex; cell; organelle;	organelle part; membrane part; cell part; membrane-bounded organelle; protein complex;	inner mitochondrial membrane protein complex; organelle membrane; membrane protein complex; cytoplasm; mitochondrial protein complex; intracellular part; mitochondrial membrane part; mitochondrial envelope; intracellular; organelle inner membrane; proton-transporting two-sector ATPase complex, proton-transporting domain; mitochondrial inner membrane; intracellular organelle; mitochondrial part; i…				K02141	ATPeFH; F-type H+-transporting ATPase subunit h	ko00190 Oxidative phosphorylation; ko01100 Metabolic pathways;
TERG_00338	Glutamate carboxypeptidase Tre2, putative	plasma membrane													IPR003137; IPR007365; IPR007484;	"PA domain; Transferrin receptor-like, dimerisation domain; peptidase M28; "
TERG_00339	hydroxymethylglutaryl-CoA synthase	cytoplasm	single-organism process; metabolic process; cellular process;	single-organism cellular process; biosynthetic process; primary metabolic process; cellular metabolic process; organic substance metabolic process; single-organism metabolic process;	isoprenoid metabolic process; single-organism biosynthetic process; cellular lipid metabolic process; organic substance biosynthetic process; cellular biosynthetic process; lipid biosynthetic process; isoprenoid biosynthetic process; lipid metabolic process;				catalytic activity;	transferase activity;	hydroxymethylglutaryl-CoA synthase activity; transferase activity, transferring acyl groups; transferase activity, transferring acyl groups, acyl groups converted into alkyl on transfer;	K01641	E2.3.3.10; hydroxymethylglutaryl-CoA synthase [EC:2.3.3.10]	ko00072 Synthesis and degradation of ketone bodies; ko01130 Biosynthesis of antibiotics; ko03460 Fanconi anemia pathway; ko01110 Biosynthesis of secondary metabolites; ko01100 Metabolic pathways; ko00900 Terpenoid backbone biosynthesis; ko00650 Butanoate metabolism;	IPR013746; IPR016039; IPR013528;	"Hydroxymethylglutaryl-coenzyme A synthase C-terminal domain; Thiolase-like; Hydroxymethylglutaryl-coenzyme A synthase, N-terminal; "
TERG_00342	phosphoglucomutase	cytoplasm	metabolic process;	primary metabolic process; organic substance metabolic process;	carbohydrate metabolic process;				catalytic activity; binding;	isomerase activity; ion binding;	magnesium ion binding; intramolecular transferase activity, phosphotransferases; metal ion binding; cation binding; intramolecular transferase activity;	K01835	pgm; phosphoglucomutase [EC:5.4.2.2]	ko00030 Pentose phosphate pathway; ko00230 Purine metabolism; ko01130 Biosynthesis of antibiotics; ko00500 Starch and sucrose metabolism; ko01110 Biosynthesis of secondary metabolites; ko01100 Metabolic pathways; ko00521 Streptomycin biosynthesis; ko01120 Microbial metabolism in diverse environments; ko00010 Glycolysis / Gluconeogenesis; ko00052 Galactose metabolism; ko00520 Amino sugar and nucle…	IPR005846; IPR005843; IPR005845; IPR016055; IPR005844;	"Alpha-D-phosphohexomutase, alpha/beta/alpha domain III; Alpha-D-phosphohexomutase, C-terminal; Alpha-D-phosphohexomutase, alpha/beta/alpha domain II; Alpha-D-phosphohexomutase, alpha/beta/alpha I/II/III; Alpha-D-phosphohexomutase, alpha/beta/alpha domain I; "
TERG_00343	RNA exonuclease Rex2, putative	nucleus							binding;	organic cyclic compound binding; heterocyclic compound binding;	nucleic acid binding;	K13288	orn; oligoribonuclease [EC:3.1.-.-]	ko03008 Ribosome biogenesis in eukaryotes;	IPR012337; IPR013520;	"Ribonuclease H-like domain; Exonuclease, RNase T/DNA polymerase III; "
TERG_00344	Integral membrane protein	plasma membrane
TERG_00346	hypothetical protein	nucleus
TERG_00347	hypothetical protein
TERG_00348	hypothetical protein
TERG_00349	hypothetical protein
TERG_00351	hypothetical protein
TERG_00352	Protein-tyrosine phosphatase 2	nucleus	metabolic process; cellular process;	primary metabolic process; cellular metabolic process; organic substance metabolic process;	cellular protein metabolic process; protein dephosphorylation; dephosphorylation; phosphate-containing compound metabolic process; phosphorus metabolic process; cellular macromolecule metabolic process; cellular protein modification process; protein metabolic process; macromolecule metabolic process; protein modification process; macromolecule modification;				catalytic activity;	hydrolase activity;	phosphoprotein phosphatase activity; protein tyrosine phosphatase activity; phosphoric ester hydrolase activity; phosphatase activity; hydrolase activity, acting on ester bonds;	K01104			IPR029021; IPR000387; IPR003595; IPR000242;	"Protein-tyrosine phosphatase-like; Tyrosine specific protein phosphatases domain; Protein-tyrosine phosphatase, catalytic; PTP type protein phosphatase; "
TERG_00353	hypothetical protein
TERG_00354	hypothetical protein
TERG_00355	pyruvate decarboxylase	cytoskeleton							catalytic activity; binding;	ion binding; lyase activity; cofactor binding; sulfur compound binding; heterocyclic compound binding; organic cyclic compound binding; small molecule binding;	magnesium ion binding; vitamin binding; thiamine pyrophosphate binding; carbon-carbon lyase activity; carboxy-lyase activity; cation binding; metal ion binding; anion binding; coenzyme binding;	K01568	E4.1.1.1; pyruvate decarboxylase [EC:4.1.1.1]	ko01130 Biosynthesis of antibiotics; ko00010 Glycolysis / Gluconeogenesis; ko01110 Biosynthesis of secondary metabolites; ko01100 Metabolic pathways;	IPR012000; IPR029035; IPR029061; IPR012001; IPR011766;	"Thiamine pyrophosphate enzyme, central domain; DHS-like NAD/FAD-binding domain; Thiamin diphosphate-binding fold; Thiamine pyrophosphate enzyme, N-terminal TPP-binding domain; Thiamine pyrophosphate enzyme, C-terminal TPP-binding; "
TERG_00356	THUMP domain protein	nucleus							binding;	organic cyclic compound binding; heterocyclic compound binding;	RNA binding; nucleic acid binding;	K06963			IPR004114;	THUMP domain;
TERG_00359	BZIP transcription factor (MeaB), putative	nucleus	biological regulation;	regulation of biological process;	regulation of cellular process; regulation of gene expression; regulation of transcription, DNA-templated; regulation of cellular biosynthetic process; regulation of primary metabolic process; regulation of macromolecule metabolic process; regulation of nucleobase-containing compound metabolic process; regulation of macromolecule biosynthetic process; regulation of cellular metabolic process; reg…				binding; nucleic acid binding transcription factor activity;	organic cyclic compound binding; heterocyclic compound binding; transcription factor activity, sequence-specific DNA binding;	DNA binding; nucleic acid binding; sequence-specific DNA binding;				IPR004827;	Basic-leucine zipper domain;
TERG_00362	Glutaminase, putative	extracellular													IPR033433; IPR032514; IPR014870;	Domain of unknown function DUF5127; Domain of unknown function DUF4965; Domain of unknown function DUF1793;
TERG_00363	glutamate-tRNA ligase	cytoplasm	single-organism process; metabolic process; cellular process;	biosynthetic process; cellular metabolic process; organic substance metabolic process; single-organism cellular process; nitrogen compound metabolic process; primary metabolic process; single-organism metabolic process;	peptide metabolic process; cellular aromatic compound metabolic process; cellular protein metabolic process; organonitrogen compound biosynthetic process; tRNA aminoacylation; cellular amino acid metabolic process; heterocycle metabolic process; nucleobase-containing compound metabolic process; cellular nitrogen compound metabolic process; tRNA aminoacylation for protein translation; protein meta…	cell;	cell part;	intracellular part; intracellular; cytoplasm;	catalytic activity; binding;	ion binding; ligase activity; organic cyclic compound binding; heterocyclic compound binding; carbohydrate derivative binding; small molecule binding;	ligase activity, forming aminoacyl-tRNA and related compounds; ATP binding; nucleoside phosphate binding; ligase activity, forming carbon-oxygen bonds; glutamate-tRNA ligase activity; nucleoside binding; nucleotide binding; ribonucleoside binding; ribonucleotide binding; purine ribonucleoside binding; purine ribonucleotide binding; anion binding; adenyl ribonucleotide binding; adenyl nucleotide b…	K01885	EARS; glutamyl-tRNA synthetase [EC:6.1.1.17]	ko01110 Biosynthesis of secondary metabolites; ko01100 Metabolic pathways; ko00860 Porphyrin and chlorophyll metabolism; ko00970 Aminoacyl-tRNA biosynthesis;	IPR014729; IPR020061; IPR020056; IPR010987; IPR020058; IPR011035; IPR020059;	"Rossmann-like alpha/beta/alpha sandwich fold; Glutamyl/glutaminyl-tRNA synthetase, class Ib, alpha-bundle domain; Ribosomal protein L25/Gln-tRNA synthetase, beta-barrel domain; Glutathione S-transferase, C-terminal-like; Glutamyl/glutaminyl-tRNA synthetase, class Ib, catalytic domain; Ribosomal protein L25/Gln-tRNA synthetase, anti-codon-binding domain; Glutamyl/glutaminyl-tRNA synthetase, class…
TERG_00364	hypothetical protein
TERG_00365	hypothetical protein
TERG_00367	ATP-dependent RNA helicase DBP8	nucleus							binding;	ion binding; organic cyclic compound binding; heterocyclic compound binding; carbohydrate derivative binding; small molecule binding;	ATP binding; nucleoside phosphate binding; nucleoside binding; nucleotide binding; ribonucleoside binding; ribonucleotide binding; nucleic acid binding; purine ribonucleoside binding; anion binding; purine ribonucleotide binding; adenyl ribonucleotide binding; adenyl nucleotide binding; purine nucleoside binding; purine nucleotide binding; purine ribonucleoside triphosphate binding;	K14778			IPR011545; IPR014014; IPR014001; IPR027417; IPR001650;	"DEAD/DEAH box helicase domain; RNA helicase, DEAD-box type, Q motif; Helicase superfamily 1/2, ATP-binding domain; P-loop containing nucleoside triphosphate hydrolase; Helicase, C-terminal; "
TERG_00369	branchpoint-bridging protein	nucleus							binding;	organic cyclic compound binding; heterocyclic compound binding; ion binding;	RNA binding; transition metal ion binding; nucleic acid binding; metal ion binding; cation binding; zinc ion binding;	K13095			IPR004087; IPR004088; IPR032570; IPR001878;	"K Homology domain; K Homology domain, type 1; Splicing factor 1, helix-hairpin domain; Zinc finger, CCHC-type; "
TERG_00371	hypothetical protein
TERG_00375	hypothetical protein
TERG_00376	hypothetical protein	nucleus													IPR027417;	P-loop containing nucleoside triphosphate hydrolase;
TERG_00380	Vacuolar membrane protease	plasma membrane													IPR007484;	peptidase M28;
TERG_00381	Ubiquitin ligase complex F-box protein GRR1, putative	nucleus							binding;	protein binding;		K03360	GRR1; F-box and leucine-rich repeat protein GRR1	ko04120 Ubiquitin mediated proteolysis; ko04111 Cell cycle - yeast;	IPR001810; IPR032675;	"F-box domain; Leucine-rich repeat domain, L domain-like; "
TERG_00382	AMP-binding domain protein, putative	cytoplasm	metabolic process;						catalytic activity;						IPR025110; IPR000873;	AMP-binding enzyme C-terminal domain; AMP-dependent synthetase/ligase;
TERG_00383	60S ribosomal protein L16	cyto_nucl	metabolic process; cellular process;	nitrogen compound metabolic process; biosynthetic process; primary metabolic process; cellular metabolic process; organic substance metabolic process;	peptide metabolic process; peptide biosynthetic process; cellular protein metabolic process; cellular amide metabolic process; organonitrogen compound biosynthetic process; organic substance biosynthetic process; cellular biosynthetic process; cellular nitrogen compound biosynthetic process; cellular macromolecule biosynthetic process; cellular macromolecule metabolic process; cellular nitrogen c…	macromolecular complex; cell; organelle;	organelle part; non-membrane-bounded organelle; cell part; ribonucleoprotein complex;	ribosome; intracellular organelle; intracellular non-membrane-bounded organelle; intracellular organelle part; cytoplasm; intracellular part; large ribosomal subunit; ribosomal subunit; intracellular; intracellular ribonucleoprotein complex; cytoplasmic part;	structural molecule activity;	structural constituent of ribosome;		K02872	RP-L13Ae; large subunit ribosomal protein L13Ae	ko03010 Ribosome;
TERG_00384	hypothetical protein
TERG_00385	Amid-like NADH oxidoreductase, putative	cytoplasm	single-organism process; metabolic process;	single-organism metabolic process;	oxidation-reduction process;				catalytic activity;	oxidoreductase activity;					IPR023753;	FAD/NAD(P)-binding domain;
TERG_00386	hypothetical protein
TERG_00388	hypothetical protein
TERG_00389	hypothetical protein	extracellular
TERG_00393	hypothetical protein	nucleus	biological regulation;	regulation of biological process;	regulation of cellular process; regulation of gene expression; regulation of transcription, DNA-templated; regulation of cellular biosynthetic process; regulation of primary metabolic process; regulation of macromolecule metabolic process; regulation of nucleobase-containing compound metabolic process; regulation of transcription from RNA polymerase II promoter; regulation of macromolecule biosyn…	macromolecular complex; cell; membrane-enclosed lumen; organelle;	organelle part; cell part; membrane-bounded organelle; protein complex;	intracellular organelle; intracellular organelle part; nuclear lumen; intracellular part; intracellular membrane-bounded organelle; nucleoplasm; nucleus; intracellular organelle lumen; mediator complex; intracellular; nucleoplasm part; organelle lumen; nuclear part;	binding; transcription factor activity, protein binding;	ion binding; transcription factor activity, transcription factor binding;	RNA polymerase II transcription cofactor activity; transcription factor activity, RNA polymerase II transcription factor binding; cation binding; metal ion binding; transcription cofactor activity;				IPR007087;	"Zinc finger, C2H2; "
TERG_00396	hypothetical protein
TERG_00398	C2H2 finger domain protein, putative	nucleus							binding;	ion binding;	metal ion binding; cation binding;				IPR007087;	"Zinc finger, C2H2; "
TERG_00399	hypothetical protein
TERG_00402	hypothetical protein
TERG_00415	KH domain RNA-binding protein	nucleus							binding;	organic cyclic compound binding; heterocyclic compound binding;	RNA binding; nucleic acid binding;	K18738			IPR004087; IPR004088;	"K Homology domain; K Homology domain, type 1; "
TERG_00416	hypothetical protein
TERG_00418	Protein yippee-like	cytoplasm
TERG_00421	hypothetical protein
TERG_00423	CAMK/CAMKL/PASK protein kinase	nucleus	metabolic process; cellular process;	primary metabolic process; cellular metabolic process; organic substance metabolic process;	phosphorylation; cellular protein metabolic process; phosphate-containing compound metabolic process; protein phosphorylation; phosphorus metabolic process; cellular macromolecule metabolic process; cellular protein modification process; protein metabolic process; macromolecule metabolic process; protein modification process; macromolecule modification;				catalytic activity; binding;	ion binding; organic cyclic compound binding; heterocyclic compound binding; carbohydrate derivative binding; transferase activity; small molecule binding;	ATP binding; nucleoside phosphate binding; phosphotransferase activity, alcohol group as acceptor; nucleoside binding; protein kinase activity; nucleotide binding; ribonucleoside binding; kinase activity; ribonucleotide binding; purine ribonucleoside binding; anion binding; purine ribonucleotide binding; adenyl ribonucleotide binding; adenyl nucleotide binding; purine nucleoside binding; transfer…	K08286			IPR000719; IPR011009;	Protein kinase domain; Protein kinase-like domain;
TERG_00424	hypothetical protein
TERG_00425	rRNA-processing protein efg1	nucleus	metabolic process; cellular process; cellular component organization or biogenesis;	cellular component biogenesis; nitrogen compound metabolic process; primary metabolic process; cellular metabolic process; organic substance metabolic process;	rRNA metabolic process; RNA processing; ncRNA processing; ribonucleoprotein complex biogenesis; cellular aromatic compound metabolic process; ribosome biogenesis; organic cyclic compound metabolic process; RNA metabolic process; nucleic acid metabolic process; heterocycle metabolic process; nucleobase-containing compound metabolic process; rRNA processing; cellular macromolecule metabolic process…
TERG_00432	hypothetical protein
TERG_00437	Ribosome biogenesis protein Kri1	nucleus										K14786			IPR024626;	"Kri1-like, C-terminal; "
TERG_00438	Transcription factor SipA3, putative	cytoplasm													IPR031968; IPR011993; IPR001849;	Domain of unknown function DUF4782; PH domain-like; Pleckstrin homology domain;
TERG_00443	hypothetical protein
TERG_00445	Histone deacetylase complex subunit (Hos4), putative	nucleus							binding;	protein binding;					IPR020683;	Ankyrin repeat-containing domain;
TERG_00449	hypothetical protein
TERG_00450	hypothetical protein
TERG_00451	hypothetical protein
TERG_00452	hypothetical protein
TERG_00455	ribosome-interacting GTPase 1	nucleus							binding;	ion binding; organic cyclic compound binding; heterocyclic compound binding; carbohydrate derivative binding; small molecule binding;	nucleoside phosphate binding; nucleoside binding; nucleotide binding; ribonucleoside binding; ribonucleotide binding; purine ribonucleoside binding; anion binding; purine ribonucleotide binding; purine nucleoside binding; guanyl ribonucleotide binding; guanyl nucleotide binding; GTP binding; purine nucleotide binding; purine ribonucleoside triphosphate binding;	K06944			IPR012676; IPR004095; IPR006073; IPR031167; IPR031662; IPR027417;	"TGS-like; TGS; GTP binding domain; OBG-type guanine nucleotide-binding (G) domain; GTP binding protein, second domain; P-loop containing nucleoside triphosphate hydrolase; "
TERG_00456	Cysteine dioxygenase	cytoplasm	single-organism process; metabolic process;	single-organism metabolic process;	oxidation-reduction process;				catalytic activity; binding;	ion binding; oxidoreductase activity;	oxidoreductase activity, acting on single donors with incorporation of molecular oxygen, incorporation of two atoms of oxygen; iron ion binding; oxidoreductase activity, acting on single donors with incorporation of molecular oxygen; transition metal ion binding; dioxygenase activity; metal ion binding; cation binding;	K00456	CDO1; cysteine dioxygenase [EC:1.13.11.20]	ko00270 Cysteine and methionine metabolism; ko00430 Taurine and hypotaurine metabolism; ko01100 Metabolic pathways;	IPR011051; IPR014710;	RmlC-like cupin domain; RmlC-like jelly roll fold;
TERG_00457	hypothetical protein
TERG_00458	Alpha/beta fold family hydrolase, putative	extracellular													IPR029058; IPR000073;	Alpha/Beta hydrolase fold; Alpha/beta hydrolase fold-1;
TERG_00460	Protein phosphotase 2a 65kd regulatory sububit	cytoskeleton							binding;			K03456	PPP2R1; serine/threonine-protein phosphatase 2A regulatory subunit A	ko04261 Adrenergic signaling in cardiomyocytes; ko05160 Hepatitis C; ko04113 Meiosis - yeast; ko04391 Hippo signaling pathway - fly; ko04071 Sphingolipid signaling pathway; ko04390 Hippo signaling pathway; ko04151 PI3K-Akt signaling pathway; ko04114 Oocyte meiosis; ko05142 Chagas disease (American trypanosomiasis); ko04730 Long-term depression; ko03015 mRNA surveillance pathway; ko04530 Tight jun…	IPR011989; IPR016024;	Armadillo-like helical; Armadillo-type fold;
TERG_00461	phenylalanine-tRNA ligase, beta subunit	cytoplasm	single-organism process; metabolic process; cellular process;	biosynthetic process; cellular metabolic process; organic substance metabolic process; single-organism cellular process; nitrogen compound metabolic process; primary metabolic process; single-organism metabolic process;	peptide metabolic process; cellular aromatic compound metabolic process; cellular protein metabolic process; organonitrogen compound biosynthetic process; tRNA aminoacylation; phenylalanyl-tRNA aminoacylation; cellular amino acid metabolic process; heterocycle metabolic process; nucleobase-containing compound metabolic process; cellular nitrogen compound metabolic process; tRNA aminoacylation for…	cell;	cell part;	intracellular part; intracellular; cytoplasm;	catalytic activity; binding;	ligase activity; heterocyclic compound binding; organic cyclic compound binding; ion binding; carbohydrate derivative binding; small molecule binding;	ligase activity, forming aminoacyl-tRNA and related compounds; nucleoside phosphate binding; ligase activity, forming carbon-oxygen bonds; phenylalanine-tRNA ligase activity; ribonucleotide binding; purine ribonucleoside binding; cation binding; anion binding; adenyl ribonucleotide binding; adenyl nucleotide binding; aminoacyl-tRNA ligase activity; purine nucleotide binding; purine ribonucleoside…	K01890	FARSB; phenylalanyl-tRNA synthetase beta chain [EC:6.1.1.20]	ko00970 Aminoacyl-tRNA biosynthesis;	IPR009061; IPR005147; IPR020825; IPR005146;	"Putative DNA-binding domain; tRNA synthetase, B5-domain; Phenylalanyl-tRNA synthetase, B3/B4; B3/B4 tRNA-binding domain; "
TERG_00462	40S ribosomal protein	mitochondria	metabolic process; cellular process;	nitrogen compound metabolic process; biosynthetic process; primary metabolic process; cellular metabolic process; organic substance metabolic process;	peptide metabolic process; peptide biosynthetic process; cellular protein metabolic process; cellular amide metabolic process; organonitrogen compound biosynthetic process; organic substance biosynthetic process; cellular biosynthetic process; cellular nitrogen compound biosynthetic process; cellular macromolecule biosynthetic process; cellular macromolecule metabolic process; cellular nitrogen c…	macromolecular complex; cell; organelle;	organelle part; non-membrane-bounded organelle; cell part; ribonucleoprotein complex;	ribosome; intracellular organelle; intracellular non-membrane-bounded organelle; small ribosomal subunit; intracellular organelle part; cytoplasm; intracellular part; ribosomal subunit; intracellular; intracellular ribonucleoprotein complex; cytoplasmic part;	binding; structural molecule activity;	organic cyclic compound binding; heterocyclic compound binding; structural constituent of ribosome;	RNA binding; nucleic acid binding;	K02985	RP-S3e; small subunit ribosomal protein S3e	ko03010 Ribosome;	IPR009019; IPR004044; IPR001351;	"K homology domain, prokaryotic type; K Homology domain, type 2; Ribosomal protein S3, C-terminal; "
TERG_00463	Protein phosphatase	nucleus	metabolic process; cellular process;	cellular metabolic process;	dephosphorylation; phosphorus metabolic process; phosphate-containing compound metabolic process;				catalytic activity;	hydrolase activity;	phosphoprotein phosphatase activity; protein tyrosine phosphatase activity; phosphoric ester hydrolase activity; phosphatase activity; hydrolase activity, acting on ester bonds;				IPR029021; IPR011993; IPR010569;	Protein-tyrosine phosphatase-like; PH domain-like; Myotubularin-like phosphatase domain;
TERG_00466	hypothetical protein
TERG_00473	hypothetical protein	nucleus
TERG_00474	hypothetical protein
TERG_00476	hypothetical protein
TERG_00477	hypothetical protein
TERG_00479	hypothetical protein
TERG_00480	alpha-1,2-Mannosidase	Golgi apparatus				membrane;			catalytic activity; binding;	ion binding; hydrolase activity;	mannosidase activity; mannosyl-oligosaccharide mannosidase activity; hydrolase activity, acting on glycosyl bonds; alpha-mannosidase activity; cation binding; metal ion binding; hydrolase activity, hydrolyzing O-glycosyl compounds; calcium ion binding; mannosyl-oligosaccharide 1,2-alpha-mannosidase activity;	K01230	"MAN1; mannosyl-oligosaccharide alpha-1,2-mannosidase [EC:3.2.1.113]"""	ko04141 Protein processing in endoplasmic reticulum; ko00513 Various types of N-glycan biosynthesis; ko01100 Metabolic pathways; ko00510 N-Glycan biosynthesis;
TERG_00483	hypothetical protein	mitochondria
TERG_00484	Phosphotransferase enzyme family protein	nucleus
TERG_00487	hypothetical protein
TERG_00488	hypothetical protein
TERG_00489	hypothetical protein	cytoplasm
TERG_00491	hypothetical protein
TERG_00492	TBP associated factor (Mot1), putative	cytoplasm							binding;	ion binding; protein binding; organic cyclic compound binding; heterocyclic compound binding; carbohydrate derivative binding; small molecule binding;	ATP binding; nucleoside phosphate binding; nucleoside binding; nucleotide binding; ribonucleoside binding; ribonucleotide binding; purine ribonucleoside binding; anion binding; purine ribonucleotide binding; adenyl ribonucleotide binding; adenyl nucleotide binding; purine nucleoside binding; purine nucleotide binding; purine ribonucleoside triphosphate binding;	K15192			IPR011989; IPR027417; IPR014001; IPR016024; IPR001650; IPR022707; IPR000330;	"Armadillo-like helical; P-loop containing nucleoside triphosphate hydrolase; Helicase superfamily 1/2, ATP-binding domain; Armadillo-type fold; Helicase, C-terminal; Domain of unknown function DUF3535; SNF2-related, N-terminal domain; "
TERG_00493	hypothetical protein	mitochondria										K03938	NDUFS5; NADH dehydrogenase (ubiquinone) Fe-S protein 5	ko05010 Alzheimer's disease; ko00190 Oxidative phosphorylation; ko01100 Metabolic pathways; ko05016 Huntington's disease; ko04932 Non-alcoholic fatty liver disease (NAFLD); ko05012 Parkinson's disease;
TERG_00494	Protein transport protein Sec39, putative	cytoplasm	localization;	establishment of localization;	transport; Golgi vesicle transport; retrograde vesicle-mediated transport, Golgi to ER; vesicle-mediated transport;										IPR013244;	Sec39 domain;
TERG_00498	NAD+ synthetase	nucleus	single-organism process; metabolic process; cellular process;	biosynthetic process; cellular metabolic process; organic substance metabolic process; single-organism cellular process; nitrogen compound metabolic process; primary metabolic process; single-organism metabolic process;	cofactor biosynthetic process; nucleotide biosynthetic process; pyridine nucleotide metabolic process; cellular aromatic compound metabolic process; nicotinamide nucleotide metabolic process; nucleotide metabolic process; pyridine nucleotide biosynthetic process; organonitrogen compound biosynthetic process; pyridine-containing compound metabolic process; phosphate-containing compound metabolic p…				catalytic activity; binding;	ligase activity; ion binding; hydrolase activity; organic cyclic compound binding; heterocyclic compound binding; carbohydrate derivative binding; small molecule binding;	ATP binding; nucleoside phosphate binding; nucleoside binding; nucleotide binding; carbon-nitrogen ligase activity, with glutamine as amido-N-donor; ligase activity, forming carbon-nitrogen bonds; ribonucleoside binding; ribonucleotide binding; purine ribonucleoside binding; anion binding; purine ribonucleotide binding; adenyl ribonucleotide binding; adenyl nucleotide binding; purine nucleoside b…	K01950	E6.3.5.1; NAD+ synthase (glutamine-hydrolysing) [EC:6.3.5.1]	ko01100 Metabolic pathways; ko00760 Nicotinate and nicotinamide metabolism;	IPR014729; IPR003010; IPR022310;	Rossmann-like alpha/beta/alpha sandwich fold; Carbon-nitrogen hydrolase; NAD/GMP synthase;
TERG_00499	hypothetical protein	cytoplasm							binding;	organic cyclic compound binding; heterocyclic compound binding; oxygen binding;	heme binding; tetrapyrrole binding;				IPR012292;	Globin/Protoglobin;
TERG_00501	GPI anchored serine-rich protein	extracellular, cell wall	metabolic process;cell wall macromolecule catabolic process			extracellular, cell wall
TERG_00503	hypothetical protein
TERG_00504	hypothetical protein
TERG_00507	hypothetical protein
TERG_00515	hypothetical protein
TERG_00520	hypothetical protein
TERG_00521	hypothetical protein
TERG_00525	NAK protein kinase	nucleus	metabolic process; cellular process;	primary metabolic process; cellular metabolic process; organic substance metabolic process;	phosphorylation; cellular protein metabolic process; phosphate-containing compound metabolic process; protein phosphorylation; phosphorus metabolic process; cellular macromolecule metabolic process; cellular protein modification process; protein metabolic process; macromolecule metabolic process; protein modification process; macromolecule modification;				catalytic activity; binding;	ion binding; organic cyclic compound binding; heterocyclic compound binding; carbohydrate derivative binding; transferase activity; small molecule binding;	ATP binding; nucleoside phosphate binding; phosphotransferase activity, alcohol group as acceptor; nucleoside binding; protein kinase activity; nucleotide binding; ribonucleoside binding; kinase activity; ribonucleotide binding; purine ribonucleoside binding; anion binding; purine ribonucleotide binding; adenyl ribonucleotide binding; adenyl nucleotide binding; purine nucleoside binding; transfer…	K08853			IPR000719; IPR011009;	Protein kinase domain; Protein kinase-like domain;
TERG_00527	hypothetical protein
TERG_00528	hypothetical protein
TERG_00531	40S ribosomal protein S7	mitochondria	metabolic process; cellular process;	nitrogen compound metabolic process; biosynthetic process; primary metabolic process; cellular metabolic process; organic substance metabolic process;	peptide metabolic process; peptide biosynthetic process; cellular protein metabolic process; cellular amide metabolic process; organonitrogen compound biosynthetic process; organic substance biosynthetic process; cellular biosynthetic process; cellular nitrogen compound biosynthetic process; cellular macromolecule biosynthetic process; cellular macromolecule metabolic process; cellular nitrogen c…	organelle; macromolecular complex; cell;	cell part; ribonucleoprotein complex; non-membrane-bounded organelle;	ribosome; intracellular organelle; intracellular non-membrane-bounded organelle; intracellular; cytoplasm; intracellular part; intracellular ribonucleoprotein complex; cytoplasmic part;	structural molecule activity;	structural constituent of ribosome;		K02993	RP-S7e; small subunit ribosomal protein S7e	ko03010 Ribosome;
TERG_00532	Dynactin Arp1 p62 subunit RO2, putative	nucleus				macromolecular complex; cell; organelle;	organelle part; non-membrane-bounded organelle; cell part; protein complex;	intracellular organelle; intracellular non-membrane-bounded organelle; cytoskeletal part; intracellular organelle part; intracellular part; dynactin complex; microtubule associated complex; actin cytoskeleton; cytoskeleton; microtubule cytoskeleton; intracellular;				K10426	DCTN4; dynactin 4	ko05016 Huntington's disease; ko04962 Vasopressin-regulated water reabsorption;
TERG_00534	Actin-related protein 2/3 complex subunit 5	nucleus	single-organism process; cellular process; cellular component organization or biogenesis; biological regulation;	cellular component organization; regulation of biological quality; single-organism cellular process; regulation of biological process;	regulation of actin filament polymerization; regulation of cellular process; Arp2/3 complex-mediated actin nucleation; positive regulation of protein polymerization; regulation of actin cytoskeleton organization; actin filament organization; regulation of cellular component biogenesis; regulation of actin filament length; positive regulation of cellular component organization; actin cytoskeleton …	macromolecular complex; cell; organelle;	organelle part; non-membrane-bounded organelle; cell part; protein complex;	intracellular organelle; intracellular non-membrane-bounded organelle; cytoskeletal part; intracellular organelle part; intracellular part; actin cytoskeleton; cytoskeleton; Arp2/3 protein complex; intracellular;				K05754	"ARPC5; actin related protein 2/3 complex, subunit 5"""	ko05100 Bacterial invasion of epithelial cells; ko05132 Salmonella infection; ko04810 Regulation of actin cytoskeleton; ko05131 Shigellosis; ko05130 Pathogenic Escherichia coli infection; ko04666 Fc gamma R-mediated phagocytosis; ko04144 Endocytosis;
TERG_00535	calcium-translocating P-type ATPase, PMCA-type
TERG_00536	NAD binding Rossmann fold oxidoreductase, putative	cytoplasm							catalytic activity;	oxidoreductase activity;		K18106	GAAA; D-galacturonate reductase [EC:1.1.1.-]	ko01100 Metabolic pathways; ko00040 Pentose and glucuronate interconversions;	IPR000683; IPR016040;	"Oxidoreductase, N-terminal; NAD(P)-binding domain; "
TERG_00538	Oxidoreductase, zinc-binding	cytoplasm	single-organism process; metabolic process;	single-organism metabolic process;	oxidation-reduction process;				catalytic activity; binding;	ion binding; oxidoreductase activity;	transition metal ion binding; metal ion binding; cation binding; zinc ion binding;	K00002	AKR1A1; alcohol dehydrogenase (NADP+) [EC:1.1.1.2]	ko00930 Caprolactam degradation; ko01120 Microbial metabolism in diverse environments; ko01130 Biosynthesis of antibiotics; ko00010 Glycolysis / Gluconeogenesis; ko01110 Biosynthesis of secondary metabolites; ko00561 Glycerolipid metabolism; ko01100 Metabolic pathways; ko00040 Pentose and glucuronate interconversions; ko01220 Degradation of aromatic compounds;	IPR011032; IPR016040; IPR013154; IPR013149;	"GroES-like; NAD(P)-binding domain; Alcohol dehydrogenase, N-terminal; Alcohol dehydrogenase, C-terminal; "
TERG_00539	F-box and WD-40 domain-containing protein, beta-TrCP, partia	cytosol				cytosol			protein dimerization activity
TERG_00540	Zinc alcohol dehydrogenase, putative	mitochondria							catalytic activity;	oxidoreductase activity;					IPR011032; IPR020843; IPR016040;	"GroES-like; Polyketide synthase, enoylreductase domain; NAD(P)-binding domain; "
TERG_00541	EB1 domain protein	cytoplasm							binding;	protein binding;	tubulin binding; cytoskeletal protein binding; microtubule binding;	K10436			IPR001715; IPR004953;	"Calponin homology domain; EB1, C-terminal; "
TERG_00545	hypothetical protein	nucleus
TERG_00546	glutaredoxin	cytoplasm	single-organism process; cellular process; biological regulation;	regulation of biological quality; regulation of biological process; single-organism cellular process;	regulation of cellular process; homeostatic process; cell redox homeostasis; cellular homeostasis;				electron carrier activity; catalytic activity;	oxidoreductase activity;	protein disulfide oxidoreductase activity; oxidoreductase activity, acting on a sulfur group of donors; disulfide oxidoreductase activity;	K03676			IPR002109; IPR014025; IPR011899; IPR012336;	"Glutaredoxin; Glutaredoxin subgroup; Glutaredoxin, eukaryotic/virial; Thioredoxin-like fold; "
TERG_00549	hypothetical protein
TERG_00550	hypothetical protein	cytoplasm													IPR016040;	NAD(P)-binding domain;
TERG_00551	PH domain protein	nucleus													IPR011993; IPR029217; IPR001849;	"PH domain-like; Sporulation-specific protein 71, N-terminal domain; Pleckstrin homology domain; "
TERG_00552	Glycolipid transfer protein HET-C2, putative	cytoplasm	single-organism process; localization;	single-organism localization; macromolecule localization; establishment of localization;	transport; lipid transport; glycolipid transport; carbohydrate derivative transport; lipid localization; organic substance transport; single-organism transport;	cell;	cell part;	intracellular part; intracellular; cytoplasm;	binding; transporter activity;	carbohydrate derivative binding; carbohydrate derivative transporter activity; lipid binding; substrate-specific transporter activity;	glycolipid binding; lipid transporter activity; glycolipid transporter activity;				IPR014830;	Glycolipid transfer protein domain;
TERG_00553	hypothetical protein
TERG_00557	hypothetical protein
TERG_00558	Potassium ion channel Yvc1, putative	plasma membrane													IPR013122;	"Polycystin cation channel, PKD1/PKD2; "
TERG_00559	Translation initiation factor 2 alpha subunit, putative	nucleus							binding;	organic cyclic compound binding; heterocyclic compound binding;	translation factor activity, RNA binding; RNA binding; nucleic acid binding; translation initiation factor activity;	K03237	EIF2S1; translation initiation factor 2 subunit 1	ko05160 Hepatitis C; ko05164 Influenza A; ko04932 Non-alcoholic fatty liver disease (NAFLD); ko05168 Herpes simplex infection; ko04141 Protein processing in endoplasmic reticulum; ko05162 Measles; ko03013 RNA transport; ko04210 Apoptosis;	IPR024054; IPR012340; IPR003029; IPR022967; IPR024055;	"Translation initiation factor 2, alpha subunit, middle domain; Nucleic acid-binding, OB-fold; S1 domain; RNA-binding domain, S1; Translation initiation factor 2, alpha subunit, C-terminal; "
TERG_00560	Sulfate transporter, putative	plasma membrane	single-organism process; localization;	single-organism localization; establishment of localization;	transport; anion transport; sulfur compound transport; sulfate transport; ion transport; inorganic anion transport; single-organism transport;	membrane;	membrane part;	intrinsic component of membrane; integral component of membrane;	transporter activity;	substrate-specific transporter activity; transmembrane transporter activity;	sulfur compound transmembrane transporter activity; ion transmembrane transporter activity; sulfate transmembrane transporter activity; inorganic anion transmembrane transporter activity; anion transmembrane transporter activity; substrate-specific transmembrane transporter activity;				IPR011547; IPR002645;	SLC26A/SulP transporter domain; STAS domain;
TERG_00563	GNAT family acetyltransferase, putative	cytoplasm							catalytic activity;	transferase activity;	transferase activity, transferring acyl groups; N-acetyltransferase activity; transferase activity, transferring acyl groups other than amino-acyl groups; acetyltransferase activity; N-acyltransferase activity;				IPR000182; IPR016181;	GNAT domain; Acyl-CoA N-acyltransferase;
TERG_00569	putative C2H2 finger domain protein,Transcription factors	nucleus	regulation of transcription			nucleus			DNA binding; transcriptional activator activity
TERG_00570	hypothetical protein
TERG_00572	Nicotinamide N-methyltransferase Nnt1, putative	cytoplasm										K17878			IPR029063;	S-adenosyl-L-methionine-dependent methyltransferase;
TERG_00574	hypothetical protein
TERG_00576	Saccharopine dehydrogenase [NAD(+), L-lysine-forming]	cytoplasm	single-organism process; metabolic process; cellular process; lysine biosynthetic process	single-organism cellular process; nitrogen compound metabolic process; biosynthetic process; primary metabolic process; cellular metabolic process; organic substance metabolic process; single-organism metabolic process;	aspartate family amino acid biosynthetic process; cellular amino acid biosynthetic process; organic acid biosynthetic process; single-organism biosynthetic process; small molecule metabolic process; lysine metabolic process; aspartate family amino acid metabolic process; alpha-amino acid metabolic process; organonitrogen compound biosynthetic process; organic substance biosynthetic process; cellu…	cytoplasm			catalytic activity;	oxidoreductase activity;	saccharopine dehydrogenase (NAD+, L-lysine-forming) activity; oxidoreductase activity, acting on the CH-NH group of donors; oxidoreductase activity, acting on the CH-NH group of donors, NAD or NADP as acceptor; saccharopine dehydrogenase activity;	K00290	"LYS1; saccharopine dehydrogenase (NAD+, L-lysine forming) [EC:1.5.1.7]"""	ko00310 Lysine degradation; ko01130 Biosynthesis of antibiotics; ko01110 Biosynthesis of secondary metabolites; ko01230 Biosynthesis of amino acids; ko01100 Metabolic pathways; ko00300 Lysine biosynthesis;	IPR007698; IPR016040; IPR007886;	"Alanine dehydrogenase/pyridine nucleotide transhydrogenase, NAD(H)-binding domain; NAD(P)-binding domain; Alanine dehydrogenase/pyridine nucleotide transhydrogenase, N-terminal; "
TERG_00578	hypothetical protein
TERG_00579	hypothetical protein
TERG_00580	hypothetical protein
TERG_00582	Phosphorylase, putative	mitochondria							catalytic activity;	transferase activity;	ATP adenylyltransferase activity; nucleotidyltransferase activity; transferase activity, transferring phosphorus-containing groups; adenylyltransferase activity;	K00988	APA1_2; ATP adenylyltransferase [EC:2.7.7.53]	ko00230 Purine metabolism;	IPR011146; IPR019200;	"HIT-like domain; ATP adenylyltransferase, C-terminal; "
TERG_00583	Extracellular serine-rich protein, putative	extracellular													IPR008972;	Cupredoxin;
TERG_00584	cysteine desulfurase, mitochondrial	mitochondria	metabolic process; cellular process; cellular component organization or biogenesis;	cellular component biogenesis; cellular component organization; biosynthetic process; cellular metabolic process;	sulfur compound metabolic process; cofactor biosynthetic process; [2Fe-2S] cluster assembly; cellular biosynthetic process; cofactor metabolic process; metallo-sulfur cluster assembly; cellular component assembly; iron-sulfur cluster assembly;				catalytic activity; binding;	organic cyclic compound binding; heterocyclic compound binding; ion binding; transferase activity; cofactor binding;	cysteine desulfurase activity; anion binding; transferase activity, transferring sulfur-containing groups; sulfurtransferase activity; pyridoxal phosphate binding;	K04487	iscS; cysteine desulfurase [EC:2.8.1.7]	ko04122 Sulfur relay system; ko01100 Metabolic pathways; ko00730 Thiamine metabolism;	IPR015424; IPR000192; IPR015421; IPR015422;	"Pyridoxal phosphate-dependent transferase; Aminotransferase class V domain; Pyridoxal phosphate-dependent transferase, major region, subdomain 1; Pyridoxal phosphate-dependent transferase, major region, subdomain 2; "
TERG_00585	hypothetical protein
TERG_00586	Endosomal sorting complex protein TSG101, putative	nucleus	metabolic process; localization; cellular process;	primary metabolic process; cellular metabolic process; establishment of localization; organic substance metabolic process; macromolecule localization;	cellular protein metabolic process; organic substance transport; protein transport; transport; establishment of protein localization; cellular macromolecule metabolic process; cellular protein modification process; protein metabolic process; macromolecule metabolic process; protein localization; protein modification process; macromolecule modification;							K12183	TSG101; ESCRT-I complex subunit TSG101	ko04144 Endocytosis;	IPR016135; IPR008883; IPR017916;	"Ubiquitin-conjugating enzyme/RWD-like; Ubiquitin E2 variant, N-terminal; Steadiness box (SB) domain; "
TERG_00587	Nuclear pore complex protein (SonA), putative	cyto_nucl							binding;	protein binding;		K14298	RAE1; mRNA export factor	ko05164 Influenza A; ko03013 RNA transport;	IPR017986; IPR015943;	WD40-repeat-containing domain; WD40/YVTN repeat-like-containing domain;
TERG_00588	hypothetical protein
TERG_00591	hypothetical protein
TERG_00594	AP-1 adaptor complex subunit sigma, putative	mitochondria	localization;	macromolecule localization; establishment of localization;	establishment of protein localization; transport; organic substance transport; protein localization; protein transport;				transporter activity;	substrate-specific transporter activity;	protein transporter activity;				IPR022775;	"AP complex, mu/sigma subunit; "
TERG_00595	Repressor of RNA polymerase III transcription MAF1	nucleus	biological regulation;	regulation of biological process;	regulation of cellular process; regulation of macromolecule metabolic process; regulation of nucleobase-containing compound metabolic process; negative regulation of cellular process; negative regulation of cellular metabolic process; negative regulation of biological process; negative regulation of RNA metabolic process; negative regulation of transcription, DNA-templated; regulation of transcri…
TERG_00596	M protein repeat protein	nucleus
TERG_00597	hypothetical protein
TERG_00598	hypothetical protein
TERG_00599	hypothetical protein
TERG_00601	CMGC/DYRK/DYRK2 protein kinase	nucleus	metabolic process; cellular process;	primary metabolic process; cellular metabolic process; organic substance metabolic process;	phosphorylation; cellular protein metabolic process; phosphate-containing compound metabolic process; protein phosphorylation; phosphorus metabolic process; cellular macromolecule metabolic process; cellular protein modification process; protein metabolic process; macromolecule metabolic process; protein modification process; macromolecule modification;				catalytic activity; binding;	ion binding; organic cyclic compound binding; heterocyclic compound binding; carbohydrate derivative binding; transferase activity; small molecule binding;	ATP binding; nucleoside phosphate binding; phosphotransferase activity, alcohol group as acceptor; nucleoside binding; protein kinase activity; nucleotide binding; ribonucleoside binding; kinase activity; ribonucleotide binding; purine ribonucleoside binding; anion binding; purine ribonucleotide binding; adenyl ribonucleotide binding; adenyl nucleotide binding; purine nucleoside binding; transfer…	K18669	DYRK2_3_4; dual specificity tyrosine-phosphorylation-regulated kinase 2/3/4 [EC:2.7.12.1]	ko04111 Cell cycle - yeast;	IPR000719; IPR011009;	Protein kinase domain; Protein kinase-like domain;
TERG_00602	hypothetical protein
TERG_00604	Nucleolar protein 16	nucleus										K14839
TERG_00605	ZIP family metal cation transporter, putative	plasma membrane	localization;	establishment of localization;	transport; transmembrane transport; cation transport; metal ion transport; ion transport;	membrane;			transporter activity;	substrate-specific transporter activity; transmembrane transporter activity;	metal ion transmembrane transporter activity; ion transmembrane transporter activity; inorganic cation transmembrane transporter activity; cation transmembrane transporter activity; substrate-specific transmembrane transporter activity;	K14713
TERG_00606	Alpha-1,6 mannosyltransferase subunit (Mnn9), putative	mitochondria										K05529	MNN9; mannan polymerase complexes MNN9 subunit [EC:2.4.1.-]	ko00513 Various types of N-glycan biosynthesis; ko01100 Metabolic pathways;	IPR029044;	Nucleotide-diphospho-sugar transferases;
TERG_00607	Mitochondrial carrier protein, putative	mitochondria	localization;	establishment of localization;	transport; transmembrane transport;							K15109			IPR023395;	Mitochondrial carrier domain;
TERG_00608	hypothetical protein
TERG_00610	hypothetical protein
TERG_00614	hypothetical protein
TERG_00618	Exosome complex subunit Rrp46, putative	mitochondria										K12590	RRP46; exosome complex component RRP46	ko03018 RNA degradation;	IPR015847; IPR020568;	"Exoribonuclease, phosphorolytic domain 2; Ribosomal protein S5 domain 2-type fold; "
TERG_00621	hypothetical protein
TERG_00624	Actin polymerization protein Bzz1, putative	nucleus	single-organism process; signaling; response to stimulus; cellular process; biological regulation;	single organism signaling; cellular response to stimulus; regulation of biological process; cell communication;	regulation of cellular process; signal transduction; intracellular signal transduction;				binding;	protein binding;					IPR002219; IPR001452; IPR020454;	"Protein kinase C-like, phorbol ester/diacylglycerol-binding domain; SH3 domain; Diacylglycerol/phorbol-ester binding; "
TERG_00626	ADP-ribosylation factor-like protein 1	cytoplasm	single-organism process; signaling; response to stimulus; cellular process; biological regulation;	single organism signaling; cellular response to stimulus; regulation of biological process; cell communication;	regulation of cellular process; signal transduction; intracellular signal transduction; small GTPase mediated signal transduction;	cell;	cell part;	intracellular;	binding;	ion binding; organic cyclic compound binding; heterocyclic compound binding; carbohydrate derivative binding; small molecule binding;	nucleoside phosphate binding; nucleoside binding; nucleotide binding; ribonucleoside binding; ribonucleotide binding; purine ribonucleoside binding; anion binding; purine ribonucleotide binding; purine nucleoside binding; guanyl ribonucleotide binding; guanyl nucleotide binding; GTP binding; purine nucleotide binding; purine ribonucleoside triphosphate binding;	K07942			IPR005225; IPR027417;	Small GTP-binding protein domain; P-loop containing nucleoside triphosphate hydrolase;
TERG_00629	hypothetical protein
TERG_00631	urate oxidase	mitochondria	single-organism process; metabolic process; cellular process;	single-organism cellular process; nitrogen compound metabolic process; primary metabolic process; cellular metabolic process; organic substance metabolic process; single-organism metabolic process;	cellular aromatic compound metabolic process; oxidation-reduction process; small molecule metabolic process; purine-containing compound metabolic process; organic cyclic compound metabolic process; purine nucleobase metabolic process; heterocycle metabolic process; nucleobase-containing compound metabolic process; nucleobase metabolic process; cellular nitrogen compound metabolic process; nucleob…				catalytic activity;	oxidoreductase activity;	oxidoreductase activity, acting on other nitrogenous compounds as donors, oxygen as acceptor; urate oxidase activity; oxidoreductase activity, acting on other nitrogenous compounds as donors;	K00365	uaZ; urate oxidase [EC:1.7.3.3]	ko00230 Purine metabolism; ko01120 Microbial metabolism in diverse environments; ko01100 Metabolic pathways; ko00232 Caffeine metabolism;
TERG_00632	ribosomal protein L13	mitochondria	metabolic process; cellular process;	nitrogen compound metabolic process; biosynthetic process; primary metabolic process; cellular metabolic process; organic substance metabolic process;	peptide metabolic process; peptide biosynthetic process; cellular protein metabolic process; cellular amide metabolic process; organonitrogen compound biosynthetic process; organic substance biosynthetic process; cellular biosynthetic process; cellular nitrogen compound biosynthetic process; cellular macromolecule biosynthetic process; cellular macromolecule metabolic process; cellular nitrogen c…	organelle; macromolecular complex; cell;	cell part; ribonucleoprotein complex; non-membrane-bounded organelle;	ribosome; intracellular organelle; intracellular non-membrane-bounded organelle; intracellular; cytoplasm; intracellular part; intracellular ribonucleoprotein complex; cytoplasmic part;	structural molecule activity;	structural constituent of ribosome;		K02871	RP-L13; large subunit ribosomal protein L13	ko03010 Ribosome;
TERG_00633	40S ribosomal protein S16	mitochondria	metabolic process; cellular process;	nitrogen compound metabolic process; biosynthetic process; primary metabolic process; cellular metabolic process; organic substance metabolic process;	peptide metabolic process; peptide biosynthetic process; cellular protein metabolic process; cellular amide metabolic process; organonitrogen compound biosynthetic process; organic substance biosynthetic process; cellular biosynthetic process; cellular nitrogen compound biosynthetic process; cellular macromolecule biosynthetic process; cellular macromolecule metabolic process; cellular nitrogen c…	organelle; macromolecular complex; cell;	cell part; ribonucleoprotein complex; non-membrane-bounded organelle;	ribosome; intracellular organelle; intracellular non-membrane-bounded organelle; intracellular; cytoplasm; intracellular part; intracellular ribonucleoprotein complex; cytoplasmic part;	structural molecule activity;	structural constituent of ribosome;		K02960	RP-S16e; small subunit ribosomal protein S16e	ko03010 Ribosome;	IPR014721;	"Ribosomal protein S5 domain 2-type fold, subgroup; "
TERG_00636	Prephenate dehydrogenase	nucleus	single-organism process; metabolic process;	single-organism metabolic process;	oxidation-reduction process;							K00211	TYR1; prephenate dehydrogenase (NADP+) [EC:1.3.1.13]	ko01130 Biosynthesis of antibiotics; ko01110 Biosynthesis of secondary metabolites; ko01100 Metabolic pathways; ko04623 Cytosolic DNA-sensing pathway;	IPR008927;	6-phosphogluconate dehydrogenase C-terminal domain-like;
TERG_00639	Differentiation regulator (Nrd1), putative	nucleus							binding;	organic cyclic compound binding; heterocyclic compound binding; small molecule binding;	nucleoside phosphate binding; nucleic acid binding; nucleotide binding;				IPR000504; IPR012677;	RNA recognition motif domain; Nucleotide-binding alpha-beta plait domain;
TERG_00640	eukaryotic translation initiation factor 3 subunit L	nucleus				macromolecular complex; cell;	cell part; protein complex;	intracellular; cytoplasm; intracellular part; cytoplasmic part; eukaryotic translation initiation factor 3 complex;	binding;	organic cyclic compound binding; heterocyclic compound binding;	RNA binding; translation factor activity, RNA binding; nucleic acid binding; translation initiation factor activity;	K15029
TERG_00641	Iron-sulfur cluster assembly accessory protein Isa2, putative	mitochondria	metabolic process; cellular process; cellular component organization or biogenesis;	cellular component biogenesis; cellular component organization; biosynthetic process; cellular metabolic process;	sulfur compound metabolic process; cofactor biosynthetic process; metallo-sulfur cluster assembly; cellular component assembly; iron-sulfur cluster assembly; cellular biosynthetic process; cofactor metabolic process;				structural molecule activity; binding;	metal cluster binding;	iron-sulfur cluster binding;				IPR000361;	FeS cluster biogenesis;
TERG_00642	HHE domain protein	nucleus													IPR012312;	Haemerythrin-like;
TERG_00645	hypothetical protein
TERG_00652	TOR pathway phosphatidylinositol 3-kinase TorA, putative	nucleus							catalytic activity; binding;	macromolecular complex binding; protein binding; transferase activity;	kinase activity; transferase activity, transferring phosphorus-containing groups;	K07203	MTOR; serine/threonine-protein kinase mTOR [EC:2.7.11.1]	ko04630 Jak-STAT signaling pathway; ko05205 Proteoglycans in cancer; ko04139 Regulation of mitophagy - yeast; ko04930 Type II diabetes mellitus; ko04151 PI3K-Akt signaling pathway; ko05215 Prostate cancer; ko05200 Pathways in cancer; ko05214 Glioma; ko04152 AMPK signaling pathway; ko04072 Phospholipase D signaling pathway; ko04919 Thyroid hormone signaling pathway; ko05231 Choline metabolism in c…	IPR000403; IPR011989; IPR009076; IPR024585; IPR011009; IPR003151; IPR016024; IPR014009;	"Phosphatidylinositol 3-/4-kinase, catalytic domain; Armadillo-like helical; FKBP12-rapamycin binding domain; Domain of unknown function DUF3385, target of rapamycin protein; Protein kinase-like domain; PIK-related kinase, FAT; Armadillo-type fold; PIK-related kinase; "
TERG_00653	hypothetical protein	nucleus
TERG_00657	hypothetical protein
TERG_00658	hypothetical protein
TERG_00659	3-deoxy-7-phosphoheptulonate synthase	cytoplasm	single-organism process; metabolic process; cellular process;	single-organism cellular process; nitrogen compound metabolic process; biosynthetic process; primary metabolic process; cellular metabolic process; organic substance metabolic process; single-organism metabolic process;	cellular amino acid biosynthetic process; aromatic amino acid family metabolic process; organic acid biosynthetic process; single-organism biosynthetic process; cellular aromatic compound metabolic process; small molecule metabolic process; organic cyclic compound metabolic process; aromatic amino acid family biosynthetic process; organonitrogen compound biosynthetic process; organic substance bi…				catalytic activity;	transferase activity;	transferase activity, transferring alkyl or aryl (other than methyl) groups; 3-deoxy-7-phosphoheptulonate synthase activity;	K01626	E2.5.1.54; 3-deoxy-7-phosphoheptulonate synthase [EC:2.5.1.54]	ko01130 Biosynthesis of antibiotics; ko01110 Biosynthesis of secondary metabolites; ko01230 Biosynthesis of amino acids; ko01100 Metabolic pathways; ko04623 Cytosolic DNA-sensing pathway;	IPR006218; IPR013785;	DAHP synthetase I/KDSA; Aldolase-type TIM barrel;
TERG_00660	hypothetical protein	nucleus
TERG_00662	39S ribosomal subunit, protein L50	mitochondrion	mitochondrial translational elongation; translation			mitochondrion			RNA binding; structural constituent of ribosome
TERG_00664	Protein kinase C substrate, putative	nucleus										K08288	PRKCSH; protein kinase C substrate 80K-H	ko04141 Protein processing in endoplasmic reticulum;	IPR009011; IPR028146;	"Mannose-6-phosphate receptor binding domain; Glucosidase II beta subunit, N-terminal; "
TERG_00667	Topoisomerase family protein TRF4, putative	nucleus							catalytic activity;	transferase activity;	nucleotidyltransferase activity; transferase activity, transferring phosphorus-containing groups;	K03514	PAPD5_7; non-canonical poly(A) RNA polymerase PAPD5/7 [EC:2.7.7.19]	ko03018 RNA degradation;	IPR002934; IPR002058;	"Polymerase, nucleotidyl transferase domain; PAP/25A-associated; "
TERG_00668	L-galactose dehydrogenase (L-GalDH), putative	cytoplasm													IPR023210;	NADP-dependent oxidoreductase domain;
TERG_00669	Sterol desaturase, putative	plasma membrane	single-organism process; metabolic process; cellular process;	single-organism cellular process; biosynthetic process; primary metabolic process; cellular metabolic process; organic substance metabolic process; single-organism metabolic process;	single-organism biosynthetic process; organic acid biosynthetic process; oxidation-reduction process; small molecule metabolic process; cellular lipid metabolic process; fatty acid metabolic process; fatty acid biosynthetic process; organic substance biosynthetic process; cellular biosynthetic process; lipid biosynthetic process; carboxylic acid biosynthetic process; carboxylic acid metabolic pro…				catalytic activity; binding;	ion binding; oxidoreductase activity;	iron ion binding; transition metal ion binding; metal ion binding; cation binding;	K00227	SC5DL; Delta7-sterol 5-desaturase [EC:1.14.19.20]	ko01130 Biosynthesis of antibiotics; ko00100 Steroid biosynthesis; ko01110 Biosynthesis of secondary metabolites; ko01100 Metabolic pathways;	IPR006694;	Fatty acid hydroxylase;
TERG_00671	hypothetical protein
TERG_00675	hypothetical protein
TERG_00677	hypothetical protein
TERG_00678	NADH-ubiquinone oxidoreductase 21 kDa subunit, putative	mitochondria
TERG_00679	Nuclear thiol peroxidase Dot5, putative	nucleus	metabolic process; single-organism process; cellular process; biological regulation;	regulation of biological quality; regulation of biological process; single-organism metabolic process; single-organism cellular process;	regulation of cellular process; homeostatic process; oxidation-reduction process; cell redox homeostasis; cellular homeostasis;				antioxidant activity; catalytic activity;	oxidoreductase activity;		K03564			IPR000866; IPR012336; IPR013766;	Alkyl hydroperoxide reductase subunit C/ Thiol specific antioxidant; Thioredoxin-like fold; Thioredoxin domain;
TERG_00681	5-oxoprolinase	cytoskeleton							catalytic activity;	hydrolase activity;		K01469	OPLAH; 5-oxoprolinase (ATP-hydrolysing) [EC:3.5.2.9]	ko00480 Glutathione metabolism;	IPR008040;	"Hydantoinaseoxoprolinase, N-terminal; "
TERG_00682	hypothetical protein
TERG_00683	hypothetical protein	nucleus													IPR007330;	MIT;
TERG_00684	hypothetical protein	mitochondria
TERG_00686	Probable Xaa-Pro aminopeptidase pepP	cytoplasm							catalytic activity; binding;	ion binding; hydrolase activity;	peptidase activity; exopeptidase activity; transition metal ion binding; cation binding; peptidase activity, acting on L-amino acid peptides; metal ion binding; aminopeptidase activity; manganese ion binding;	K14213			IPR007865; IPR029149; IPR000994; IPR028980;	"Aminopeptidase P, N-terminal; Creatinase/Aminopeptidase P/Spt16, N-terminal; peptidase M24; Creatinase/Aminopeptidase P, N-terminal; "
TERG_00687	hypothetical protein
TERG_00688	TOR signalling pathway protein TipA, putative	nucleus										K17607
TERG_00689	AUR protein kinase
TERG_00690	Mitochondrial inner membrane protease atp23	nucleus							catalytic activity;	hydrolase activity;	endopeptidase activity; metalloendopeptidase activity; peptidase activity; peptidase activity, acting on L-amino acid peptides; metallopeptidase activity;	K18156
TERG_00691	cystathionine beta-synthase	cytoplasm	single-organism process; metabolic process; cellular process;	biosynthetic process; cellular metabolic process; organic substance metabolic process; single-organism cellular process; nitrogen compound metabolic process; primary metabolic process; single-organism metabolic process;	sulfur amino acid biosynthetic process; organic acid biosynthetic process; organonitrogen compound biosynthetic process; sulfur compound biosynthetic process; sulfur amino acid metabolic process; cellular amino acid metabolic process; alpha-amino acid biosynthetic process; cysteine metabolic process; cysteine biosynthetic process; serine family amino acid biosynthetic process; sulfur compound met…	cell;	cell part;	intracellular part; intracellular; cytoplasm;	catalytic activity;	lyase activity;	hydro-lyase activity; cystathionine beta-synthase activity; carbon-oxygen lyase activity;	K01697	E4.2.1.22; cystathionine beta-synthase [EC:4.2.1.22]	ko00270 Cysteine and methionine metabolism; ko01130 Biosynthesis of antibiotics; ko01230 Biosynthesis of amino acids; ko01100 Metabolic pathways; ko03022 Basal transcription factors;	IPR001926; IPR000644;	Tryptophan synthase beta subunit-like PLP-dependent enzyme; CBS domain;
TERG_00692	SRP receptor beta subunit (Srp102), putative	extracellular										K12272	SRPRB; signal recognition particle receptor subunit beta	ko03060 Protein export;	IPR027417;	P-loop containing nucleoside triphosphate hydrolase;
TERG_00693	hypothetical protein
TERG_00694	glutamate 5-kinase	mitochondria	single-organism process; metabolic process; cellular process;	biosynthetic process; cellular metabolic process; organic substance metabolic process; single-organism cellular process; nitrogen compound metabolic process; primary metabolic process; single-organism metabolic process;	organic acid biosynthetic process; organonitrogen compound biosynthetic process; glutamine family amino acid biosynthetic process; cellular amino acid metabolic process; heterocycle metabolic process; alpha-amino acid biosynthetic process; proline metabolic process; proline biosynthetic process; glutamine family amino acid metabolic process; cellular amino acid biosynthetic process; heterocycle b…	cell;	cell part;	intracellular part; intracellular; cytoplasm;	catalytic activity; binding;	organic cyclic compound binding; heterocyclic compound binding; transferase activity;	phosphotransferase activity, carboxyl group as acceptor; RNA binding; kinase activity; nucleic acid binding; amino acid kinase activity; glutamate 5-kinase activity; transferase activity, transferring phosphorus-containing groups;	K00931	proB; glutamate 5-kinase [EC:2.7.2.11]	ko01130 Biosynthesis of antibiotics; ko00330 Arginine and proline metabolism; ko01230 Biosynthesis of amino acids; ko01100 Metabolic pathways; ko00332 Carbapenem biosynthesis;	IPR015947; IPR001048; IPR002478;	PUA-like domain; Aspartate/glutamate/uridylate kinase; PUA domain;
TERG_00698	hypothetical protein
TERG_00701	hypothetical protein
TERG_00704	Acyl-CoA synthetase, putative	cytoplasm	metabolic process;						catalytic activity;			K01908	prpE; propionyl-CoA synthetase [EC:6.2.1.17]	ko01100 Metabolic pathways; ko00640 Propanoate metabolism;	IPR025110; IPR000873;	AMP-binding enzyme C-terminal domain; AMP-dependent synthetase/ligase;
TERG_00705	Ras small monomeric GTPase RasB	mitochondria	single-organism process; signaling; response to stimulus; cellular process; biological regulation;	single organism signaling; cellular response to stimulus; regulation of biological process; cell communication;	regulation of cellular process; signal transduction; intracellular signal transduction; small GTPase mediated signal transduction;	membrane;			binding;	ion binding; organic cyclic compound binding; heterocyclic compound binding; carbohydrate derivative binding; small molecule binding;	nucleoside phosphate binding; nucleoside binding; nucleotide binding; ribonucleoside binding; ribonucleotide binding; purine ribonucleoside binding; anion binding; purine ribonucleotide binding; purine nucleoside binding; guanyl ribonucleotide binding; guanyl nucleotide binding; GTP binding; purine nucleotide binding; purine ribonucleoside triphosphate binding;	K07827	KRAS; GTPase KRas	ko05205 Proteoglycans in cancer; ko05216 Thyroid cancer; ko04726 Serotonergic synapse; ko04912 GnRH signaling pathway; ko04722 Neurotrophin signaling pathway; ko05034 Alcoholism; ko04725 Cholinergic synapse; ko04650 Natural killer cell mediated cytotoxicity; ko04810 Regulation of actin cytoskeleton; ko05219 Bladder cancer; ko04320 Dorso-ventral axis formation; ko05212 Pancreatic cancer; ko04151 P…	IPR005225; IPR027417;	Small GTP-binding protein domain; P-loop containing nucleoside triphosphate hydrolase;
TERG_00706	hypothetical protein
TERG_00707	hypothetical protein
TERG_00708	Serine hydroxymethyltransferase	mitochondria	single-organism process; metabolic process; cellular process;	single-organism cellular process; nitrogen compound metabolic process; primary metabolic process; cellular metabolic process; organic substance metabolic process; single-organism metabolic process;	small molecule metabolic process; glycine metabolic process; alpha-amino acid metabolic process; cellular amino acid metabolic process; serine family amino acid metabolic process; L-serine metabolic process; carboxylic acid metabolic process; organic acid metabolic process; oxoacid metabolic process; organonitrogen compound metabolic process;				catalytic activity; binding;	organic cyclic compound binding; heterocyclic compound binding; ion binding; cofactor binding; transferase activity;	glycine hydroxymethyltransferase activity; transferase activity, transferring one-carbon groups; anion binding; hydroxymethyl-, formyl- and related transferase activity; pyridoxal phosphate binding;	K00600	glyA; glycine hydroxymethyltransferase [EC:2.1.2.1]	ko01130 Biosynthesis of antibiotics; ko00670 One carbon pool by folate; ko01110 Biosynthesis of secondary metabolites; ko01230 Biosynthesis of amino acids; ko01100 Metabolic pathways; ko00460 Cyanoamino acid metabolism; ko00680 Methane metabolism; ko01120 Microbial metabolism in diverse environments; ko01200 Carbon metabolism; ko03022 Basal transcription factors; ko00630 Glyoxylate and dicarboxyl…	IPR015424; IPR015422; IPR015421;	"Pyridoxal phosphate-dependent transferase; Pyridoxal phosphate-dependent transferase, major region, subdomain 2; Pyridoxal phosphate-dependent transferase, major region, subdomain 1; "
TERG_00709	MC domain protein	mitochondria							catalytic activity; binding;	organic cyclic compound binding; heterocyclic compound binding; ion binding; cofactor binding;	molybdenum ion binding; transition metal ion binding; metal ion binding; cation binding; anion binding; pyridoxal phosphate binding;				IPR011037; IPR005303; IPR005302;	"Pyruvate kinase-like, insert domain; MOSC, N-terminal beta barrel; Molybdenum cofactor sulfurase, C-terminal; "
TERG_00710	hypothetical protein
TERG_00711	Patatin-like serine hydrolase, putative	mitochondria	single-organism process; metabolic process;	primary metabolic process; single-organism metabolic process; organic substance metabolic process;	lipid metabolic process;										IPR016035; IPR002641;	Acyl transferase/acyl hydrolase/lysophospholipase; Patatin/Phospholipase A2-related;
TERG_00712	hypothetical protein
TERG_00713	hypothetical protein
TERG_00724	C6 finger domain protein, putative	nucleus	biological regulation;	regulation of biological process;	regulation of cellular process; regulation of gene expression; regulation of transcription, DNA-templated; regulation of cellular biosynthetic process; regulation of primary metabolic process; regulation of macromolecule metabolic process; regulation of nucleobase-containing compound metabolic process; regulation of macromolecule biosynthetic process; regulation of cellular metabolic process; reg…	organelle; cell;	cell part; membrane-bounded organelle;	intracellular membrane-bounded organelle; intracellular organelle; nucleus; intracellular; intracellular part;	binding; nucleic acid binding transcription factor activity;	ion binding; transcription factor activity, sequence-specific DNA binding;	RNA polymerase II transcription factor activity, sequence-specific DNA binding; transition metal ion binding; metal ion binding; cation binding; zinc ion binding;				IPR001138;	Zn(2)-C6 fungal-type DNA-binding domain;
TERG_00725	hypothetical protein
TERG_00726	hypothetical protein
TERG_00727	Involucrin repeat protein, putative	nucleus
TERG_00731	hypothetical protein
TERG_00733	hypothetical protein	nucleus
TERG_00734	isoaspartyl dipeptidase	cytoplasm	metabolic process; asparagine catabolic process			cytoplasm			catalytic activity;asparaginase activity
TERG_00735	hypothetical protein
TERG_00736	hypothetical protein
TERG_00739	ubiquitin-like protein 1
TERG_00741	WD repeat protein	cytoplasm							binding;	protein binding;					IPR017986; IPR022033; IPR015943;	WD40-repeat-containing domain; RAVE complex protein Rav1 C-terminal; WD40/YVTN repeat-like-containing domain;
TERG_00745	Suppressor of yeast profilin deletion	nucleus										K20042			IPR018808;	Muniscin C-terminal;
TERG_00746	hypothetical protein
TERG_00749	hypothetical protein
TERG_00756	hypothetical protein
TERG_00759	Conidiophore development protein HymA	mitochondria							binding;			K08272	CAB39; calcium binding protein 39	ko04150 mTOR signaling pathway; ko04152 AMPK signaling pathway;	IPR011989; IPR016024;	Armadillo-like helical; Armadillo-type fold;
TERG_00762	Vesicular fusion ATPase, putative	cytoplasm							binding;	ion binding; organic cyclic compound binding; heterocyclic compound binding; carbohydrate derivative binding; small molecule binding;	ATP binding; nucleoside phosphate binding; nucleoside binding; nucleotide binding; ribonucleoside binding; ribonucleotide binding; purine ribonucleoside binding; anion binding; purine ribonucleotide binding; adenyl ribonucleotide binding; adenyl nucleotide binding; purine nucleoside binding; purine nucleotide binding; purine ribonucleoside triphosphate binding;	K06027	NSF; vesicle-fusing ATPase [EC:3.6.4.6]	ko04721 Synaptic vesicle cycle; ko04727 GABAergic synapse; ko04962 Vasopressin-regulated water reabsorption;	IPR029067; IPR003593; IPR003959; IPR009010; IPR004201; IPR027417;	"CDC48 domain 2-like; AAA+ ATPase domain; ATPase, AAA-type, core; Aspartate decarboxylase-like domain; CDC48, domain 2; P-loop containing nucleoside triphosphate hydrolase; "
TERG_00763	hypothetical protein
TERG_00765	hypothetical protein
TERG_00766	Sensor histidine kinase/response regulator, putative	nucleus	single-organism process; signaling; response to stimulus; metabolic process; cellular process; biological regulation;	single organism signaling; cellular response to stimulus; cellular metabolic process; regulation of biological process; cell communication;	regulation of cellular process; phosphorylation; intracellular signal transduction; phosphorelay signal transduction system; phosphate-containing compound metabolic process; signal transduction; phosphorus metabolic process;				molecular transducer activity; catalytic activity; signal transducer activity;	receptor activity; transferase activity;	signaling receptor activity; kinase activity; phosphotransferase activity, alcohol group as acceptor; protein histidine kinase activity; phosphorelay sensor kinase activity; protein kinase activity; phosphotransferase activity, nitrogenous group as acceptor; transferase activity, transferring phosphorus-containing groups;				IPR005467; IPR000014; IPR000700; IPR013656; IPR003661; IPR003594; IPR004358;	"Histidine kinase domain; PAS domain; PAS-associated, C-terminal; PAS fold-4; Signal transduction histidine kinase, dimerisation/phosphoacceptor domain; Histidine kinase-like ATPase, C-terminal domain; Signal transduction histidine kinase-related protein, C-terminal; "
TERG_00767	hypothetical protein
TERG_00768	serine/threonine protein kinase	plasma membrane	single-organism process; signaling; response to stimulus; metabolic process; cellular process; biological regulation;	single organism signaling; cellular response to stimulus; primary metabolic process; cellular metabolic process; organic substance metabolic process; regulation of biological process; cell communication;	regulation of cellular process; phosphorylation; intracellular signal transduction; cellular protein metabolic process; phosphorelay signal transduction system; phosphate-containing compound metabolic process; signal transduction; protein phosphorylation; phosphorus metabolic process; cellular macromolecule metabolic process; cellular protein modification process; macromolecule metabolic process;…				signal transducer activity; catalytic activity; binding; molecular transducer activity;	protein binding; heterocyclic compound binding; organic cyclic compound binding; transferase activity; ion binding; carbohydrate derivative binding; receptor activity; small molecule binding;	nucleoside phosphate binding; phosphotransferase activity, alcohol group as acceptor; protein kinase activity; phosphotransferase activity, nitrogenous group as acceptor; kinase activity; ribonucleotide binding; purine ribonucleoside binding; phosphorelay sensor kinase activity; anion binding; adenyl ribonucleotide binding; adenyl nucleotide binding; purine nucleotide binding; purine ribonucleosi…				IPR005467; IPR011990; IPR027417; IPR003594; IPR011009; IPR011006; IPR000719; IPR029016; IPR001789; IPR003661; IPR004358; IPR003018;	"Histidine kinase domain; Tetratricopeptide-like helical domain; P-loop containing nucleoside triphosphate hydrolase; Histidine kinase-like ATPase, C-terminal domain; Protein kinase-like domain; CheY-like superfamily; Protein kinase domain; GAF domain-like; Signal transduction response regulator, receiver domain; Signal transduction histidine kinase, dimerisation/phosphoacceptor domain; Signal tr…
TERG_00770	hypothetical protein
TERG_00773	hypothetical protein
TERG_00775	Peroxisomal AMP binding enzyme, putative	cytoplasm	metabolic process;						catalytic activity;						IPR000873;	AMP-dependent synthetase/ligase;
TERG_00780	hypothetical protein	mitochondria
TERG_00782	TPR domain protein	mitochondria							binding;	protein binding;					IPR011990;	Tetratricopeptide-like helical domain;
TERG_00784	succinate dehydrogenase assembly factor 2, mitochondrial	mitochondria	metabolic process; cellular process;	primary metabolic process; cellular metabolic process; organic substance metabolic process;	cellular macromolecule metabolic process; cellular protein metabolic process; cellular protein modification process; macromolecule metabolic process; protein metabolic process; protein modification process; macromolecule modification; protein-FAD linkage; protein-cofactor linkage;	organelle; cell;	cell part; membrane-bounded organelle;	intracellular membrane-bounded organelle; intracellular organelle; intracellular; cytoplasm; intracellular part; mitochondrion; cytoplasmic part;
TERG_00786	hypothetical protein	nucleus
TERG_00789	hypothetical protein
TERG_00791	hypothetical protein
TERG_00792	hypothetical protein	mitochondria				membrane;			electron carrier activity; catalytic activity;	oxidoreductase activity;	oxidoreductase activity, acting on NAD(P)H; NADH dehydrogenase activity; NADH dehydrogenase (quinone) activity; NADH dehydrogenase (ubiquinone) activity; oxidoreductase activity, acting on NAD(P)H, quinone or similar compound as acceptor;	K18160			IPR029058;	Alpha/Beta hydrolase fold;
TERG_00796	hypothetical protein
TERG_00798	hypothetical protein
TERG_00799	HAD superfamily hydrolase, putative	mitochondria													IPR023214;	HAD-like domain;
TERG_00800	hypothetical protein	nucleus													IPR002575; IPR011009;	Aminoglycoside phosphotransferase; Protein kinase-like domain;
TERG_00802	hypothetical protein	nucleus
TERG_00804	hypothetical protein
TERG_00805	hypothetical protein
TERG_00806	hypothetical protein
TERG_00807	hypothetical protein
TERG_00808	actin-like protein	cytoskeleton										K16575
TERG_00809	hypothetical protein
TERG_00810	37S ribosomal protein Rsm24, putative	mitochondria										K17413			IPR019349;	"Ribosomal protein S24/S35, mitochondrial, conserved domain; "
TERG_00811	hypothetical protein
TERG_00814	SNF2 family helicase/ATPase, putative	nucleus	cellular process; cellular component organization or biogenesis;	cellular component organization;	chromatin remodeling; chromosome organization; organelle organization; chromatin organization; ATP-dependent chromatin remodeling;	organelle; cell;	cell part; membrane-bounded organelle;	intracellular membrane-bounded organelle; intracellular organelle; nucleus; intracellular; intracellular part;	catalytic activity; binding;	macromolecular complex binding; ion binding; hydrolase activity; chromatin binding; heterocyclic compound binding; organic cyclic compound binding; carbohydrate derivative binding; small molecule binding;	DNA binding; ATP binding; nucleoside phosphate binding; nucleoside binding; hydrolase activity, acting on acid anhydrides; nucleotide binding; ribonucleoside binding; ribonucleotide binding; nucleic acid binding; purine ribonucleoside binding; nucleosome binding; anion binding; purine ribonucleotide binding; adenyl ribonucleotide binding; adenyl nucleotide binding; purine nucleoside binding; hydr…	K11654			IPR001005; IPR015194; IPR015195; IPR009057; IPR027417; IPR014001; IPR001650; IPR017884; IPR000330;	"SANT/Myb domain; ISWI, HAND domain; SLIDE domain; Homeobox domain-like; P-loop containing nucleoside triphosphate hydrolase; Helicase superfamily 1/2, ATP-binding domain; Helicase, C-terminal; SANT domain; SNF2-related, N-terminal domain; "
TERG_00815	hypothetical protein
TERG_00816	hypothetical protein
TERG_00819	hypothetical protein	nucleus	cellular process; cellular component organization or biogenesis;	cellular component organization;	chromosome condensation; DNA packaging; chromosome organization; organelle organization; DNA conformation change;				binding;	organic cyclic compound binding; heterocyclic compound binding;	DNA binding; nucleic acid binding;
TERG_00823	Short chain dehydrogenase/reductase family	cytoplasm							catalytic activity;	oxidoreductase activity;					IPR016040;	NAD(P)-binding domain;
TERG_00828	hypothetical protein
TERG_00830	Cytochrome P450 monooxygenase, putative	plasma membrane	single-organism process; metabolic process;	single-organism metabolic process;	oxidation-reduction process;				catalytic activity; binding;	organic cyclic compound binding; heterocyclic compound binding; ion binding; oxidoreductase activity;	heme binding; iron ion binding; transition metal ion binding; cation binding; metal ion binding; oxidoreductase activity, acting on paired donors, with incorporation or reduction of molecular oxygen; monooxygenase activity; tetrapyrrole binding;
TERG_00831	gamma-glutamyltransferase	mitochondria	metabolic process; cellular process;	nitrogen compound metabolic process; cellular metabolic process; organic substance metabolic process;	sulfur compound metabolic process; peptide metabolic process; cellular modified amino acid metabolic process; glutathione metabolic process; cellular nitrogen compound metabolic process; cellular amide metabolic process; organonitrogen compound metabolic process;				catalytic activity;	transferase activity;	gamma-glutamyltransferase activity; transferase activity, transferring acyl groups; transferase activity, transferring amino-acyl groups;	K00681	ggt; gamma-glutamyltranspeptidase / glutathione hydrolase [EC:2.3.2.2 3.4.19.13]	ko00430 Taurine and hypotaurine metabolism; ko00480 Glutathione metabolism; ko01100 Metabolic pathways; ko00460 Cyanoamino acid metabolism;	IPR029055;	"Nucleophile aminohydrolases, N-terminal; "
TERG_00832	CMGC/MAPK/ERK1 protein kinase	nucleus	metabolic process; cellular process;	primary metabolic process; cellular metabolic process; organic substance metabolic process;	phosphorylation; cellular protein metabolic process; phosphate-containing compound metabolic process; protein phosphorylation; phosphorus metabolic process; cellular macromolecule metabolic process; cellular protein modification process; protein metabolic process; macromolecule metabolic process; protein modification process; macromolecule modification;				signal transducer activity; catalytic activity; binding;	ion binding; organic cyclic compound binding; heterocyclic compound binding; signal transducer activity, downstream of receptor; carbohydrate derivative binding; transferase activity; small molecule binding;	ATP binding; nucleoside phosphate binding; phosphotransferase activity, alcohol group as acceptor; nucleoside binding; protein kinase activity; nucleotide binding; signal transducer, downstream of receptor, with serine/threonine kinase activity; MAP kinase activity; ribonucleoside binding; kinase activity; ribonucleotide binding; purine ribonucleoside binding; protein serine/threonine kinase acti…	K04464	MAPK7; mitogen-activated protein kinase 7 [EC:2.7.11.24]	ko04139 Regulation of mitophagy - yeast; ko04912 GnRH signaling pathway; ko05206 MicroRNAs in cancer; ko04722 Neurotrophin signaling pathway; ko04921 Oxytocin signaling pathway; ko04011 MAPK signaling pathway - yeast; ko04540 Gap junction; ko04010 MAPK signaling pathway;	IPR000719; IPR011009;	Protein kinase domain; Protein kinase-like domain;
TERG_00834	60S ribosomal protein L24b	nucleus										K02896	RP-L24e; large subunit ribosomal protein L24e	ko03010 Ribosome;	IPR011017;	TRASH domain;
TERG_00835	hypothetical protein
TERG_00836	QDE-2-interacting protein	nucleus	miRNA-processing			nucleus			binding; metal ion binding; nucleic acid binding
TERG_00840	hypothetical protein
TERG_00841	C6 transcription factor (Mut3), putative	nucleus	metabolic process; cellular process; biological regulation;	biosynthetic process; cellular metabolic process; organic substance metabolic process; nitrogen compound metabolic process; primary metabolic process; regulation of biological process;	regulation of cellular process; cellular aromatic compound metabolic process; nucleic acid-templated transcription; regulation of macromolecule metabolic process; regulation of nucleobase-containing compound metabolic process; regulation of RNA biosynthetic process; heterocycle metabolic process; nucleobase-containing compound metabolic process; aromatic compound biosynthetic process; regulation …	organelle; cell;	cell part; membrane-bounded organelle;	intracellular membrane-bounded organelle; intracellular organelle; nucleus; intracellular; intracellular part;	binding; nucleic acid binding transcription factor activity;	organic cyclic compound binding; heterocyclic compound binding; ion binding; transcription factor activity, sequence-specific DNA binding;	DNA binding; RNA polymerase II transcription factor activity, sequence-specific DNA binding; transition metal ion binding; nucleic acid binding; cation binding; metal ion binding; zinc ion binding;				IPR001138; IPR007219;	"Zn(2)-C6 fungal-type DNA-binding domain; Transcription factor domain, fungi; "
TERG_00845	hypothetical protein
TERG_00846	Protein EFR3	mitochondria
TERG_00847	hypothetical protein
TERG_00848	hypothetical protein	nucleus
TERG_00849	hypothetical protein
TERG_00850	hypothetical protein
TERG_00851	Ankyrin repeat protein	nucleus							binding;	protein binding;					IPR020683;	Ankyrin repeat-containing domain;
TERG_00852	hypothetical protein
TERG_00853	choline transporter	membrane	choline transport			membrane			choline transmembrane transporter activity
TERG_00860	LRP16 family protein	mitochondria													IPR002589;	Macro domain;
TERG_00861	hypothetical protein
TERG_00863	Sexual development transcription factor NsdD	nucleus
TERG_00865	hypothetical protein	cyto_nucl
TERG_00867	hypothetical protein
TERG_00872	hypothetical protein
TERG_00873	hypothetical protein
TERG_00874	hypothetical protein
TERG_00875	glutamate-cysteine ligase	cytoplasm	metabolic process; cellular process;	nitrogen compound metabolic process; biosynthetic process; cellular metabolic process; organic substance metabolic process;	sulfur compound metabolic process; peptide metabolic process; peptide biosynthetic process; cellular modified amino acid biosynthetic process; cellular amide metabolic process; organonitrogen compound biosynthetic process; organic substance biosynthetic process; cellular biosynthetic process; sulfur compound biosynthetic process; cellular nitrogen compound biosynthetic process; cellular modified …				catalytic activity;	ligase activity;	ligase activity, forming carbon-nitrogen bonds; glutamate-cysteine ligase activity; acid-amino acid ligase activity;	K11204	GCLC; glutamate--cysteine ligase catalytic subunit [EC:6.3.2.2]	ko00270 Cysteine and methionine metabolism; ko04212 Longevity regulating pathway - worm; ko00480 Glutathione metabolism; ko01100 Metabolic pathways;
TERG_00876	hypothetical protein
TERG_00877	CBS domain protein	cytoplasm													IPR000644;	CBS domain;
TERG_00880	Actin filament organization protein App1-like, putative	cytoplasm													IPR019236;	Domain of unknown function DUF2183;
TERG_00881	hypothetical protein
TERG_00882	Golgi phosphoprotein 3 (GPP34) domain containing protein	mitochondria							binding;	lipid binding; ion binding;	phosphatidylinositol phosphate binding; anion binding; phosphatidylinositol-4-phosphate binding; phospholipid binding; phosphatidylinositol binding;	K15620	GOLPH3; golgi phosphoprotein 3	ko05202 Transcriptional misregulation in cancer;
TERG_00883	acyl carrier protein
TERG_00884	NADH-ubiquinone oxidoreductase 23 kDa subunit, mitochondrial	mitochondria	single-organism process; metabolic process;	single-organism metabolic process;	oxidation-reduction process;	membrane;			catalytic activity; binding;	oxidoreductase activity; metal cluster binding;	oxidoreductase activity, acting on NAD(P)H; iron-sulfur cluster binding; 4 iron, 4 sulfur cluster binding;	K03941	NDUFS8; NADH dehydrogenase (ubiquinone) Fe-S protein 8 [EC:1.6.5.3 1.6.99.3]	ko05010 Alzheimer's disease; ko00190 Oxidative phosphorylation; ko01100 Metabolic pathways; ko05016 Huntington's disease; ko04932 Non-alcoholic fatty liver disease (NAFLD); ko05012 Parkinson's disease;	IPR017896;	"4Fe-4S ferredoxin-type, iron-sulphur binding domain; "
TERG_00887	hypothetical protein	nucleus
TERG_00889	hypothetical protein
TERG_00890	hypothetical protein
TERG_00891	ribosomal protein S2	cytoplasm	metabolic process; cellular process;	nitrogen compound metabolic process; biosynthetic process; primary metabolic process; cellular metabolic process; organic substance metabolic process;	peptide metabolic process; peptide biosynthetic process; cellular protein metabolic process; cellular amide metabolic process; organonitrogen compound biosynthetic process; organic substance biosynthetic process; cellular biosynthetic process; cellular nitrogen compound biosynthetic process; cellular macromolecule biosynthetic process; cellular macromolecule metabolic process; cellular nitrogen c…	macromolecular complex; cell; organelle;	organelle part; non-membrane-bounded organelle; cell part; ribonucleoprotein complex;	ribosome; intracellular organelle; intracellular non-membrane-bounded organelle; small ribosomal subunit; intracellular organelle part; cytoplasm; intracellular part; ribosomal subunit; intracellular; intracellular ribonucleoprotein complex; cytoplasmic part;	structural molecule activity;	structural constituent of ribosome;		K02967	RP-S2; small subunit ribosomal protein S2	ko03010 Ribosome;	IPR023591;	"Ribosomal protein S2, flavodoxin-like domain; "
TERG_00896	hypothetical protein
TERG_00897	hypothetical protein	plasma membrane
TERG_00899	Neutral/Alkaline nonlysosomal ceramidase, putative	extracellular										K12349	ASAH2; neutral ceramidase [EC:3.5.1.23]	ko00600 Sphingolipid metabolism; ko01100 Metabolic pathways; ko04071 Sphingolipid signaling pathway;	IPR031329; IPR031331;	"Neutral/Alkaline non-lysosomal ceramidase, N-terminal; Neutral/Alkaline non-lysosomal ceramidase, C-terminal; "
TERG_00901	hypothetical protein
TERG_00902	hypothetical protein
TERG_00905	hypothetical protein
TERG_00906	cAMP-dependent protein kinase regulatory subunit	mitochondria	biological regulation;	regulation of biological process;	regulation of cellular process; regulation of phosphorylation; regulation of phosphorus metabolic process; regulation of cellular protein metabolic process; regulation of primary metabolic process; regulation of macromolecule metabolic process; regulation of protein metabolic process; regulation of protein modification process; regulation of protein phosphorylation; regulation of metabolic proces…	macromolecular complex; cell;	cell part;	intracellular part; intracellular; cAMP-dependent protein kinase complex;	molecular function regulator;	enzyme regulator activity;	cAMP-dependent protein kinase regulator activity; kinase regulator activity; protein kinase regulator activity;	K04739	PRKAR; cAMP-dependent protein kinase regulator	ko04910 Insulin signaling pathway;	IPR000595; IPR018490; IPR014710;	Cyclic nucleotide-binding domain; Cyclic nucleotide-binding-like; RmlC-like jelly roll fold;
TERG_00908	hypothetical protein	nucleus													IPR014756; IPR032640;	"Immunoglobulin E-set; AMP-activated protein kinase, glycogen-binding domain; "
TERG_00909	hypothetical protein	mitochondria
TERG_00910	hypothetical protein
TERG_00912	hypothetical protein
TERG_00915	CAMK protein kinase
TERG_00919	Phospholipid:diacylglycerol acyltransferase, putative	plasma membrane	single-organism process; metabolic process;	primary metabolic process; single-organism metabolic process; organic substance metabolic process;	lipid metabolic process;				catalytic activity;	transferase activity;	transferase activity, transferring acyl groups; transferase activity, transferring acyl groups other than amino-acyl groups; O-acyltransferase activity;	K00679	E2.3.1.158; phospholipid:diacylglycerol acyltransferase [EC:2.3.1.158]	ko00561 Glycerolipid metabolism;	IPR029058;	Alpha/Beta hydrolase fold;
TERG_00921	hypothetical protein	mitochondria
TERG_00922	hypothetical protein
TERG_00923	hypothetical protein
TERG_00924	Phosphatidylinositol transporter, putative	cytoplasm	localization;	establishment of localization;	transport;	cell;	cell part;	intracellular;	transporter activity;						IPR001251; IPR011074;	"CRAL-TRIO lipid binding domain; CRAL/TRIO, N-terminal domain; "
TERG_00925	GTPase activating protein Sar1, putative	nucleus	single-organism process; signaling; response to stimulus; cellular process; biological regulation;	single organism signaling; cellular response to stimulus; regulation of biological process; cell communication; regulation of molecular function;	regulation of cellular process; signal transduction; regulation of hydrolase activity; regulation of catalytic activity; regulation of GTPase activity;				binding;	protein binding;		K05767	IQGAP2_3; Ras GTPase-activating-like protein IQGAP2/3	ko04810 Regulation of actin cytoskeleton;	IPR001936; IPR000593; IPR008936;	"Ras GTPase-activating protein; RasGAP protein, C-terminal; Rho GTPase activation protein; "
TERG_00926	Exosome complex exonuclease Rrp6, putative	nucleus	metabolic process; cellular process;	nitrogen compound metabolic process; primary metabolic process; cellular metabolic process; organic substance metabolic process;	RNA processing; cellular aromatic compound metabolic process; organic cyclic compound metabolic process; RNA metabolic process; nucleic acid metabolic process; heterocycle metabolic process; nucleobase-containing compound metabolic process; cellular macromolecule metabolic process; gene expression; cellular nitrogen compound metabolic process; macromolecule metabolic process;	macromolecular complex; cell; membrane-enclosed lumen; organelle;	organelle part; catalytic complex; cell part; membrane-bounded organelle;	intracellular organelle; nuclear exosome (RNase complex); intracellular organelle part; nuclear lumen; intracellular part; intracellular membrane-bounded organelle; exoribonuclease complex; nucleus; intracellular organelle lumen; intracellular; organelle lumen; nuclear part; exosome (RNase complex);	catalytic activity; binding;	organic cyclic compound binding; heterocyclic compound binding; hydrolase activity; small molecule binding;	nucleoside phosphate binding; hydrolase activity, acting on ester bonds; nuclease activity; nucleic acid binding; exonuclease activity; 3'-5' exonuclease activity; nucleotide binding;	K12591	RRP6; exosome complex exonuclease RRP6 [EC:3.1.13.-]	ko03018 RNA degradation;	IPR012588; IPR010997; IPR012337; IPR002562; IPR002121;	"Exosome-associated factor Rrp6, N-terminal; HRDC-like; Ribonuclease H-like domain; 3'-5' exonuclease domain; HRDC domain; "
TERG_00927	hypothetical protein
TERG_00928	hypothetical protein
TERG_00929	hypothetical protein
TERG_00931	hypothetical protein
TERG_00932	C2H2 transcription factor, putative	nucleus							binding;	organic cyclic compound binding; heterocyclic compound binding; ion binding;	nucleic acid binding; cation binding; metal ion binding;				IPR007087; IPR013087;	"Zinc finger, C2H2; Zinc finger C2H2-type/integrase DNA-binding domain; "
TERG_00934	Golgi transport complex component Cog5, putative	cytoplasm	localization;	establishment of localization;	transport; Golgi vesicle transport; intra-Golgi vesicle-mediated transport; vesicle-mediated transport;	macromolecular complex; cell; organelle;	organelle part; cell part; membrane-bounded organelle; protein complex; tethering complex;	intracellular organelle; cytoplasm; intracellular organelle part; endomembrane system; intracellular part; intracellular membrane-bounded organelle; intracellular; Golgi apparatus part; Golgi transport complex; Golgi apparatus; cytoplasmic part;
TERG_00936	hypothetical protein
TERG_00937	Cytochrome c oxidase assembly factor 6	nucleus				organelle; cell;	cell part; membrane-bounded organelle;	intracellular membrane-bounded organelle; intracellular organelle; intracellular; cytoplasm; intracellular part; mitochondrion; cytoplasmic part;	electron carrier activity; catalytic activity; transporter activity;	substrate-specific transporter activity; oxidoreductase activity; transmembrane transporter activity;	ion transmembrane transporter activity; monovalent inorganic cation transmembrane transporter activity; oxidoreductase activity, acting on a heme group of donors, oxygen as acceptor; oxidoreductase activity, acting on a heme group of donors; hydrogen ion transmembrane transporter activity; heme-copper terminal oxidase activity; substrate-specific transmembrane transporter activity; cytochrome-c o…	K18179
TERG_00938	RNA-binding protein (Nab3), putative	nucleus							binding;	organic cyclic compound binding; heterocyclic compound binding; small molecule binding;	RNA binding; nucleoside phosphate binding; nucleic acid binding; nucleotide binding;				IPR000504; IPR004154; IPR012677; IPR034167;	"RNA recognition motif domain; Anticodon-binding; Nucleotide-binding alpha-beta plait domain; Nab3, RNA recognition motif; "
TERG_00939	Peptidyl-tRNA hydrolase domain protein	mitochondria	single-organism process; metabolic process; cellular process; cellular component organization or biogenesis;	cellular component organization; biosynthetic process; cellular metabolic process; organic substance metabolic process; single-organism cellular process; nitrogen compound metabolic process; primary metabolic process;	peptide metabolic process; cellular protein metabolic process; organonitrogen compound biosynthetic process; protein complex disassembly; cellular protein complex disassembly; cellular nitrogen compound metabolic process; protein metabolic process; macromolecule metabolic process; macromolecule biosynthetic process; translation; protein complex subunit organization; peptide biosynthetic process; …				binding;	organic cyclic compound binding; heterocyclic compound binding;	translation termination factor activity; RNA binding; translation factor activity, RNA binding; nucleic acid binding; translation release factor activity;	K15033			IPR000352;	Peptide chain release factor class I/class II;
TERG_00940	rRNA processing protein Utp6, putative	nucleus	metabolic process; cellular process; cellular component organization or biogenesis;	cellular component biogenesis; nitrogen compound metabolic process; primary metabolic process; cellular metabolic process; organic substance metabolic process;	rRNA metabolic process; ncRNA processing; RNA processing; ribonucleoprotein complex biogenesis; cellular aromatic compound metabolic process; ribosomal small subunit biogenesis; ribosome biogenesis; organic cyclic compound metabolic process; RNA metabolic process; maturation of SSU-rRNA from tricistronic rRNA transcript (SSU-rRNA, 5.8S rRNA, LSU-rRNA); nucleic acid metabolic process; heterocycle …				binding;	organic cyclic compound binding; heterocyclic compound binding; protein binding;	snoRNA binding; RNA binding; nucleic acid binding;	K14557	UTP6; U3 small nucleolar RNA-associated protein 6	ko03008 Ribosome biogenesis in eukaryotes;	IPR011990;	Tetratricopeptide-like helical domain;
TERG_00942	hypothetical protein	cytoplasm
TERG_00943	hypothetical protein
TERG_00946	Asparaginyl-tRNA synthetase Slm5, putative	cytoskeleton	single-organism process; metabolic process; cellular process;	biosynthetic process; cellular metabolic process; organic substance metabolic process; single-organism cellular process; nitrogen compound metabolic process; primary metabolic process; single-organism metabolic process;	peptide metabolic process; cellular aromatic compound metabolic process; cellular protein metabolic process; organonitrogen compound biosynthetic process; tRNA aminoacylation; cellular amino acid metabolic process; heterocycle metabolic process; nucleobase-containing compound metabolic process; cellular nitrogen compound metabolic process; tRNA aminoacylation for protein translation; protein meta…				catalytic activity; binding;	ligase activity; ion binding; organic cyclic compound binding; heterocyclic compound binding; carbohydrate derivative binding; small molecule binding;	ligase activity, forming aminoacyl-tRNA and related compounds; ATP binding; nucleoside phosphate binding; ligase activity, forming carbon-oxygen bonds; nucleoside binding; nucleotide binding; ribonucleoside binding; ribonucleotide binding; purine ribonucleoside binding; anion binding; purine ribonucleotide binding; adenyl ribonucleotide binding; adenyl nucleotide binding; purine nucleoside bindin…	K01893	NARS; asparaginyl-tRNA synthetase [EC:6.1.1.22]	ko00970 Aminoacyl-tRNA biosynthesis;	IPR004364;	"Aminoacyl-tRNA synthetase, class II (D/K/N); "
TERG_00949	Camp independent regulatory protein	nucleus
TERG_00953	hypothetical protein
TERG_00954	hypothetical protein
TERG_00957	Sec23/Sec24 family protein	nucleus	localization;	macromolecule localization; establishment of localization; cellular localization;	establishment of protein localization; transport; intracellular transport; cellular macromolecule localization; establishment of localization in cell; vesicle-mediated transport; intracellular protein transport; Golgi vesicle transport; organic substance transport; protein localization; cellular protein localization; ER to Golgi vesicle-mediated transport; protein transport;	membrane; macromolecular complex; cell; organelle;	organelle part; membrane part; cell part; whole membrane; membrane-bounded organelle; coated membrane; protein complex;	transport vesicle membrane; cytoplasmic vesicle; organelle membrane; membrane protein complex; cytoplasm; vesicle; cytoplasmic vesicle part; intracellular part; vesicle coat; coated vesicle membrane; intracellular; ER to Golgi transport vesicle membrane; intracellular organelle; intracellular vesicle; bounding membrane of organelle; intracellular organelle part; ER to Golgi transport vesicle; end…	binding;	ion binding;	cation binding; metal ion binding; zinc ion binding; transition metal ion binding;	K14007	SEC24; protein transport protein SEC24	ko04141 Protein processing in endoplasmic reticulum;	IPR006900; IPR012990; IPR006896; IPR029006; IPR006895; IPR007123; IPR002035;	"Sec23/Sec24, helical domain; Sec23/Sec24 beta-sandwich; Sec23/Sec24, trunk domain; ADF-H/Gelsolin-like domain; Zinc finger, Sec23/Sec24-type; Gelsolin-like domain; von Willebrand factor, type A; "
TERG_00960	hypothetical protein
TERG_00963	hypothetical protein
TERG_00964	Cytochrome c oxidase protein 20, mitochondrial	nucleus										K18184
TERG_00965	DNA polymerase epsilon catalytic subunit A	nucleus	metabolic process; cellular process;	nitrogen compound metabolic process; biosynthetic process; primary metabolic process; cellular metabolic process; organic substance metabolic process;	DNA replication; cellular aromatic compound metabolic process; DNA metabolic process; organic cyclic compound metabolic process; organic substance biosynthetic process; cellular biosynthetic process; cellular macromolecule biosynthetic process; nucleic acid metabolic process; heterocycle metabolic process; nucleobase-containing compound metabolic process; cellular macromolecule metabolic process;…	organelle; cell;	cell part; membrane-bounded organelle;	intracellular membrane-bounded organelle; intracellular organelle; nucleus; intracellular; intracellular part;	catalytic activity; binding;	ion binding; hydrolase activity; heterocyclic compound binding; organic cyclic compound binding; transferase activity; small molecule binding;	DNA binding; nucleoside phosphate binding; 3'-5' exonuclease activity; nucleotide binding; zinc ion binding; transition metal ion binding; nucleotidyltransferase activity; nuclease activity; hydrolase activity, acting on ester bonds; nucleic acid binding; DNA polymerase activity; cation binding; metal ion binding; exonuclease activity; DNA-directed DNA polymerase activity; transferase activity, t…	K02324	POLE1; DNA polymerase epsilon subunit 1 [EC:2.7.7.7]	ko03410 Base excision repair; ko00230 Purine metabolism; ko03030 DNA replication; ko01100 Metabolic pathways; ko00240 Pyrimidine metabolism; ko05166 HTLV-I infection; ko03420 Nucleotide excision repair;	IPR006133; IPR013697; IPR012337; IPR006134;	"DNA-directed DNA polymerase, family B, exonuclease domain; DNA polymerase epsilon, catalytic subunit A, C-terminal; Ribonuclease H-like domain; DNA-directed DNA polymerase, family B, multifunctional domain; "
TERG_00966	CAMK/CAMK1 protein kinase	cyto_nucl	metabolic process; cellular process;	primary metabolic process; cellular metabolic process; organic substance metabolic process;	phosphorylation; cellular protein metabolic process; phosphate-containing compound metabolic process; protein phosphorylation; phosphorus metabolic process; cellular macromolecule metabolic process; cellular protein modification process; protein metabolic process; macromolecule metabolic process; protein modification process; macromolecule modification;				catalytic activity; binding;	ion binding; organic cyclic compound binding; heterocyclic compound binding; carbohydrate derivative binding; transferase activity; small molecule binding;	ATP binding; nucleoside phosphate binding; phosphotransferase activity, alcohol group as acceptor; nucleoside binding; protein kinase activity; nucleotide binding; ribonucleoside binding; kinase activity; ribonucleotide binding; purine ribonucleoside binding; anion binding; purine ribonucleotide binding; adenyl ribonucleotide binding; adenyl nucleotide binding; purine nucleoside binding; transfer…				IPR000719; IPR011009;	Protein kinase domain; Protein kinase-like domain;
TERG_00968	AMMECR1 family protein	nucleus													IPR027485; IPR002733;	"AMMECR1, N-terminal; AMMECR1 domain; "
TERG_00969	hypothetical protein
TERG_00973	Prefoldin subunit 6, putative	nucleus	cellular process;	protein folding;		macromolecular complex;	protein complex;	prefoldin complex;	binding;	protein binding;	unfolded protein binding;	K04798
TERG_00974	2,3-bisphosphoglycerate-independent phosphoglycerate mutase	cytoplasm	single-organism process; metabolic process;	primary metabolic process; organic substance metabolic process; single-organism metabolic process; catabolic process;	monosaccharide catabolic process; single-organism carbohydrate catabolic process; single-organism catabolic process; small molecule metabolic process; small molecule catabolic process; carbohydrate metabolic process; carbohydrate catabolic process; glucose metabolic process; organic substance catabolic process; single-organism carbohydrate metabolic process; glucose catabolic process; monosacchar…	cell;	cell part;	intracellular part; intracellular; cytoplasm;	catalytic activity; binding;	isomerase activity; ion binding;	transition metal ion binding; intramolecular transferase activity, phosphotransferases; cation binding; metal ion binding; phosphoglycerate mutase activity; intramolecular transferase activity; manganese ion binding;	K15633	"gpmI; 2,3-bisphosphoglycerate-independent phosphoglycerate mutase [EC:5.4.2.12]"""	ko01130 Biosynthesis of antibiotics; ko01110 Biosynthesis of secondary metabolites; ko01230 Biosynthesis of amino acids; ko01100 Metabolic pathways; ko00680 Methane metabolism; ko01120 Microbial metabolism in diverse environments; ko01200 Carbon metabolism; ko00010 Glycolysis / Gluconeogenesis; ko03022 Basal transcription factors;	IPR017849; IPR006124; IPR011258; IPR017850;	"Alkaline phosphatase-like, alpha/beta/alpha; Metalloenzyme; BPG-independent PGAM, N-terminal; Alkaline-phosphatase-like, core domain; "
TERG_00975	hypothetical protein
TERG_00976	serine hydroxymethyltransferase, cytosolic	cytoplasm	single-organism process; metabolic process; cellular process;	single-organism cellular process; nitrogen compound metabolic process; primary metabolic process; cellular metabolic process; organic substance metabolic process; single-organism metabolic process;	small molecule metabolic process; glycine metabolic process; alpha-amino acid metabolic process; cellular amino acid metabolic process; serine family amino acid metabolic process; L-serine metabolic process; carboxylic acid metabolic process; organic acid metabolic process; oxoacid metabolic process; organonitrogen compound metabolic process;				catalytic activity; binding;	organic cyclic compound binding; heterocyclic compound binding; ion binding; cofactor binding; transferase activity;	glycine hydroxymethyltransferase activity; transferase activity, transferring one-carbon groups; anion binding; hydroxymethyl-, formyl- and related transferase activity; pyridoxal phosphate binding;	K00600	glyA; glycine hydroxymethyltransferase [EC:2.1.2.1]	ko01130 Biosynthesis of antibiotics; ko00670 One carbon pool by folate; ko01110 Biosynthesis of secondary metabolites; ko01230 Biosynthesis of amino acids; ko01100 Metabolic pathways; ko00460 Cyanoamino acid metabolism; ko00680 Methane metabolism; ko01120 Microbial metabolism in diverse environments; ko01200 Carbon metabolism; ko03022 Basal transcription factors; ko00630 Glyoxylate and dicarboxyl…	IPR015424; IPR015422; IPR015421;	"Pyridoxal phosphate-dependent transferase; Pyridoxal phosphate-dependent transferase, major region, subdomain 2; Pyridoxal phosphate-dependent transferase, major region, subdomain 1; "
TERG_00977	hypothetical protein
TERG_00980	hypothetical protein
TERG_00981	hypothetical protein	nucleus
TERG_00983	eukaryotic translation initiation factor 3 subunit K	cytoplasm	biological regulation;	regulation of biological process;	regulation of cellular process; regulation of gene expression; regulation of cellular biosynthetic process; regulation of primary metabolic process; regulation of macromolecule metabolic process; posttranscriptional regulation of gene expression; regulation of macromolecule biosynthetic process; regulation of cellular metabolic process; regulation of cellular amide metabolic process; regulation o…	macromolecular complex; cell;	cell part; protein complex;	intracellular; cytoplasm; intracellular part; cytoplasmic part; eukaryotic translation initiation factor 3 complex;	binding;	organic cyclic compound binding; heterocyclic compound binding; macromolecular complex binding;	ribosome binding; RNA binding; translation factor activity, RNA binding; nucleic acid binding; translation initiation factor activity; ribonucleoprotein complex binding;	K15028			IPR011991; IPR016020; IPR033464; IPR016024;	"Winged helix-turn-helix DNA-binding domain; Translation initiation factor 3, subunit 12, N-terminal, eukaryotic; CSN8/PSMD8/EIF3K; Armadillo-type fold; "
TERG_00984	PDCD2_C domain protein, putative	nucleus				cell;	cell part;	intracellular part; intracellular; cytoplasm;				K14801			IPR007320;	"Programmed cell death protein 2, C-terminal; "
TERG_00990	sterol 3-beta-glucosyltransferase
TERG_00991	Prefoldin subunit 3	nucleus	cellular process;	protein folding;		macromolecular complex;	protein complex;	prefoldin complex;
TERG_00992	hypothetical protein	plasma membrane
TERG_00993	Allantoinase Dal1, putative	cytoskeleton							catalytic activity;	hydrolase activity;	hydrolase activity, acting on carbon-nitrogen (but not peptide) bonds;	K01466	allB; allantoinase [EC:3.5.2.5]	ko00230 Purine metabolism; ko01120 Microbial metabolism in diverse environments; ko01100 Metabolic pathways;	IPR032466; IPR006680; IPR011059;	"Metal-dependent hydrolase; Amidohydrolase-related; Metal-dependent hydrolase, composite domain; "
TERG_00995	hypothetical protein
TERG_00998	Exosome complex exonuclease Rrp40, putative	nucleus	metabolic process; histone mRNA catabolic process			nucleus			binding; RNA binding; 3'-5'-exoribonuclease activity	organic cyclic compound binding; heterocyclic compound binding;	RNA binding; nucleic acid binding;	K03681	RRP40; exosome complex component RRP40	ko03018 RNA degradation;	IPR012340; IPR004088;	"Nucleic acid-binding, OB-fold; K Homology domain, type 1; "
TERG_00999	hypothetical protein
TERG_01000	hypothetical protein
TERG_01003	hypothetical protein	nucleus
TERG_01004	Extracellular sialidase/neuraminidase, putative	extracellular										K01186	NEU1; sialidase-1 [EC:3.2.1.18]	ko00511 Other glycan degradation; ko00600 Sphingolipid metabolism; ko04142 Lysosome;	IPR011040;	Sialidases;
TERG_01006	Mitotic spindle biogenesis protein Spc19, putative	nucleus	single-organism process; cellular process;	single-organism cellular process;	chromosome segregation; nuclear chromosome segregation; attachment of spindle microtubules to kinetochore; cell cycle process; cell cycle;	macromolecular complex; supramolecular complex; cell; membrane-enclosed lumen; organelle;	organelle part; non-membrane-bounded organelle; cell part; membrane-bounded organelle; supramolecular polymer; protein complex;	DASH complex; microtubule; supramolecular fiber; intracellular part; condensed chromosome outer kinetochore; condensed chromosome kinetochore; chromosomal part; cytoskeleton; condensed chromosome; intracellular organelle lumen; microtubule cytoskeleton; nuclear chromosome part; intracellular; chromosome; kinetochore; organelle lumen; intracellular organelle; polymeric cytoskeletal fiber; intracel…				K11572
TERG_01010	hypothetical protein
TERG_01016	hypothetical protein
TERG_01017	Cytoplasm to vacuole targeting Vps64, putative	nucleus							binding;	protein binding;					IPR008984; IPR000253;	SMAD/FHA domain; Forkhead-associated (FHA) domain;
TERG_01018	Salicylate hydroxylase	extracellular	single-organism process; metabolic process;	single-organism metabolic process;	oxidation-reduction process;				catalytic activity; binding;	organic cyclic compound binding; heterocyclic compound binding; ion binding; cofactor binding; oxidoreductase activity; small molecule binding;	nucleoside phosphate binding; flavin adenine dinucleotide binding; anion binding; nucleotide binding; FAD binding; coenzyme binding;				IPR002938; IPR023753;	FAD-binding domain; FAD/NAD(P)-binding domain;
TERG_01020	Outer spore wall protein RRT8	mitochondria
TERG_01021	hypothetical protein
TERG_01024	Meiotic regulator-interacting protein, putative	nucleus							binding;			K07204	RAPTOR; regulatory associated protein of mTOR	ko04211 Longevity regulating pathway; ko05206 MicroRNAs in cancer; ko04150 mTOR signaling pathway; ko04213 Longevity regulating pathway - multiple species; ko04152 AMPK signaling pathway; ko04910 Insulin signaling pathway; ko04151 PI3K-Akt signaling pathway;	IPR011989; IPR016024; IPR029347;	"Armadillo-like helical; Armadillo-type fold; Raptor, N-terminal CASPase-like domain; "
TERG_01026	Cell polarity protein (Tea1), putative	nucleus							binding;	protein binding;					IPR015915;	Kelch-type beta propeller;
TERG_01027	CK1/CK1/CK1-D protein kinase	cyto_nucl	metabolic process; cellular process;	primary metabolic process; cellular metabolic process; organic substance metabolic process;	phosphorylation; cellular protein metabolic process; phosphate-containing compound metabolic process; protein phosphorylation; phosphorus metabolic process; cellular macromolecule metabolic process; cellular protein modification process; protein metabolic process; macromolecule metabolic process; protein modification process; macromolecule modification;				catalytic activity; binding;	ion binding; organic cyclic compound binding; heterocyclic compound binding; carbohydrate derivative binding; transferase activity; small molecule binding;	ATP binding; nucleoside phosphate binding; phosphotransferase activity, alcohol group as acceptor; nucleoside binding; protein kinase activity; nucleotide binding; ribonucleoside binding; kinase activity; ribonucleotide binding; purine ribonucleoside binding; anion binding; purine ribonucleotide binding; adenyl ribonucleotide binding; adenyl nucleotide binding; purine nucleoside binding; transfer…	K14758	HRR25; casein kinase I homolog HRR25 [EC:2.7.11.1]	ko03008 Ribosome biogenesis in eukaryotes;	IPR000719; IPR011009;	Protein kinase domain; Protein kinase-like domain;
TERG_01028	BZIP transcription factor (Fcr3), putative	nucleus	biological regulation;	regulation of biological process;	regulation of cellular process; regulation of gene expression; regulation of transcription, DNA-templated; regulation of cellular biosynthetic process; regulation of primary metabolic process; regulation of macromolecule metabolic process; regulation of nucleobase-containing compound metabolic process; regulation of macromolecule biosynthetic process; regulation of cellular metabolic process; reg…				binding; nucleic acid binding transcription factor activity;	organic cyclic compound binding; heterocyclic compound binding; transcription factor activity, sequence-specific DNA binding;	DNA binding; nucleic acid binding; sequence-specific DNA binding;				IPR004827; IPR023167;	Basic-leucine zipper domain; Yap1 redox domain;
TERG_01029	Phosducin family protein	nucleus													IPR024253; IPR012336;	"Phosducin, thioredoxin-like domain; Thioredoxin-like fold; "
TERG_01030	Coatomer subunit gamma	mitochondria	localization;	macromolecule localization; establishment of localization; cellular localization;	establishment of protein localization; transport; intracellular transport; cellular macromolecule localization; establishment of localization in cell; vesicle-mediated transport; intracellular protein transport; organic substance transport; protein localization; cellular protein localization; protein transport;	membrane; macromolecular complex; cell; organelle;	organelle part; membrane part; cell part; whole membrane; membrane-bounded organelle; coated membrane; protein complex;	cytoplasmic vesicle; organelle membrane; membrane protein complex; COPI-coated vesicle; vesicle; Golgi-associated vesicle membrane; cytoplasm; cytoplasmic vesicle part; intracellular part; vesicle coat; COPI-coated vesicle membrane; coated vesicle membrane; COPI vesicle coat; intracellular; Golgi apparatus part; intracellular organelle; intracellular vesicle; bounding membrane of organelle; intra…	structural molecule activity; binding;			K17267			IPR013040; IPR011989; IPR002553; IPR016024; IPR032154; IPR015873; IPR009028; IPR013041;	"Coatomer, gamma subunit, appendage, Ig-like subdomain; Armadillo-like helical; Clathrin/coatomer adaptor, adaptin-like, N-terminal; Armadillo-type fold; Coatomer subunit gamma, C-terminal; Clathrin alpha-adaptin/coatomer adaptor, appendage, C-terminal subdomain; Coatomer/calthrin adaptor appendage, C-terminal subdomain; Coatomer/clathrin adaptor appendage, Ig-like subdomain; "
TERG_01031	hypothetical protein
TERG_01032	TIGR01456 family HAD hydrolase	mitochondria													IPR023214;	HAD-like domain;
TERG_01034	hypothetical protein
TERG_01037	Uncharacterized mitochondrial outer membrane protein YPR098C	mitochondria													IPR025423;	Domain of unknown function DUF4149;
TERG_01038	hypothetical protein
TERG_01039	hypothetical protein
TERG_01041	Mitochondrial inner membrane AAA protease Yta12, putative	cytoplasm	metabolic process;	primary metabolic process; organic substance metabolic process;	proteolysis; macromolecule metabolic process; protein metabolic process;	membrane;	membrane part;	intrinsic component of membrane; integral component of membrane;	catalytic activity; binding;	ion binding; hydrolase activity; organic cyclic compound binding; heterocyclic compound binding; carbohydrate derivative binding; small molecule binding;	metalloendopeptidase activity; peptidase activity; ATP binding; nucleoside phosphate binding; nucleoside binding; metallopeptidase activity; nucleotide binding; zinc ion binding; endopeptidase activity; ribonucleoside binding; transition metal ion binding; ribonucleotide binding; purine ribonucleoside binding; cation binding; metal ion binding; peptidase activity, acting on L-amino acid peptides;…	K08956			IPR003959; IPR003593; IPR011546; IPR000642; IPR027417;	"ATPase, AAA-type, core; AAA+ ATPase domain; peptidase M41, FtsH extracellular; peptidase M41; P-loop containing nucleoside triphosphate hydrolase; "
TERG_01042	Fungal specific transcription factor domain protein	mitochondria
TERG_01045	threonine-tRNA ligase	cytoplasm	single-organism process; metabolic process; cellular process;	biosynthetic process; cellular metabolic process; organic substance metabolic process; single-organism cellular process; nitrogen compound metabolic process; primary metabolic process; single-organism metabolic process;	peptide metabolic process; cellular aromatic compound metabolic process; cellular protein metabolic process; organonitrogen compound biosynthetic process; tRNA aminoacylation; threonyl-tRNA aminoacylation; cellular amino acid metabolic process; heterocycle metabolic process; nucleobase-containing compound metabolic process; cellular nitrogen compound metabolic process; tRNA aminoacylation for pro…	cell;	cell part;	intracellular part; intracellular; cytoplasm;	catalytic activity; binding;	ion binding; ligase activity; organic cyclic compound binding; heterocyclic compound binding; carbohydrate derivative binding; small molecule binding;	ligase activity, forming aminoacyl-tRNA and related compounds; ATP binding; threonine-tRNA ligase activity; nucleoside phosphate binding; ligase activity, forming carbon-oxygen bonds; nucleoside binding; nucleotide binding; ribonucleoside binding; ribonucleotide binding; purine ribonucleoside binding; purine ribonucleotide binding; anion binding; adenyl ribonucleotide binding; adenyl nucleotide b…	K01868	TARS; threonyl-tRNA synthetase [EC:6.1.1.3]	ko00970 Aminoacyl-tRNA biosynthesis;	IPR033728; IPR018163; IPR012947; IPR002314; IPR004154; IPR012675; IPR006195;	"Threonine-tRNA ligase catalytic core domain; Threonyl/alanyl tRNA synthetase, class II-like, putative editing domain; Threonyl/alanyl tRNA synthetase, SAD; Aminoacyl-tRNA synthetase, class II (G/ P/ S/T); Anticodon-binding; Beta-grasp domain; Aminoacyl-tRNA synthetase, class II; "
TERG_01046	snoRNP protein (Gar1), putative	nucleus	Ribosome biogenesis; rRNA processing	cellular component biogenesis; nitrogen compound metabolic process; primary metabolic process; cellular metabolic process; organic substance metabolic process;	ribonucleoprotein complex biogenesis; cellular aromatic compound metabolic process; pseudouridine synthesis; ribosome biogenesis; organic cyclic compound metabolic process; RNA modification; RNA metabolic process; heterocycle metabolic process; nucleic acid metabolic process; nucleobase-containing compound metabolic process; cellular macromolecule metabolic process; cellular nitrogen compound met…	nucleus	organelle part; non-membrane-bounded organelle; catalytic complex; cell part; ribonucleoprotein complex; membrane-bounded organelle;	intracellular organelle; intracellular non-membrane-bounded organelle; intracellular organelle part; box H/ACA snoRNP complex; nuclear lumen; nucleolar part; intracellular part; nucleolus; intracellular membrane-bounded organelle; nucleus; intracellular organelle lumen; small nucleolar ribonucleoprotein complex; intracellular; box H/ACA RNP complex; intracellular ribonucleoprotein complex; organe…	Ribonucleoprotein, RNA-binding			K11128	GAR1; H/ACA ribonucleoprotein complex subunit 1	ko03008 Ribosome biogenesis in eukaryotes;	IPR009000;	"Translation protein, beta-barrel domain; "
TERG_01048	WSC domain protein, putative	extracellular										K11244	WSC; cell wall integrity and stress response component	ko04139 Regulation of mitophagy - yeast; ko04011 MAPK signaling pathway - yeast;	IPR002889;	Carbohydrate-binding WSC;
TERG_01049	hypothetical protein	nucleus
TERG_01050	Metal homeostatis protein bsd2	nucleus	localization;	establishment of localization;	transport; cation transport; metal ion transport; ion transport; vacuolar transport;
TERG_01051	hypothetical protein	nucleus
TERG_01052	Succinyl-CoA:3-ketoacid-coenzyme A transferase	mitochondria	single-organism process; metabolic process; cellular process;	single-organism cellular process; cellular metabolic process; organic substance metabolic process; single-organism metabolic process; catabolic process;	single-organism catabolic process; ketone body catabolic process; small molecule metabolic process; small molecule catabolic process; cellular ketone body metabolic process; organic substance catabolic process; ketone body metabolic process; cellular catabolic process;				catalytic activity;	transferase activity;	CoA-transferase activity; transferase activity, transferring sulfur-containing groups;	K01027	OXCT; 3-oxoacid CoA-transferase [EC:2.8.3.5]	ko00072 Synthesis and degradation of ketone bodies; ko03460 Fanconi anemia pathway; ko00650 Butanoate metabolism;	IPR012792; IPR012791;	"3-oxoacid CoA-transferase, subunit A; 3-oxoacid CoA-transferase, subunit B; "
TERG_01053	hypothetical protein
TERG_01055	NADH-ubiquinone oxidoreductase 213 kDa subunit	mitochondria
TERG_01056	PH domain protein	nucleus													IPR011993; IPR001849;	PH domain-like; Pleckstrin homology domain;
TERG_01059	hypothetical protein
TERG_01063	rpsU-divergently transcribed protein	mitochondria	single-organism process; metabolic process; cellular process;	single-organism cellular process; biosynthetic process; cellular metabolic process; organic substance metabolic process; single-organism metabolic process;	cofactor biosynthetic process; ketone biosynthetic process; quinone biosynthetic process; ubiquinone biosynthetic process; oxidoreduction coenzyme metabolic process; single-organism biosynthetic process; quinone metabolic process; small molecule metabolic process; coenzyme metabolic process; organic substance biosynthetic process; cellular biosynthetic process; cofactor metabolic process; cellula…							K18587			IPR013718;	COQ9;
TERG_01064	hypothetical protein
TERG_01066	DNA methyltransferase Dim-2	nucleus				nucleus			methyltransferase activity; chromatin binding
TERG_01067	GTPase activating protein (BUD2/CLA2), putative	nucleus	single-organism process; signaling; response to stimulus; cellular process; biological regulation;	single organism signaling; cellular response to stimulus; regulation of biological process; cell communication; regulation of molecular function;	regulation of cellular process; signal transduction; regulation of hydrolase activity; regulation of catalytic activity; regulation of GTPase activity;				binding;	protein binding;					IPR001936; IPR008936; IPR000008;	Ras GTPase-activating protein; Rho GTPase activation protein; C2 domain;
TERG_01068	Autophagy-related protein 9	plasma membrane										K17907
TERG_01069	alpha-1,2-Mannosidase	Golgi apparatus				membrane;			catalytic activity; binding;	ion binding; hydrolase activity;	mannosidase activity; mannosyl-oligosaccharide mannosidase activity; hydrolase activity, acting on glycosyl bonds; alpha-mannosidase activity; cation binding; metal ion binding; hydrolase activity, hydrolyzing O-glycosyl compounds; calcium ion binding; mannosyl-oligosaccharide 1,2-alpha-mannosidase activity;	K01230	"MAN1; mannosyl-oligosaccharide alpha-1,2-mannosidase [EC:3.2.1.113]"""	ko04141 Protein processing in endoplasmic reticulum; ko00513 Various types of N-glycan biosynthesis; ko01100 Metabolic pathways; ko00510 N-Glycan biosynthesis;
TERG_01073	DNA repair protein rhp54
TERG_01075	C2H2 finger domain protein, putative	nucleus							binding;	organic cyclic compound binding; heterocyclic compound binding; ion binding;	transition metal ion binding; nucleic acid binding; cation binding; metal ion binding; zinc ion binding;	K14821			IPR003604; IPR007087; IPR022755;	"Zinc finger, U1-type; Zinc finger, C2H2; Zinc finger, double-stranded RNA binding; "
TERG_01076	aconitate hydratase, mitochondrial	cytoplasm	single-organism process; metabolic process; cellular process;	single-organism cellular process; primary metabolic process; cellular metabolic process; organic substance metabolic process; single-organism metabolic process;	tricarboxylic acid metabolic process; oxidation-reduction process; small molecule metabolic process; tricarboxylic acid cycle; cellular respiration; citrate metabolic process; generation of precursor metabolites and energy; aerobic respiration; energy derivation by oxidation of organic compounds; carboxylic acid metabolic process; organic acid metabolic process; oxoacid metabolic process;				catalytic activity; binding;	lyase activity; metal cluster binding;	iron-sulfur cluster binding; aconitate hydratase activity; hydro-lyase activity; 4 iron, 4 sulfur cluster binding; carbon-oxygen lyase activity;	K01681	ACO; aconitate hydratase [EC:4.2.1.3]	ko00720 Carbon fixation pathways in prokaryotes; ko01130 Biosynthesis of antibiotics; ko01110 Biosynthesis of secondary metabolites; ko01230 Biosynthesis of amino acids; ko01100 Metabolic pathways; ko01210 2-Oxocarboxylic acid metabolism; ko00020 Citrate cycle (TCA cycle); ko01120 Microbial metabolism in diverse environments; ko01200 Carbon metabolism; ko00630 Glyoxylate and dicarboxylate metabol…	IPR001030; IPR000573; IPR015928; IPR015932; IPR015931;	"Aconitase/3-isopropylmalate dehydratase large subunit, alpha/beta/alpha domain; Aconitase A/isopropylmalate dehydratase small subunit, swivel domain; Aconitase/3-isopropylmalate dehydratase, swivel; Aconitase/3-isopropylmalate dehydratase large subunit, alpha/beta/alpha, subdomain 2; Aconitase/3-isopropylmalate dehydratase large subunit, alpha/beta/alpha, subdomain 1/3; "
TERG_01077	hypothetical protein
TERG_01078	alpha,alpha-trehalose-phosphate synthase [UDP-forming]	cyto_nucl	single-organism process; metabolic process; cellular process;	single-organism cellular process; biosynthetic process; primary metabolic process; cellular metabolic process; organic substance metabolic process; single-organism metabolic process;	carbohydrate biosynthetic process; single-organism biosynthetic process; disaccharide metabolic process; carbohydrate metabolic process; oligosaccharide biosynthetic process; organic substance biosynthetic process; cellular biosynthetic process; single-organism carbohydrate metabolic process; trehalose biosynthetic process; cellular carbohydrate metabolic process; disaccharide biosynthetic proces…				catalytic activity;	transferase activity;	transferase activity, transferring hexosyl groups; UDP-glucosyltransferase activity; UDP-glycosyltransferase activity; glucosyltransferase activity; transferase activity, transferring glycosyl groups; alpha,alpha-trehalose-phosphate synthase (UDP-forming) activity;	K00697	otsA; trehalose 6-phosphate synthase [EC:2.4.1.15]	ko00500 Starch and sucrose metabolism; ko01100 Metabolic pathways;	IPR012766; IPR001830;	"Alpha,alpha-trehalose-phosphate synthase; Glycosyl transferase, family 20; "
TERG_01079	hypothetical protein
TERG_01080	di-trans,poly-cis-decaprenylcistransferase
TERG_01081	hypothetical protein
TERG_01085	hypothetical protein
TERG_01086	CAMK/CAMKL/CHK1 protein kinase	cytoplasm	metabolic process; cellular process;	primary metabolic process; cellular metabolic process; organic substance metabolic process;	phosphorylation; cellular protein metabolic process; phosphate-containing compound metabolic process; protein phosphorylation; phosphorus metabolic process; cellular macromolecule metabolic process; cellular protein modification process; protein metabolic process; macromolecule metabolic process; protein modification process; macromolecule modification;				catalytic activity; binding;	ion binding; organic cyclic compound binding; heterocyclic compound binding; carbohydrate derivative binding; transferase activity; small molecule binding;	ATP binding; nucleoside phosphate binding; phosphotransferase activity, alcohol group as acceptor; nucleoside binding; protein kinase activity; nucleotide binding; ribonucleoside binding; kinase activity; ribonucleotide binding; purine ribonucleoside binding; anion binding; purine ribonucleotide binding; adenyl ribonucleotide binding; adenyl nucleotide binding; purine nucleoside binding; transfer…	K02216	CHK1; serine/threonine-protein kinase Chk1 [EC:2.7.11.1]	ko04115 p53 signaling pathway; ko04110 Cell cycle; ko04113 Meiosis - yeast; ko05203 Viral carcinogenesis; ko05166 HTLV-I infection; ko04111 Cell cycle - yeast;	IPR000719; IPR011009;	Protein kinase domain; Protein kinase-like domain;
TERG_01088	3,4-dihydroxy-2-butanone-4-phosphate synthase	cytoskeleton	single-organism process; metabolic process; cellular process;	single-organism cellular process; nitrogen compound metabolic process; biosynthetic process; cellular metabolic process; organic substance metabolic process; single-organism metabolic process;	vitamin biosynthetic process; heterocycle biosynthetic process; single-organism biosynthetic process; riboflavin biosynthetic process; small molecule metabolic process; organic cyclic compound metabolic process; flavin-containing compound biosynthetic process; organonitrogen compound biosynthetic process; organic substance biosynthetic process; cellular biosynthetic process; vitamin metabolic pro…				catalytic activity;	lyase activity;	3,4-dihydroxy-2-butanone-4-phosphate synthase activity; carbon-carbon lyase activity;	K02858	"ribB; 3,4-dihydroxy 2-butanone 4-phosphate synthase [EC:4.1.99.12]"""	ko01110 Biosynthesis of secondary metabolites; ko01100 Metabolic pathways; ko00740 Riboflavin metabolism;	IPR017945;	DHBP synthase RibB-like alpha/beta domain;
TERG_01089	Transcription initiation factor IIE subunit beta	mitochondria	metabolic process; cellular process;	biosynthetic process; cellular metabolic process; organic substance metabolic process; nitrogen compound metabolic process; primary metabolic process;	cellular aromatic compound metabolic process; nucleic acid-templated transcription; DNA-templated transcription, initiation; heterocycle metabolic process; aromatic compound biosynthetic process; nucleobase-containing compound metabolic process; cellular nitrogen compound metabolic process; macromolecule metabolic process; macromolecule biosynthetic process; transcription initiation from RNA poly…	macromolecular complex; cell; organelle; membrane-enclosed lumen;	organelle part; catalytic complex; cell part; membrane-bounded organelle; protein complex;	intracellular organelle; DNA-directed RNA polymerase complex; nuclear DNA-directed RNA polymerase complex; transferase complex, transferring phosphorus-containing groups; transcription factor TFIIE complex; intracellular organelle part; RNA polymerase complex; nuclear lumen; intracellular part; transferase complex; transcription factor complex; nuclear transcription factor complex; DNA-directed R…				K03137	TFIIE2; transcription initiation factor TFIIE subunit beta	ko05169 Epstein-Barr virus infection; ko03022 Basal transcription factors; ko05203 Viral carcinogenesis;	IPR003166;	"Transcription factor TFIIE beta subunit, DNA-binding domain; "
TERG_01091	magnesium-dependent phosphatase-1	mitochondria							catalytic activity;	hydrolase activity;	phosphoric ester hydrolase activity; phosphatase activity; hydrolase activity, acting on ester bonds;	K17619			IPR010033; IPR011004; IPR023214;	"HAD-superfamily phosphatase, subfamily IIIC; Trimeric LpxA-like; HAD-like domain; "
TERG_01092	hypothetical protein
TERG_01095	hypothetical protein
TERG_01100	Clathrin adaptor complex small subunit, putative	mitochondria	localization;	macromolecule localization; establishment of localization;	establishment of protein localization; transport; organic substance transport; protein localization; protein transport;				transporter activity;	substrate-specific transporter activity;	protein transporter activity;	K12399	AP3S; AP-3 complex subunit sigma	ko04142 Lysosome;	IPR022775; IPR011012;	"AP complex, mu/sigma subunit; Longin-like domain; "
TERG_01101	hypothetical protein
TERG_01102	60S ribosomal protein L8-B	cytoplasm	cellular component organization or biogenesis;	cellular component biogenesis;	ribosome biogenesis; ribonucleoprotein complex biogenesis;	macromolecular complex; cell;	cell part; ribonucleoprotein complex;	intracellular; intracellular part; intracellular ribonucleoprotein complex;				K02936	RP-L7Ae; large subunit ribosomal protein L7Ae	ko03010 Ribosome;	IPR029064; IPR004038;	50S ribosomal protein L30e-like; Ribosomal protein L7Ae/L30e/S12e/Gadd45;
TERG_01104	hypothetical protein	nucleus
TERG_01105	hypothetical protein
TERG_01106	EH domain binding protein epsin 2	extracellular										K12471	EPN; epsin	ko04144 Endocytosis;	IPR008942;	ENTH/VHS;
TERG_01107	Anthranilate synthase component I, putative	cytoplasm	metabolic process;	biosynthetic process;								K01657	trpE; anthranilate synthase component I [EC:4.1.3.27]	ko01130 Biosynthesis of antibiotics; ko01110 Biosynthesis of secondary metabolites; ko01230 Biosynthesis of amino acids; ko01100 Metabolic pathways; ko04623 Cytosolic DNA-sensing pathway;	IPR015890; IPR005801;	"Chorismate-utilising enzyme, C-terminal; ADC synthase; "
TERG_01108	hypothetical protein	nucleus
TERG_01109	WD repeat protein	cytoplasm	metabolic process;	primary metabolic process; organic substance metabolic process;	proteolysis; macromolecule metabolic process; protein metabolic process;				binding;	protein binding;					IPR017986; IPR015943; IPR002469; IPR006594;	"WD40-repeat-containing domain; WD40/YVTN repeat-like-containing domain; Dipeptidylpeptidase IV, N-terminal domain; LIS1 homology motif; "
TERG_01110	hypothetical protein
TERG_01111	50S ribosomal protein Mrp49	ribosome	ribosomal large subunit assembly; translation			ribosome			structural constituent of ribosome; rRNA binding			K17440			IPR007741; IPR012336;	Ribosomal protein/NADH dehydrogenase domain; Thioredoxin-like fold;
TERG_01115	Translation initiation factor eif-2b epsilon subunit, putative	nucleus	metabolic process;	biosynthetic process;					catalytic activity; binding;	protein binding; transferase activity;	nucleotidyltransferase activity; transferase activity, transferring phosphorus-containing groups;	K03240	EIF2B5; translation initiation factor eIF-2B subunit epsilon	ko03013 RNA transport;	IPR011004; IPR003307; IPR016024; IPR005835; IPR029044; IPR016021;	Trimeric LpxA-like; W2 domain; Armadillo-type fold; Nucleotidyl transferase domain; Nucleotide-diphospho-sugar transferases; MIF4G-like domain;
TERG_01116	hypothetical protein
TERG_01117	Stress response transcription factor SrrA/Skn7, putative	extracellular	single-organism process; signaling; response to stimulus; cellular process; biological regulation;	single organism signaling; cellular response to stimulus; regulation of biological process; cell communication;	regulation of cellular process; signal transduction; intracellular signal transduction; phosphorelay signal transduction system;							K15859	"SKN7; osomolarity two-component system, response regulator SKN7"""	ko02020 Two-component system;	IPR011006; IPR001789;	"CheY-like superfamily; Signal transduction response regulator, receiver domain; "
TERG_01118	AhpC/TSA family protein	mitochondria	single-organism process; cellular process; biological regulation;	regulation of biological quality; regulation of biological process; single-organism cellular process;	regulation of cellular process; homeostatic process; cell redox homeostasis; cellular homeostasis;				catalytic activity;	oxidoreductase activity;		K11187	"PRDX5; peroxiredoxin 5, atypical 2-Cys peroxiredoxin [EC:1.11.1.15]"""	ko04146 Peroxisome;	IPR013766; IPR013740; IPR012336;	Thioredoxin domain; Redoxin; Thioredoxin-like fold;
TERG_01120	NGG1 interacting factor Nif3, putative	cytoplasm
TERG_01121	Golgi transport complex subunit Cog6, putative	mitochondria	localization;	establishment of localization;	transport; Golgi vesicle transport; intra-Golgi vesicle-mediated transport; vesicle-mediated transport;	macromolecular complex; cell; organelle;	organelle part; cell part; membrane-bounded organelle; protein complex; tethering complex;	intracellular organelle; cytoplasm; intracellular organelle part; endomembrane system; intracellular part; intracellular membrane-bounded organelle; intracellular; Golgi apparatus part; Golgi transport complex; Golgi apparatus; cytoplasmic part;
TERG_01123	hypothetical protein
TERG_01124	hypothetical protein	cytoskeleton													IPR016123;	"Mog1/PsbP, alpha/beta/alpha sandwich; "
TERG_01125	SprT family metallopeptidase, putative	cytoplasm	metabolic process; proteolysis			cytoplasm			metallopeptidase activity; zinc ion binding
TERG_01126	1,3-beta-glucanosyltransferase	extracellular	metabolic process;	primary metabolic process; organic substance metabolic process;	carbohydrate metabolic process;										IPR012946; IPR017853; IPR013781;	"X8 domain; Glycoside hydrolase superfamily; Glycoside hydrolase, catalytic domain; "
TERG_01127	1,3-beta-glucan synthase component FKS1	plasma membrane	single-organism process; metabolic process; cellular process;	single-organism cellular process; biosynthetic process; primary metabolic process; cellular metabolic process; organic substance metabolic process; single-organism metabolic process;	carbohydrate biosynthetic process; (1->3)-beta-D-glucan metabolic process; single-organism biosynthetic process; cellular glucan metabolic process; polysaccharide biosynthetic process; glucan metabolic process; cellular polysaccharide biosynthetic process; (1->3)-beta-D-glucan biosynthetic process; carbohydrate metabolic process; organic substance biosynthetic process; cellular biosynthetic proce…	membrane; macromolecular complex; cell;	catalytic complex; membrane part; cell part;	plasma membrane part; cell periphery; transferase complex; 1,3-beta-D-glucan synthase complex; plasma membrane;	catalytic activity;	transferase activity;	transferase activity, transferring hexosyl groups; UDP-glucosyltransferase activity; UDP-glycosyltransferase activity; glucosyltransferase activity; transferase activity, transferring glycosyl groups; 1,3-beta-D-glucan synthase activity;	K00706	"E2.4.1.34; 1,3-beta-glucan synthase [EC:2.4.1.34]"""	ko00500 Starch and sucrose metabolism; ko04011 MAPK signaling pathway - yeast;	IPR026899;	"1,3-beta-glucan synthase subunit FKS1-like, domain-1; "
TERG_01128	Serine palmitoyl CoA transferase subunit LcbA	cytoplasm	metabolic process;	biosynthetic process;					catalytic activity; binding;	organic cyclic compound binding; heterocyclic compound binding; ion binding; cofactor binding;	anion binding; pyridoxal phosphate binding;	K00654	SPT; serine palmitoyltransferase [EC:2.3.1.50]	ko00600 Sphingolipid metabolism; ko01100 Metabolic pathways; ko04071 Sphingolipid signaling pathway;	IPR004839; IPR015424; IPR015421;	"Aminotransferase, class I/classII; Pyridoxal phosphate-dependent transferase; Pyridoxal phosphate-dependent transferase, major region, subdomain 1; "
TERG_01129	cell wall glucanase (Scw4)	cell wall, Secreted	cellular glucan metabolic process; fungal-type cell wall organization;glucan catabolic process			cell wall, Secreted			glucan exo-1,3-beta-glucosidase activity
TERG_01131	iron-sulfur clusters transporter atm1, mitochondrial	cyto_mito	localization;	establishment of localization;	transport; transmembrane transport;	membrane;	membrane part;	intrinsic component of membrane; integral component of membrane;	catalytic activity; binding; transporter activity;	hydrolase activity; organic cyclic compound binding; heterocyclic compound binding; ion binding; carbohydrate derivative binding; transmembrane transporter activity; small molecule binding;	nucleoside phosphate binding; primary active transmembrane transporter activity; hydrolase activity, acting on acid anhydrides; ATPase activity; pyrophosphatase activity; ribonucleotide binding; ATPase activity, coupled to movement of substances; purine ribonucleoside binding; hydrolase activity, acting on acid anhydrides, catalyzing transmembrane movement of substances; anion binding; adenyl rib…	K05663	ABC.ATM; mitochondrial ABC transporter ATM	ko02010 ABC transporters;	IPR003593; IPR003439; IPR027417; IPR011527;	"AAA+ ATPase domain; ABC transporter-like; P-loop containing nucleoside triphosphate hydrolase; ABC transporter type 1, transmembrane domain; "
TERG_01132	Mitochondrial protein Fmp26, putative	mitochondria													IPR016031;	Tryptophan RNA-binding attenuator protein-like domain;
TERG_01134	hypothetical protein
TERG_01135	hypothetical protein	mitochondria
TERG_01136	hypothetical protein
TERG_01137	hypothetical protein
TERG_01139	hypothetical protein
TERG_01141	CMGC/MAPK protein kinase	nucleus	metabolic process; cellular process;	primary metabolic process; cellular metabolic process; organic substance metabolic process;	phosphorylation; cellular protein metabolic process; phosphate-containing compound metabolic process; protein phosphorylation; phosphorus metabolic process; cellular macromolecule metabolic process; cellular protein modification process; protein metabolic process; macromolecule metabolic process; protein modification process; macromolecule modification;				signal transducer activity; catalytic activity; binding;	ion binding; organic cyclic compound binding; heterocyclic compound binding; signal transducer activity, downstream of receptor; carbohydrate derivative binding; transferase activity; small molecule binding;	ATP binding; nucleoside phosphate binding; phosphotransferase activity, alcohol group as acceptor; nucleoside binding; protein kinase activity; nucleotide binding; signal transducer, downstream of receptor, with serine/threonine kinase activity; MAP kinase activity; ribonucleoside binding; kinase activity; ribonucleotide binding; purine ribonucleoside binding; protein serine/threonine kinase acti…	K04371	MAPK1_3; mitogen-activated protein kinase 1/3 [EC:2.7.11.24]	ko04726 Serotonergic synapse; ko04912 GnRH signaling pathway; ko04722 Neurotrophin signaling pathway; ko04650 Natural killer cell mediated cytotoxicity; ko04810 Regulation of actin cytoskeleton; ko05219 Bladder cancer; ko04320 Dorso-ventral axis formation; ko04666 Fc gamma R-mediated phagocytosis; ko04151 PI3K-Akt signaling pathway; ko05145 Toxoplasmosis; ko04724 Glutamatergic synapse; ko04620 To…	IPR000719; IPR011009;	Protein kinase domain; Protein kinase-like domain;
TERG_01144	hypothetical protein
TERG_01145	hypothetical protein
TERG_01146	hypothetical protein
TERG_01149	GMC oxidoreductase, putative	cytoplasm	single-organism process; metabolic process;	single-organism metabolic process;	oxidation-reduction process;				catalytic activity; binding;	organic cyclic compound binding; heterocyclic compound binding; ion binding; cofactor binding; small molecule binding; oxidoreductase activity;	oxidoreductase activity, acting on CH-OH group of donors; nucleoside phosphate binding; flavin adenine dinucleotide binding; anion binding; nucleotide binding; coenzyme binding;				IPR000172; IPR007867; IPR023753;	"Glucose-methanol-choline oxidoreductase, N-terminal; Glucose-methanol-choline oxidoreductase, C-terminal; FAD/NAD(P)-binding domain; "
TERG_01150	hypothetical protein
TERG_01151	Proteasome regulatory particle subunit (RpnI), putative	cyto_nucl							binding;	protein binding;		K03039	PSMD13; 26S proteasome regulatory subunit N9	ko05169 Epstein-Barr virus infection; ko03050 Proteasome;	IPR011991; IPR000717;	Winged helix-turn-helix DNA-binding domain; Proteasome component (PCI) domain;
TERG_01155	hypothetical protein
TERG_01158	hypothetical protein
TERG_01159	hypothetical protein
TERG_01160	hypothetical protein
TERG_01164	Beta-alanine synthase, putative	mitochondria	metabolic process;						catalytic activity;	hydrolase activity;	hydrolase activity, acting on carbon-nitrogen (but not peptide) bonds; hydrolase activity, acting on carbon-nitrogen (but not peptide) bonds, in linear amidines;				IPR011650;	"peptidase M20, dimerisation domain; "
TERG_01165	40S ribosomal protein S10b	mitochondria										K02947	RP-S10e; small subunit ribosomal protein S10e	ko03010 Ribosome;	IPR005326;	"Plectin/S10, N-terminal; "
TERG_01166	hypothetical protein
TERG_01168	AAA family ATPase, putative	nucleus							binding;	ion binding; organic cyclic compound binding; heterocyclic compound binding; carbohydrate derivative binding; small molecule binding;	ATP binding; nucleoside phosphate binding; nucleoside binding; nucleotide binding; ribonucleoside binding; ribonucleotide binding; purine ribonucleoside binding; anion binding; purine ribonucleotide binding; adenyl ribonucleotide binding; adenyl nucleotide binding; purine nucleoside binding; purine nucleotide binding; purine ribonucleoside triphosphate binding;				IPR003959; IPR003593; IPR015415; IPR027417;	"ATPase, AAA-type, core; AAA+ ATPase domain; Vps4 oligomerisation, C-terminal; P-loop containing nucleoside triphosphate hydrolase; "
TERG_01170	CECR1 family adenosine deaminase, putative	cytoplasm							catalytic activity;	deaminase activity;		K19572	CECR1; adenosine deaminase CECR1 [EC:3.5.4.4]	ko00230 Purine metabolism; ko01100 Metabolic pathways;	IPR001365; IPR032466;	Adenosine/AMP deaminase domain; Metal-dependent hydrolase;
TERG_01172	hypothetical protein
TERG_01173	hypothetical protein
TERG_01174	hypothetical protein
TERG_01175	hypothetical protein
TERG_01177	hypothetical protein
TERG_01180	hypothetical protein
TERG_01181	hypothetical protein
TERG_01183	RanBP1 domain protein	nucleus	localization;	establishment of localization; cellular localization;	transport; intracellular transport; establishment of localization in cell;										IPR000156; IPR011993;	Ran binding domain; PH domain-like;
TERG_01184	hypothetical protein
TERG_01185	hypothetical protein
TERG_01188	26S proteasome non-ATPase regulatory subunit 9, putative	cytoplasm							binding;	protein binding;		K06693			IPR001478;	PDZ domain;
TERG_01191	hypothetical protein
TERG_01192	hypothetical protein
TERG_01195	hypothetical protein
TERG_01197	Nitrilase	mitochondria	metabolic process;	nitrogen compound metabolic process;					catalytic activity;	hydrolase activity;	hydrolase activity, acting on carbon-nitrogen (but not peptide) bonds;	K01501	E3.5.5.1; nitrilase [EC:3.5.5.1]	ko00643 Styrene degradation; ko00380 Tryptophan metabolism; ko00910 Nitrogen metabolism; ko01120 Microbial metabolism in diverse environments; ko00460 Cyanoamino acid metabolism; ko00627 Aminobenzoate degradation;	IPR003010;	Carbon-nitrogen hydrolase;
TERG_01198	pre-mRNA-splicing factor rse1	cyto_nucl				organelle; cell;	cell part; membrane-bounded organelle;	intracellular membrane-bounded organelle; intracellular organelle; nucleus; intracellular; intracellular part;	binding;	organic cyclic compound binding; heterocyclic compound binding; protein binding;	nucleic acid binding;	K12830	SF3B3; splicing factor 3B subunit 3	ko03040 Spliceosome;	IPR017986; IPR015943; IPR011044; IPR004871;	"WD40-repeat-containing domain; WD40/YVTN repeat-like-containing domain; Quinoprotein amine dehydrogenase, beta chain-like; Cleavage/polyadenylation specificity factor, A subunit, C-terminal; "
TERG_01199	Ubiquitin-like protein DskB, putative	nucleus							binding;	protein binding;		K04523	UBQLN; ubiquilin	ko04141 Protein processing in endoplasmic reticulum;	IPR006636; IPR015940; IPR029071; IPR000626; IPR009060;	Heat shock chaperonin-binding; Ubiquitin-associated domain; Ubiquitin-related domain; Ubiquitin domain; UBA-like;
TERG_01200	hypothetical protein
TERG_01201	hypothetical protein
TERG_01202	histone H3-like centromeric protein cnp1	nucleus				macromolecular complex; cell; organelle;	organelle part; non-membrane-bounded organelle; cell part; DNA packaging complex; protein-DNA complex;	intracellular organelle; intracellular non-membrane-bounded organelle; intracellular organelle part; intracellular part; chromosomal part; nucleosome; chromatin; intracellular; chromosome;	binding;	organic cyclic compound binding; heterocyclic compound binding; protein binding;	DNA binding; protein heterodimerization activity; protein dimerization activity; nucleic acid binding;	K11495			IPR009072; IPR007125;	Histone-fold; Histone H2A/H2B/H3;
TERG_01205	hypothetical protein
TERG_01206	DEAH-box RNA helicase (Dhr1), putative	nucleus							catalytic activity; binding;	hydrolase activity; organic cyclic compound binding; heterocyclic compound binding; ion binding; carbohydrate derivative binding; small molecule binding;	nucleoside phosphate binding; ATP-dependent helicase activity; hydrolase activity, acting on acid anhydrides; ATPase activity; pyrophosphatase activity; ribonucleotide binding; purine ribonucleoside binding; anion binding; adenyl ribonucleotide binding; adenyl nucleotide binding; hydrolase activity, acting on acid anhydrides, in phosphorus-containing anhydrides; purine nucleotide binding; purine …	K14780			IPR007502; IPR011545; IPR011709; IPR014001; IPR027417; IPR001650;	"Helicase-associated domain; DEAD/DEAH box helicase domain; Domain of unknown function DUF1605; Helicase superfamily 1/2, ATP-binding domain; P-loop containing nucleoside triphosphate hydrolase; Helicase, C-terminal; "
TERG_01207	RNA binding protein, putative	nucleus													IPR013170;	mRNA splicing factor Cwf21 domain;
TERG_01208	Phosphoethanolamine N-methyltransferase, putative	plasma membrane	metabolic process;						catalytic activity;			K05288	"PIGO; phosphatidylinositol glycan, class O"""	ko00563 Glycosylphosphatidylinositol(GPI)-anchor biosynthesis; ko01100 Metabolic pathways;	IPR017849; IPR017850;	"Alkaline phosphatase-like, alpha/beta/alpha; Alkaline-phosphatase-like, core domain; "
TERG_01209	hypothetical protein
TERG_01210	hypothetical protein
TERG_01212	mRNA binding protein Pumilio 2, putative	nucleus							binding;	organic cyclic compound binding; heterocyclic compound binding;	RNA binding; nucleic acid binding;	K17944			IPR011989; IPR016024; IPR033712; IPR033133;	"Armadillo-like helical; Armadillo-type fold; Pumilio, RNA binding domain; Pumilio homology domain; "
TERG_01215	Chromosome segregation protein Cse1, putative	cytoplasm	localization;	macromolecule localization; establishment of localization; cellular localization;	establishment of protein localization; transport; intracellular transport; cellular macromolecule localization; establishment of localization in cell; intracellular protein transport; organic substance transport; protein localization; cellular protein localization; protein transport;				binding;	protein binding;	small GTPase binding; Ras GTPase binding; Ran GTPase binding; GTPase binding; enzyme binding;	K18423			IPR001494; IPR005043; IPR011989; IPR016024; IPR013713;	"Importin-beta, N-terminal domain; CAS/CSE, C-terminal; Armadillo-like helical; Armadillo-type fold; Exportin/Importin, Cse1-like; "
TERG_01216	Peptidyl-tRNA hydrolase domain protein	mitochondria	single-organism process; metabolic process; cellular process; cellular component organization or biogenesis;	cellular component organization; biosynthetic process; cellular metabolic process; organic substance metabolic process; single-organism cellular process; nitrogen compound metabolic process; primary metabolic process;	peptide metabolic process; cellular protein metabolic process; organonitrogen compound biosynthetic process; protein complex disassembly; cellular protein complex disassembly; cellular nitrogen compound metabolic process; protein metabolic process; macromolecule metabolic process; macromolecule biosynthetic process; translation; protein complex subunit organization; peptide biosynthetic process; …				binding;	organic cyclic compound binding; heterocyclic compound binding;	translation termination factor activity; RNA binding; translation factor activity, RNA binding; nucleic acid binding; translation release factor activity;				IPR014720; IPR000352;	Double-stranded RNA-binding domain; Peptide chain release factor class I/class II;
TERG_01217	hypothetical protein
TERG_01218	hypothetical protein
TERG_01223	hypothetical protein
TERG_01229	Phospholipid-transporting ATPase	plasma membrane	single-organism process; localization;	establishment of localization; single-organism localization; macromolecule localization;	lipid transport; organic substance transport; lipid localization; phospholipid transport; anion transport; transport; organophosphate ester transport; organic anion transport; ion transport; single-organism transport;	membrane;	membrane part;	intrinsic component of membrane; integral component of membrane;	catalytic activity; binding; transporter activity;	substrate-specific transporter activity; hydrolase activity; organic cyclic compound binding; heterocyclic compound binding; ion binding; carbohydrate derivative binding; small molecule binding;	nucleoside phosphate binding; lipid transporter activity; hydrolase activity, acting on acid anhydrides; ATPase activity; pyrophosphatase activity; ribonucleotide binding; ATPase activity, coupled to movement of substances; purine ribonucleoside binding; cation binding; anion binding; adenyl ribonucleotide binding; adenyl nucleotide binding; hydrolase activity, acting on acid anhydrides, in phosp…	K01530			IPR032630; IPR023299; IPR023214;	"P-type ATPase, C-terminal; P-type ATPase, cytoplasmic domain N; HAD-like domain; "
TERG_01230	MFS sugar transporter, putative	mitochondria													IPR028095;	"Mso1, N-terminal domain; "
TERG_01232	hypothetical protein
TERG_01233	Peroxisomal D3,D2-enoyl-CoA isomerase	cytoplasm	metabolic process;						catalytic activity;			K13239	"PECI; peroxisomal 3,2-trans-enoyl-CoA isomerase [EC:5.3.3.8]"""	ko04146 Peroxisome; ko00071 Fatty acid degradation;	IPR029045;	ClpP/crotonase-like domain;
TERG_01235	hypothetical protein	nucleus
TERG_01237	HEAT repeat protein	cytoplasm							binding;						IPR011989; IPR016024;	Armadillo-like helical; Armadillo-type fold;
TERG_01239	Mis6 domain protein	nucleus	cellular process; cellular component organization or biogenesis;	cellular component biogenesis; cellular component organization;	protein-DNA complex assembly; cellular macromolecular complex assembly; chromosome organization; cellular component assembly; organelle organization; macromolecular complex assembly; centromere complex assembly; macromolecular complex subunit organization; protein-DNA complex subunit organization;	macromolecular complex; cell; organelle;	organelle part; non-membrane-bounded organelle; cell part; protein complex;	intracellular organelle; intracellular non-membrane-bounded organelle; intracellular organelle part; intracellular part; chromosomal part; chromosomal region; intracellular; chromosome; chromosome, centromeric region; kinetochore;				K11501
TERG_01240	hypothetical protein	extracellular
TERG_01241	CLPTM1 domain protein	plasma membrane				membrane;	membrane part;	intrinsic component of membrane; integral component of membrane;
TERG_01242	Short chain dehydrogenase/reductase family protein	cytoplasm													IPR016040;	NAD(P)-binding domain;
TERG_01243	hypothetical protein
TERG_01244	Protein transport protein sec22	cyto_nucl	localization;	establishment of localization;	transport; vesicle-mediated transport;	membrane;	membrane part;	intrinsic component of membrane; integral component of membrane;				K08517	SEC22; vesicle transport protein SEC22	ko04145 Phagosome; ko05134 Legionellosis; ko04130 SNARE interactions in vesicular transport;	IPR010908; IPR011012; IPR001388;	Longin domain; Longin-like domain; Synaptobrevin;
TERG_01245	Killer toxin sensitivity protein (Iki1), putative	mitochondria				macromolecular complex; cell;	cell part; protein complex;	intracellular; intracellular part; Elongator holoenzyme complex;				K11376
TERG_01247	FAD dependent oxidoreductase, putative	cytoplasm	single-organism process; metabolic process;	single-organism metabolic process;	oxidation-reduction process;				catalytic activity;	oxidoreductase activity;					IPR006076; IPR023753;	FAD dependent oxidoreductase; FAD/NAD(P)-binding domain;
TERG_01248	Mannosyl-oligosaccharide glucosidase, putative	extracellular							catalytic activity;			K01228	GCS1; mannosyl-oligosaccharide glucosidase [EC:3.2.1.106]	ko04141 Protein processing in endoplasmic reticulum; ko01100 Metabolic pathways; ko00510 N-Glycan biosynthesis;	IPR031335; IPR031631; IPR012341; IPR008928;	"Glycosyl hydrolase family 63, C-terminal; Glycosyl hydrolase family 63, N-terminal; Six-hairpin glycosidase; Six-hairpin glycosidase-like; "
TERG_01249	hypothetical protein	nucleus													IPR019315;	Kinase phosphorylation domain;
TERG_01250	hypothetical protein	nucleus
TERG_01252	catalase A	cytoplasm	metabolic process; single-organism process; response to stimulus;	response to stress; single-organism metabolic process;	oxidation-reduction process; response to oxidative stress;				catalytic activity; binding; antioxidant activity;	organic cyclic compound binding; heterocyclic compound binding; oxidoreductase activity;	heme binding; catalase activity; peroxidase activity; tetrapyrrole binding; oxidoreductase activity, acting on peroxide as acceptor;	K03781	katE; catalase [EC:1.11.1.6]	ko04211 Longevity regulating pathway; ko04212 Longevity regulating pathway - worm; ko01130 Biosynthesis of antibiotics; ko01110 Biosynthesis of secondary metabolites; ko05014 Amyotrophic lateral sclerosis (ALS); ko00380 Tryptophan metabolism; ko04068 FoxO signaling pathway; ko04146 Peroxisome; ko01200 Carbon metabolism; ko04011 MAPK signaling pathway - yeast; ko04213 Longevity regulating pathway …	IPR020835; IPR011614; IPR010582; IPR029062;	Catalase-like domain; Catalase core domain; Catalase immune-responsive domain; Class I glutamine amidotransferase-like;
TERG_01253	ER to Golgi transport protein Yif1	plasma membrane
TERG_01256	Ribosomal protein L14	nucleus	metabolic process; cellular process;	nitrogen compound metabolic process; biosynthetic process; primary metabolic process; cellular metabolic process; organic substance metabolic process;	peptide metabolic process; peptide biosynthetic process; cellular protein metabolic process; cellular amide metabolic process; organonitrogen compound biosynthetic process; organic substance biosynthetic process; cellular biosynthetic process; cellular nitrogen compound biosynthetic process; cellular macromolecule biosynthetic process; cellular macromolecule metabolic process; cellular nitrogen c…	organelle; macromolecular complex; cell;	cell part; ribonucleoprotein complex; non-membrane-bounded organelle;	ribosome; intracellular organelle; intracellular non-membrane-bounded organelle; intracellular; cytoplasm; intracellular part; intracellular ribonucleoprotein complex; cytoplasmic part;	structural molecule activity;	structural constituent of ribosome;		K02875	RP-L14e; large subunit ribosomal protein L14e	ko03010 Ribosome;	IPR008991; IPR002784; IPR014722; IPR005824;	Translation protein SH3-like domain; Ribosomal protein L14e domain; Ribosomal protein L2 domain 2; KOW;
TERG_01259	hypothetical protein
TERG_01262	hypothetical protein
TERG_01266	amidophosphoribosyltransferase	cytoplasm	single-organism process; metabolic process; cellular process;	single-organism cellular process; nitrogen compound metabolic process; primary metabolic process; cellular metabolic process; organic substance metabolic process; single-organism metabolic process;	nucleoside metabolic process; cellular aromatic compound metabolic process; small molecule metabolic process; organic cyclic compound metabolic process; heterocycle metabolic process; nucleobase-containing compound metabolic process; carbohydrate derivative metabolic process; cellular nitrogen compound metabolic process; glycosyl compound metabolic process; nucleobase-containing small molecule me…							K00764	purF; amidophosphoribosyltransferase [EC:2.4.2.14]	ko00230 Purine metabolism; ko01130 Biosynthesis of antibiotics; ko01110 Biosynthesis of secondary metabolites; ko01100 Metabolic pathways; ko00620 Pyruvate metabolism;	IPR000836; IPR029057;	Phosphoribosyltransferase domain; Phosphoribosyltransferase-like;
TERG_01267	Amidophosphoribosyltransferase	extracellular										K00764	purF; amidophosphoribosyltransferase [EC:2.4.2.14]	ko00230 Purine metabolism; ko01130 Biosynthesis of antibiotics; ko01110 Biosynthesis of secondary metabolites; ko01100 Metabolic pathways; ko00620 Pyruvate metabolism;	IPR029055; IPR017932;	"Nucleophile aminohydrolases, N-terminal; Glutamine amidotransferase type 2 domain; "
TERG_01268	hypothetical protein
TERG_01270	hypothetical protein
TERG_01271	isocitrate lyase	mitochondria	metabolic process; single-organism process; cellular process;	single-organism metabolic process; single-organism cellular process; cellular metabolic process; organic substance metabolic process;	small molecule metabolic process; carboxylic acid metabolic process; organic acid metabolic process; oxoacid metabolic process;				catalytic activity;	lyase activity;	oxo-acid-lyase activity; isocitrate lyase activity; carbon-carbon lyase activity;	K01637	E4.1.3.1; isocitrate lyase [EC:4.1.3.1]	ko01120 Microbial metabolism in diverse environments; ko01200 Carbon metabolism; ko01110 Biosynthesis of secondary metabolites; ko01100 Metabolic pathways; ko00630 Glyoxylate and dicarboxylate metabolism;	IPR015813;	Pyruvate/Phosphoenolpyruvate kinase-like domain;
TERG_01272	2-methylcitrate synthase, mitochondrial	cytoplasm	single-organism process; metabolic process; cellular process;	single-organism cellular process; primary metabolic process; cellular metabolic process; organic substance metabolic process; single-organism metabolic process;	tricarboxylic acid metabolic process; oxidation-reduction process; small molecule metabolic process; tricarboxylic acid cycle; cellular respiration; citrate metabolic process; generation of precursor metabolites and energy; aerobic respiration; energy derivation by oxidation of organic compounds; carboxylic acid metabolic process; organic acid metabolic process; oxoacid metabolic process;				catalytic activity;	transferase activity;	transferase activity, transferring acyl groups; transferase activity, transferring acyl groups, acyl groups converted into alkyl on transfer;	K01647	CS; citrate synthase [EC:2.3.3.1]	ko01130 Biosynthesis of antibiotics; ko01110 Biosynthesis of secondary metabolites; ko01230 Biosynthesis of amino acids; ko01100 Metabolic pathways; ko01210 2-Oxocarboxylic acid metabolism; ko00020 Citrate cycle (TCA cycle); ko01120 Microbial metabolism in diverse environments; ko01200 Carbon metabolism; ko00630 Glyoxylate and dicarboxylate metabolism;	IPR016142;	"Citrate synthase-like, large alpha subdomain; "
TERG_01275	Glutathione S-transferase, putative	mitochondria							binding;	protein binding;					IPR010987; IPR012336; IPR004045;	"Glutathione S-transferase, C-terminal-like; Thioredoxin-like fold; Glutathione S-transferase, N-terminal; "
TERG_01277	hypothetical protein	cytoplasm													IPR023796;	Serpin domain;
TERG_01279	hypothetical protein
TERG_01280	IgE-binding protein	extracellular
TERG_01282	hypothetical protein
TERG_01284	Methyltransferase, putative	nucleus													IPR011989; IPR029063;	Armadillo-like helical; S-adenosyl-L-methionine-dependent methyltransferase;
TERG_01285	hypothetical protein
TERG_01289	Vesicle membrane receptor protein (V-SNARE), synaptobrevin/VAMP family member, putative	plasma membrane	localization;	establishment of localization;	transport; vesicle-mediated transport;	membrane;	membrane part;	intrinsic component of membrane; integral component of membrane;				K08513	VAMP4; vesicle-associated membrane protein 4	ko04130 SNARE interactions in vesicular transport;	IPR001388;	Synaptobrevin;
TERG_01291	hypothetical protein
TERG_01292	Glycosyl hydrolase family 76 protein	extracellular	metabolic process;	primary metabolic process; catabolic process; organic substance metabolic process;	organic substance catabolic process; carbohydrate metabolic process; carbohydrate catabolic process;				catalytic activity;	hydrolase activity;	mannan endo-1,6-alpha-mannosidase activity; hydrolase activity, hydrolyzing O-glycosyl compounds; mannosidase activity; hydrolase activity, acting on glycosyl bonds; alpha-mannosidase activity;	K08257			IPR012341; IPR008928;	Six-hairpin glycosidase; Six-hairpin glycosidase-like;
TERG_01295	hypothetical protein
TERG_01299	DUF1613 domain protein	nucleus							catalytic activity;	transferase activity;	transferase activity, transferring one-carbon groups; methyltransferase activity;	K15447
TERG_01300	Structural maintenance of chromosomes 5 smc5	nucleus													IPR027417; IPR003395;	"P-loop containing nucleoside triphosphate hydrolase; RecF/RecN/SMC, N-terminal; "
TERG_01301	hypothetical protein
TERG_01303	hypothetical protein
TERG_01305	2-dehydropantoate 2-reductase, putative	mitochondria	single-organism process; metabolic process;	single-organism metabolic process;	oxidation-reduction process;				catalytic activity; binding;	organic cyclic compound binding; heterocyclic compound binding; cofactor binding; oxidoreductase activity; small molecule binding;	oxidoreductase activity, acting on CH-OH group of donors; oxidoreductase activity, acting on the CH-OH group of donors, NAD or NADP as acceptor; 2-dehydropantoate 2-reductase activity; nucleoside phosphate binding; NADP binding; nucleotide binding; coenzyme binding;				IPR013332; IPR008927; IPR013752; IPR013328; IPR016040;	"Ketopantoate reductase, N-terminal domain; 6-phosphogluconate dehydrogenase C-terminal domain-like; Ketopantoate reductase, C-terminal domain; 6-phosphogluconate dehydrogenase, domain 2; NAD(P)-binding domain; "
TERG_01309	hypothetical protein
TERG_01311	Short-chain dehydrogenase/reductase family protein, putative	mitochondria													IPR016040;	NAD(P)-binding domain;
TERG_01313	hypothetical protein
TERG_01316	hypothetical protein
TERG_01317	hypothetical protein
TERG_01318	hypothetical protein
TERG_01319	hypothetical protein
TERG_01321	Ankyrin repeat and BTB/POZ domain protein	nucleus							binding;	protein binding;					IPR011333; IPR020683; IPR000210;	SKP1/BTB/POZ domain; Ankyrin repeat-containing domain; BTB/POZ domain;
TERG_01322	hypothetical protein
TERG_01325	hypothetical protein
TERG_01326	hypothetical protein	nucleus
TERG_01327	hypothetical protein
TERG_01328	hypothetical protein
TERG_01329	Ctr copper transporter, putative	plasma membrane	localization;	establishment of localization;	transport; transition metal ion transport; transmembrane transport; cation transmembrane transport; ion transmembrane transport; cation transport; inorganic ion transmembrane transport; ion transport; metal ion transport; copper ion transport; copper ion transmembrane transport; inorganic cation transmembrane transport;	membrane;	membrane part;	intrinsic component of membrane; integral component of membrane;	transporter activity;	substrate-specific transporter activity; transmembrane transporter activity;	metal ion transmembrane transporter activity; ion transmembrane transporter activity; copper ion transmembrane transporter activity; transition metal ion transmembrane transporter activity; inorganic cation transmembrane transporter activity; cation transmembrane transporter activity; substrate-specific transmembrane transporter activity;
TERG_01330	GPI anchored protein, putative	cell wall, membrane, Secreted	cell-substrate adhesion;cellular iron ion homeostasis			cell wall, membrane, Secreted			binding;heme binding
TERG_01331	Phospholipase, putative	mitochondria							catalytic activity;	hydrolase activity;					IPR029058; IPR003140;	Alpha/Beta hydrolase fold; Phospholipase/carboxylesterase/thioesterase;
TERG_01333	AGC/NDR/NDR-UNCLASSIFIED protein kinase	nucleus	metabolic process; cellular process;	primary metabolic process; cellular metabolic process; organic substance metabolic process;	phosphorylation; cellular protein metabolic process; phosphate-containing compound metabolic process; protein phosphorylation; phosphorus metabolic process; cellular macromolecule metabolic process; cellular protein modification process; protein metabolic process; macromolecule metabolic process; protein modification process; macromolecule modification;				catalytic activity; binding;	ion binding; organic cyclic compound binding; heterocyclic compound binding; carbohydrate derivative binding; transferase activity; small molecule binding;	ATP binding; nucleoside phosphate binding; phosphotransferase activity, alcohol group as acceptor; nucleoside binding; protein kinase activity; nucleotide binding; ribonucleoside binding; kinase activity; ribonucleotide binding; purine ribonucleoside binding; protein serine/threonine kinase activity; anion binding; purine ribonucleotide binding; adenyl ribonucleotide binding; adenyl nucleotide bi…				IPR000719; IPR011009; IPR000961;	"Protein kinase domain; Protein kinase-like domain; AGC-kinase, C-terminal; "
TERG_01334	C6 finger domain protein, putative	nucleus	biological regulation;	regulation of biological process;	regulation of cellular process; regulation of gene expression; regulation of transcription, DNA-templated; regulation of cellular biosynthetic process; regulation of primary metabolic process; regulation of macromolecule metabolic process; regulation of nucleobase-containing compound metabolic process; regulation of macromolecule biosynthetic process; regulation of cellular metabolic process; reg…	organelle; cell;	cell part; membrane-bounded organelle;	intracellular membrane-bounded organelle; intracellular organelle; nucleus; intracellular; intracellular part;	binding; nucleic acid binding transcription factor activity;	ion binding; transcription factor activity, sequence-specific DNA binding;	RNA polymerase II transcription factor activity, sequence-specific DNA binding; transition metal ion binding; metal ion binding; cation binding; zinc ion binding;				IPR001138;	Zn(2)-C6 fungal-type DNA-binding domain;
TERG_01336	hypothetical protein
TERG_01338	Hydantoinase/oxoprolinase, putative	cytosol	metabolic process;glutathione metabolic process			cytosol			catalytic activity; hydrolase activity;	hydrolase activity;					IPR027479; IPR008040; IPR024071;	"Protein of unknown function DUF917, N-terminal; Hydantoinaseoxoprolinase, N-terminal; Protein of unknown function DUF917, C-terminal; "
TERG_01339	glutamate decarboxylase	cytoplasm	single-organism process; metabolic process; cellular process;	single-organism cellular process; nitrogen compound metabolic process; primary metabolic process; cellular metabolic process; organic substance metabolic process; single-organism metabolic process;	glutamine family amino acid metabolic process; dicarboxylic acid metabolic process; small molecule metabolic process; alpha-amino acid metabolic process; cellular amino acid metabolic process; carboxylic acid metabolic process; glutamate metabolic process; organic acid metabolic process; oxoacid metabolic process; organonitrogen compound metabolic process;				catalytic activity; binding;	organic cyclic compound binding; heterocyclic compound binding; ion binding; lyase activity; cofactor binding;	glutamate decarboxylase activity; carbon-carbon lyase activity; carboxy-lyase activity; anion binding; pyridoxal phosphate binding;	K01580	E4.1.1.15; glutamate decarboxylase [EC:4.1.1.15]	ko04727 GABAergic synapse; ko01110 Biosynthesis of secondary metabolites; ko00430 Taurine and hypotaurine metabolism; ko01100 Metabolic pathways; ko00410 beta-Alanine metabolism; ko00620 Pyruvate metabolism; ko00650 Butanoate metabolism; ko04940 Type I diabetes mellitus;	IPR015424; IPR015421;	"Pyridoxal phosphate-dependent transferase; Pyridoxal phosphate-dependent transferase, major region, subdomain 1; "
TERG_01340	hypothetical protein
TERG_01347	TIGR01456 family HAD hydrolase	mitochondria													IPR023214;	HAD-like domain;
TERG_01348	hypothetical protein
TERG_01352	hypothetical protein
TERG_01353	hypothetical protein	mitochondria
TERG_01354	V-type proton ATPase proteolipid subunit
TERG_01355	hypothetical protein
TERG_01358	spermidine synthase	mitochondria	metabolic process; cellular process;	nitrogen compound metabolic process; cellular metabolic process; organic substance metabolic process;	polyamine metabolic process; cellular amine metabolic process; cellular nitrogen compound metabolic process; amine metabolic process; cellular biogenic amine metabolic process; organonitrogen compound metabolic process;				catalytic activity;			K00797	speE; spermidine synthase [EC:2.5.1.16]	ko00270 Cysteine and methionine metabolism; ko00330 Arginine and proline metabolism; ko00480 Glutathione metabolism; ko01100 Metabolic pathways; ko00410 beta-Alanine metabolism;	IPR029063; IPR030374;	S-adenosyl-L-methionine-dependent methyltransferase; Polyamine biosynthesis domain;
TERG_01359	transketolase
TERG_01360	C6 transcription factor FacB	nucleus	metabolic process; cellular process; biological regulation;	biosynthetic process; cellular metabolic process; organic substance metabolic process; nitrogen compound metabolic process; primary metabolic process; regulation of biological process;	regulation of cellular process; cellular aromatic compound metabolic process; nucleic acid-templated transcription; regulation of macromolecule metabolic process; regulation of nucleobase-containing compound metabolic process; regulation of RNA biosynthetic process; heterocycle metabolic process; nucleobase-containing compound metabolic process; aromatic compound biosynthetic process; regulation …	organelle; cell;	cell part; membrane-bounded organelle;	intracellular membrane-bounded organelle; intracellular organelle; nucleus; intracellular; intracellular part;	binding; nucleic acid binding transcription factor activity;	organic cyclic compound binding; heterocyclic compound binding; ion binding; transcription factor activity, sequence-specific DNA binding;	DNA binding; RNA polymerase II transcription factor activity, sequence-specific DNA binding; transition metal ion binding; nucleic acid binding; cation binding; metal ion binding; zinc ion binding;				IPR001138; IPR007219;	"Zn(2)-C6 fungal-type DNA-binding domain; Transcription factor domain, fungi; "
TERG_01363	SET domain protein	cytoplasm
TERG_01364	hypothetical protein	mitochondria
TERG_01366	hypothetical protein
TERG_01367	50S ribosomal protein L25	ribosome	ribosomal large subunit assembly; translation			ribosome			structural constituent of ribosome; rRNA binding
TERG_01368	Small nuclear ribonucleoprotein complex protein Nhp2, putative	nucleus	Ribosome biogenesis; rRNA processing	cellular component biogenesis;	ribosome biogenesis; ribonucleoprotein complex biogenesis;	nucleus	organelle part; non-membrane-bounded organelle; cell part; ribonucleoprotein complex; membrane-bounded organelle;	intracellular organelle; intracellular non-membrane-bounded organelle; intracellular organelle part; nuclear lumen; intracellular part; nucleolus; intracellular membrane-bounded organelle; nucleus; intracellular organelle lumen; intracellular; intracellular ribonucleoprotein complex; organelle lumen; nuclear part;	Ribonucleoprotein; RNA binding; nucleic acid binding;	organic cyclic compound binding; heterocyclic compound binding;	RNA binding; nucleic acid binding;	K11129	NHP2; H/ACA ribonucleoprotein complex subunit 2	ko03008 Ribosome biogenesis in eukaryotes;	IPR029064; IPR004038;	50S ribosomal protein L30e-like; Ribosomal protein L7Ae/L30e/S12e/Gadd45;
TERG_01371	Zinc finger, C2H2-type matrin	nucleus	Transcription; Transcription regulation			nucleus			RNA binding; transition metal ion binding; nucleic acid binding
TERG_01373	PAF acetylhydrolase family protein	cytoplasm	metabolic process; lipid metabolic process	single-organism metabolic process; primary metabolic process; catabolic process; organic substance metabolic process;	lipid catabolic process; organic substance catabolic process; single-organism catabolic process; lipid metabolic process;	cytoplasm			catalytic activity; binding; hydrolase activity; 1-alkyl-2-acetylglycerophosphocholine esterase activity	hydrolase activity;	1-alkyl-2-acetylglycerophosphocholine esterase activity; carboxylic ester hydrolase activity; hydrolase activity, acting on ester bonds;				IPR029058;	Alpha/Beta hydrolase fold;
TERG_01379	Serine/threonine-protein phosphatase 2A activator	nucleus							molecular function regulator;	enzyme regulator activity;	phosphatase activator activity; enzyme activator activity; phosphatase regulator activity;	K17605	PPP2R4; serine/threonine-protein phosphatase 2A activator	ko04931 Insulin resistance;
TERG_01380	hypothetical protein	nucleus										K13120
TERG_01381	hypothetical protein
TERG_01382	hypothetical protein
TERG_01393	hypothetical protein
TERG_01394	hypothetical protein
TERG_01396	hypothetical protein
TERG_01397	hypothetical protein
TERG_01398	hypothetical protein
TERG_01400	Nonsense-mediated mRNA decay protein Upf3, putative	nucleus							binding;	organic cyclic compound binding; heterocyclic compound binding; small molecule binding;	nucleoside phosphate binding; nucleic acid binding; nucleotide binding;	K14328	UPF3; regulator of nonsense transcripts 3	ko03015 mRNA surveillance pathway; ko03013 RNA transport;	IPR000504; IPR012677; IPR005120;	"RNA recognition motif domain; Nucleotide-binding alpha-beta plait domain; Regulator of nonsense-mediated decay, UPF3; "
TERG_01401	Ctr copper transporter family protein	plasma membrane	localization;	establishment of localization;	transport; transition metal ion transport; transmembrane transport; cation transmembrane transport; ion transmembrane transport; cation transport; inorganic ion transmembrane transport; ion transport; metal ion transport; copper ion transport; copper ion transmembrane transport; inorganic cation transmembrane transport;	membrane;	membrane part;	intrinsic component of membrane; integral component of membrane;	transporter activity;	substrate-specific transporter activity; transmembrane transporter activity;	metal ion transmembrane transporter activity; ion transmembrane transporter activity; copper ion transmembrane transporter activity; transition metal ion transmembrane transporter activity; inorganic cation transmembrane transporter activity; cation transmembrane transporter activity; substrate-specific transmembrane transporter activity;	K14686	"SLC31A1; solute carrier family 31 (copper transporter), member 1"""	ko04978 Mineral absorption;
TERG_01403	serine/threonine-protein phosphatase	cytoplasm							catalytic activity;	hydrolase activity;		K15427			IPR029052; IPR004843; IPR006186;	"Metallo-dependent phosphatase-like; Calcineurin-like phosphoesterase domain, ApaH type; Serine/threonine-specific protein phosphatase/bis(5-nucleosyl)-tetraphosphatase; "
TERG_01406	hypothetical protein
TERG_01407	DNA repair protein	nucleus	response to stimulus; metabolic process; cellular process;	cellular response to stimulus; response to stress; nitrogen compound metabolic process; primary metabolic process; cellular metabolic process; organic substance metabolic process;	cellular response to stress; cellular aromatic compound metabolic process; DNA metabolic process; double-strand break repair; organic cyclic compound metabolic process; cellular response to DNA damage stimulus; DNA repair; heterocycle metabolic process; nucleic acid metabolic process; nucleobase-containing compound metabolic process; cellular macromolecule metabolic process; cellular nitrogen com…	organelle; macromolecular complex; cell;	cell part; protein complex; membrane-bounded organelle; organelle part;	intracellular membrane-bounded organelle; intracellular organelle; nucleus; intracellular; intracellular organelle part; intracellular part; Mre11 complex; nuclear part;	catalytic activity; binding;	ion binding; hydrolase activity;	transition metal ion binding; hydrolase activity, acting on ester bonds; nuclease activity; cation binding; exonuclease activity; 3'-5' exonuclease activity; metal ion binding; endonuclease activity; manganese ion binding;	K10865	MRE11; double-strand break repair protein MRE11	ko03440 Homologous recombination; ko03450 Non-homologous end-joining;	IPR029052; IPR004843; IPR007281;	"Metallo-dependent phosphatase-like; Calcineurin-like phosphoesterase domain, ApaH type; Mre11, DNA-binding; "
TERG_01409	hypothetical protein
TERG_01410	SNF7 family protein	nucleus	localization;	establishment of localization;	transport; vacuolar transport;							K12193	VPS24; charged multivesicular body protein 3	ko04144 Endocytosis;
TERG_01411	Hsp90 binding co-chaperone (Sba1), putative	cyto_nucl													IPR008978;	HSP20-like chaperone;
TERG_01412	CCCH finger DNA binding protein, putative	nucleus							binding;	ion binding;	metal ion binding; cation binding;				IPR000571; IPR032378;	"Zinc finger, CCCH-type; ZC3H15/TMA46 family, C-terminal; "
TERG_01415	ribosomal protein L24	mitochondria	metabolic process; cellular process;	nitrogen compound metabolic process; biosynthetic process; primary metabolic process; cellular metabolic process; organic substance metabolic process;	peptide metabolic process; peptide biosynthetic process; cellular protein metabolic process; cellular amide metabolic process; organonitrogen compound biosynthetic process; organic substance biosynthetic process; cellular biosynthetic process; cellular nitrogen compound biosynthetic process; cellular macromolecule biosynthetic process; cellular macromolecule metabolic process; cellular nitrogen c…	macromolecular complex; cell; organelle;	organelle part; non-membrane-bounded organelle; cell part; ribonucleoprotein complex;	ribosome; intracellular organelle; intracellular non-membrane-bounded organelle; intracellular organelle part; cytoplasm; intracellular part; large ribosomal subunit; ribosomal subunit; intracellular; intracellular ribonucleoprotein complex; cytoplasmic part;	structural molecule activity;	structural constituent of ribosome;		K02898	RP-L26e; large subunit ribosomal protein L26e	ko03010 Ribosome;	IPR008991; IPR014722; IPR005824;	Translation protein SH3-like domain; Ribosomal protein L2 domain 2; KOW;
TERG_01417	hypothetical protein
TERG_01422	Mitochondrial import receptor subunit (Tom20), putative	mitochondria	localization;	establishment of localization; cellular localization; macromolecule localization;	intracellular transport; organic substance transport; protein transport; transport; establishment of protein localization; protein targeting; cellular macromolecule localization; establishment of localization in cell; intracellular protein transport; cellular protein localization; protein localization;	membrane; macromolecular complex; cell; organelle;	outer membrane; organelle part; membrane part; cell part; whole membrane; membrane-bounded organelle; protein complex;	organelle membrane; membrane protein complex; cytoplasm; mitochondrial protein complex; intracellular part; mitochondrial membrane part; mitochondrial envelope; intracellular; organelle outer membrane; mitochondrial outer membrane translocase complex; outer mitochondrial membrane protein complex; intracellular organelle; mitochondrial part; bounding membrane of organelle; mitochondrial outer memb…				K17770			IPR023392;	"Mitochondrial outer membrane translocase complex, subunit Tom20 domain; "
TERG_01429	hypothetical protein
TERG_01430	hypothetical protein
TERG_01433	hypothetical protein
TERG_01435	hypothetical protein
TERG_01441	hypothetical protein
TERG_01442	hypothetical protein
TERG_01443	ABC multidrug transporter, putative	plasma membrane	localization;	establishment of localization;	transport; transmembrane transport;	membrane;	membrane part;	intrinsic component of membrane; integral component of membrane;	catalytic activity; binding; transporter activity;	hydrolase activity; organic cyclic compound binding; heterocyclic compound binding; ion binding; carbohydrate derivative binding; transmembrane transporter activity; small molecule binding;	nucleoside phosphate binding; primary active transmembrane transporter activity; hydrolase activity, acting on acid anhydrides; ATPase activity; pyrophosphatase activity; ribonucleotide binding; ATPase activity, coupled to movement of substances; purine ribonucleoside binding; hydrolase activity, acting on acid anhydrides, catalyzing transmembrane movement of substances; anion binding; adenyl rib…				IPR003593; IPR003439; IPR011527; IPR027417;	"AAA+ ATPase domain; ABC transporter-like; ABC transporter type 1, transmembrane domain; P-loop containing nucleoside triphosphate hydrolase; "
TERG_01444	Nonribosomal peptide synthase Pes1	plasma membrane	metabolic process;						catalytic activity; binding;	modified amino acid binding; ion binding; amide binding; small molecule binding;	phosphopantetheine binding; vitamin binding; anion binding;				IPR020806; IPR001242; IPR009081; IPR000873; IPR010071; IPR023213;	"Polyketide synthase, phosphopantetheine-binding domain; Condensation domain; Phosphopantetheine binding ACP domain; AMP-dependent synthetase/ligase; Amino acid adenylation domain; Chloramphenicol acetyltransferase-like domain; "
TERG_01447	Protein bcp1	nucleus										K15262
TERG_01449	mitochondrial division protein 1	nucleus										K17970
TERG_01451	hypothetical protein
TERG_01452	Kinesin family protein	mitochondria	single-organism process; cellular process;	single-organism cellular process; microtubule-based process;	microtubule-based movement; movement of cell or subcellular component;				catalytic activity; binding;	protein binding; hydrolase activity; organic cyclic compound binding; heterocyclic compound binding; ion binding; carbohydrate derivative binding; small molecule binding;	motor activity; nucleoside phosphate binding; hydrolase activity, acting on acid anhydrides; cytoskeletal protein binding; pyrophosphatase activity; ribonucleotide binding; microtubule binding; purine ribonucleoside binding; anion binding; adenyl ribonucleotide binding; adenyl nucleotide binding; hydrolase activity, acting on acid anhydrides, in phosphorus-containing anhydrides; microtubule motor…	K10395			IPR027417; IPR001752;	P-loop containing nucleoside triphosphate hydrolase; Kinesin motor domain;
TERG_01453	hypothetical protein
TERG_01454	hypothetical protein
TERG_01455	hypothetical protein
TERG_01456	hypothetical protein
TERG_01458	inositol hexaphosphate kinase	nucleus							catalytic activity;	transferase activity;	kinase activity; phosphotransferase activity, alcohol group as acceptor; inositol-1,4,5-trisphosphate 3-kinase activity; inositol trisphosphate kinase activity; transferase activity, transferring phosphorus-containing groups;
TERG_01463	Peroxidase	peroxisome	metabolic process; single-organism process; response to stimulus;	response to stress; single-organism metabolic process;	oxidation-reduction process; response to oxidative stress;				catalytic activity; binding; antioxidant activity;	organic cyclic compound binding; heterocyclic compound binding; oxidoreductase activity;	heme binding; peroxidase activity; tetrapyrrole binding; oxidoreductase activity, acting on peroxide as acceptor;	K00428			IPR002016;	"Haem peroxidase, plant/fungal/bacterial; "
TERG_01464	hypothetical protein
TERG_01465	TPR repeat protein	cytoplasm							binding;	protein binding;					IPR011990;	Tetratricopeptide-like helical domain;
TERG_01470	hypothetical protein
TERG_01472	hypothetical protein	nucleus
TERG_01474	hypothetical protein
TERG_01475	DNA topoisomerase 2	cytoplasm	metabolic process; cellular process; cellular component organization or biogenesis;	cellular component organization; nitrogen compound metabolic process; primary metabolic process; cellular metabolic process; organic substance metabolic process;	cellular aromatic compound metabolic process; DNA metabolic process; organic cyclic compound metabolic process; DNA topological change; chromosome organization; nucleic acid metabolic process; heterocycle metabolic process; nucleobase-containing compound metabolic process; organelle organization; cellular macromolecule metabolic process; cellular nitrogen compound metabolic process; macromolecule…				catalytic activity; binding;	ion binding; hydrolase activity; heterocyclic compound binding; organic cyclic compound binding; carbohydrate derivative binding; isomerase activity; small molecule binding;	DNA binding; ATP binding; nucleoside phosphate binding; nucleoside binding; hydrolase activity, acting on acid anhydrides; nucleotide binding; nucleoside-triphosphatase activity; ATPase activity; ribonucleoside binding; pyrophosphatase activity; DNA topoisomerase II activity; DNA topoisomerase type II (ATP-hydrolyzing) activity; ribonucleotide binding; DNA topoisomerase activity; ATPase activity,…	K03164			IPR002205; IPR013758; IPR031660; IPR034157; IPR013757; IPR013506; IPR003594; IPR013759; IPR020568; IPR006171; IPR014721; IPR024946; IPR013760;	"DNA topoisomerase, type IIA, subunit A/C-terminal; DNA topoisomerase, type IIA, subunit A/ C-terminal, alpha-beta; C-terminal associated domain of TOPRIM; DNA topoisomerase 2, TOPRIM domain; Type IIA DNA topoisomerase subunit A, alpha-helical domain; DNA topoisomerase, type IIA, subunit B, domain 2; Histidine kinase-like ATPase, C-terminal domain; DNA topoisomerase, type IIA, central domain; Rib…
TERG_01477	Reticulon-like protein	plasma membrane													IPR003388;	Reticulon;
TERG_01481	hypothetical protein
TERG_01483	calcium-binding protein NCS-1	nucleus							binding;	ion binding;	cation binding; metal ion binding; calcium ion binding;	K19932			IPR002048; IPR011992;	EF-hand domain; EF-hand domain pair;
TERG_01485	hypothetical protein
TERG_01486	hypothetical protein
TERG_01488	hypothetical protein	nucleus													IPR003615;	HNH nuclease;
TERG_01495	PCI domain protein	nucleus
TERG_01500	Flavin-binding monooxygenase, putative	plasma membrane	single-organism process; metabolic process;	single-organism metabolic process;	oxidation-reduction process;				catalytic activity; binding;	ion binding; cofactor binding; oxidoreductase activity; heterocyclic compound binding; organic cyclic compound binding; small molecule binding;	oxidoreductase activity, acting on paired donors, with incorporation or reduction of molecular oxygen, NAD(P)H as one donor, and incorporation of one atom of oxygen; nucleoside phosphate binding; flavin adenine dinucleotide binding; oxidoreductase activity, acting on paired donors, with incorporation or reduction of molecular oxygen; nucleotide binding; N,N-dimethylaniline monooxygenase activity;…				IPR023753;	FAD/NAD(P)-binding domain;
TERG_01501	hypothetical protein
TERG_01502	U3 small nucleolar ribonucleoprotein protein Lcp5, putative	nucleus	Ribosome biogenesis; rRNA processing			nucleus			Ribonucleoprotein; RNA-binding			K14765
TERG_01503	DUF895 domain membrane protein	plasma membrane	localization;	establishment of localization;	transport; transmembrane transport;	membrane;	membrane part;	intrinsic component of membrane; integral component of membrane;							IPR020846;	Major facilitator superfamily domain;
TERG_01504	hypothetical protein	nucleus
TERG_01505	hypothetical protein
TERG_01506	hypothetical protein
TERG_01507	hypothetical protein	nucleus													IPR008427;	"Extracellular membrane protein, CFEM domain; "
TERG_01508	Ubiquitin conjugating enzyme, putative	cytoplasm										K10575	UBE2G1; ubiquitin-conjugating enzyme E2 G1 [EC:2.3.2.23]	ko04141 Protein processing in endoplasmic reticulum; ko04120 Ubiquitin mediated proteolysis; ko05012 Parkinson's disease;	IPR016135; IPR000608;	Ubiquitin-conjugating enzyme/RWD-like; Ubiquitin-conjugating enzyme E2;
TERG_01509	hypothetical protein	plasma membrane
TERG_01510	hypothetical protein
TERG_01515	hypothetical protein
TERG_01516	ubiquitin-conjugating enzyme E2 2	mitochondria										K10573	UBE2A; ubiquitin-conjugating enzyme E2 A [EC:2.3.2.23]	ko04120 Ubiquitin mediated proteolysis;	IPR016135; IPR000608;	Ubiquitin-conjugating enzyme/RWD-like; Ubiquitin-conjugating enzyme E2;
TERG_01518	hypothetical protein
TERG_01519	hypothetical protein
TERG_01520	hypothetical protein	nucleus
TERG_01521	Acetyl-CoA-acetyltransferase, putative	mitochondria	metabolic process;						catalytic activity;	transferase activity;	transferase activity, transferring acyl groups; transferase activity, transferring acyl groups other than amino-acyl groups;	K00626	E2.3.1.9; acetyl-CoA C-acetyltransferase [EC:2.3.1.9]	ko01130 Biosynthesis of antibiotics; ko03460 Fanconi anemia pathway; ko00900 Terpenoid backbone biosynthesis; ko00380 Tryptophan metabolism; ko01200 Carbon metabolism; ko00620 Pyruvate metabolism; ko00650 Butanoate metabolism; ko00640 Propanoate metabolism; ko00310 Lysine degradation; ko00720 Carbon fixation pathways in prokaryotes; ko00362 Benzoate degradation; ko01110 Biosynthesis of secondary …	IPR016039; IPR020616; IPR020617;	"Thiolase-like; Thiolase, N-terminal; Thiolase, C-terminal; "
TERG_01522	kinesin heavy chain	nucleus	single-organism process; cellular process;	single-organism cellular process; microtubule-based process;	microtubule-based movement; movement of cell or subcellular component;				catalytic activity; binding;	protein binding; hydrolase activity; organic cyclic compound binding; heterocyclic compound binding; ion binding; carbohydrate derivative binding; small molecule binding;	motor activity; nucleoside phosphate binding; hydrolase activity, acting on acid anhydrides; cytoskeletal protein binding; pyrophosphatase activity; ribonucleotide binding; microtubule binding; purine ribonucleoside binding; anion binding; adenyl ribonucleotide binding; adenyl nucleotide binding; hydrolase activity, acting on acid anhydrides, in phosphorus-containing anhydrides; microtubule motor…	K10396	KIF5; kinesin family member 5	ko04728 Dopaminergic synapse; ko04144 Endocytosis;	IPR027417; IPR001752;	P-loop containing nucleoside triphosphate hydrolase; Kinesin motor domain;
TERG_01523	hypothetical protein
TERG_01524	5'-nucleotidase, putative	nucleus	single-organism process; metabolic process; cellular process;	cellular metabolic process; organic substance metabolic process; single-organism cellular process; nitrogen compound metabolic process; primary metabolic process; single-organism metabolic process; catabolic process;	cellular aromatic compound metabolic process; organophosphate catabolic process; nucleotide metabolic process; phosphate-containing compound metabolic process; cellular nitrogen compound catabolic process; nucleoside phosphate catabolic process; heterocycle metabolic process; nucleobase-containing compound metabolic process; nucleoside phosphate metabolic process; organic cyclic compound cataboli…				catalytic activity;	hydrolase activity;					IPR029052; IPR004843; IPR008334;	"Metallo-dependent phosphatase-like; Calcineurin-like phosphoesterase domain, ApaH type; 5'-Nucleotidase, C-terminal; "
TERG_01525	UPF0160 domain protein MYG1, putative	mitochondria
TERG_01526	hypothetical protein
TERG_01527	hypothetical protein
TERG_01531	hypothetical protein
TERG_01532	hypothetical protein
TERG_01533	hypothetical protein
TERG_01537	hypothetical protein	cytoplasm
TERG_01539	hypothetical protein
TERG_01540	hypothetical protein	nucleus													IPR003615;	HNH nuclease;
TERG_01543	hypothetical protein	cytoplasm													IPR029063;	S-adenosyl-L-methionine-dependent methyltransferase;
TERG_01544	Pitrilysin family metalloprotease (Cym1), putative	mitochondria	metabolic process;	primary metabolic process; organic substance metabolic process;	proteolysis; macromolecule metabolic process; protein metabolic process;				catalytic activity; binding;	ion binding;	metal ion binding; cation binding;	K06972			IPR007863; IPR013578; IPR011765; IPR011249; IPR011237;	"peptidase M16, C-terminal; peptidase M16C associated; peptidase M16, N-terminal; Metalloenzyme, LuxS/M16 peptidase-like; peptidase M16 domain; "
TERG_01545	hypothetical protein
TERG_01546	Oxidoreductase, 2-nitropropane dioxygenase family, putative	cytoplasm	single-organism process; metabolic process;	single-organism metabolic process;	oxidation-reduction process;				catalytic activity;	oxidoreductase activity;	oxidoreductase activity, acting on single donors with incorporation of molecular oxygen; oxidoreductase activity, acting on single donors with incorporation of molecular oxygen, incorporation of one atom of oxygen (internal monooxygenases or internal mixed function oxidases); monooxygenase activity; nitronate monooxygenase activity;				IPR013785; IPR004136;	Aldolase-type TIM barrel; Nitronate monooxygenase;
TERG_01547	hypothetical protein
TERG_01551	hypothetical protein
TERG_01553	methionine-tRNA ligase	cyto_nucl	single-organism process; metabolic process; cellular process;	biosynthetic process; cellular metabolic process; organic substance metabolic process; single-organism cellular process; nitrogen compound metabolic process; primary metabolic process; single-organism metabolic process;	peptide metabolic process; cellular aromatic compound metabolic process; cellular protein metabolic process; organonitrogen compound biosynthetic process; tRNA aminoacylation; cellular amino acid metabolic process; heterocycle metabolic process; nucleobase-containing compound metabolic process; cellular nitrogen compound metabolic process; tRNA aminoacylation for protein translation; protein meta…				catalytic activity; binding;	ligase activity; ion binding; organic cyclic compound binding; heterocyclic compound binding; carbohydrate derivative binding; small molecule binding;	ligase activity, forming aminoacyl-tRNA and related compounds; ATP binding; nucleoside phosphate binding; methionine-tRNA ligase activity; ligase activity, forming carbon-oxygen bonds; nucleoside binding; nucleotide binding; ribonucleoside binding; ribonucleotide binding; purine ribonucleoside binding; anion binding; purine ribonucleotide binding; adenyl ribonucleotide binding; adenyl nucleotide …	K01874	MARS; methionyl-tRNA synthetase [EC:6.1.1.10]	ko00970 Aminoacyl-tRNA biosynthesis; ko00450 Selenocompound metabolism;	IPR033911; IPR014729; IPR015413; IPR009080;	"Methioninyl-tRNA synthetase core domain; Rossmann-like alpha/beta/alpha sandwich fold; Methionyl/Leucyl tRNA synthetase; Aminoacyl-tRNA synthetase, class Ia, anticodon-binding; "
TERG_01556	CaaX farnesyltransferase alpha subunit Ram2	cytoplasm	metabolic process; cellular process;	primary metabolic process; cellular metabolic process; organic substance metabolic process;	protein prenylation; cellular macromolecule metabolic process; cellular protein metabolic process; cellular protein modification process; macromolecule metabolic process; protein metabolic process; protein modification process; macromolecule modification; prenylation;				catalytic activity;	transferase activity;	transferase activity, transferring alkyl or aryl (other than methyl) groups; prenyltransferase activity; protein prenyltransferase activity;	K05955	FNTA; protein farnesyltransferase/geranylgeranyltransferase type-1 subunit alpha [EC:2.5.1.58 2.5.1.59]	ko01130 Biosynthesis of antibiotics; ko00900 Terpenoid backbone biosynthesis;
TERG_01558	Cation chloride cotransporter, putative	plasma membrane	localization;	establishment of localization;	transport; transmembrane transport; ion transport;	membrane;			transporter activity;			K14429			IPR004841; IPR018491;	"Amino acid permease/ SLC12A domain; SLC12A transporter, C-terminal; "
TERG_01559	Amino acid transporter, putative	plasma membrane										K14209			IPR013057;	"Amino acid transporter, transmembrane domain; "
TERG_01561	Small nuclear ribonucleoprotein SmB, putative	mitochondria										K11086	SNRPB; small nuclear ribonucleoprotein B and B'	ko03040 Spliceosome; ko05322 Systemic lupus erythematosus;	IPR001163; IPR010920;	"LSM domain, eukaryotic/archaea-type; LSM domain; "
TERG_01563	hypothetical protein	nucleus
TERG_01564	pyruvate carboxylase	cytoplasm	single-organism process; metabolic process; cellular process;	single-organism cellular process; biosynthetic process; primary metabolic process; cellular metabolic process; organic substance metabolic process; single-organism metabolic process;	carbohydrate biosynthetic process; hexose biosynthetic process; single-organism biosynthetic process; small molecule metabolic process; monosaccharide biosynthetic process; carbohydrate metabolic process; organic substance biosynthetic process; glucose metabolic process; single-organism carbohydrate metabolic process; pyruvate metabolic process; gluconeogenesis; monosaccharide metabolic process; …				catalytic activity; binding;	ligase activity; heterocyclic compound binding; organic cyclic compound binding; ion binding; amide binding; sulfur compound binding; carbohydrate derivative binding; small molecule binding;	pyruvate carboxylase activity; nucleoside phosphate binding; ligase activity, forming carbon-carbon bonds; carboxylic acid binding; ribonucleotide binding; purine ribonucleoside binding; cation binding; anion binding; adenyl ribonucleotide binding; adenyl nucleotide binding; purine nucleotide binding; purine ribonucleoside triphosphate binding; DNA binding; ATP binding; vitamin binding; nucleosid…	K01958	PC; pyruvate carboxylase [EC:6.4.1.1]	ko00020 Citrate cycle (TCA cycle); ko00720 Carbon fixation pathways in prokaryotes; ko01120 Microbial metabolism in diverse environments; ko01200 Carbon metabolism; ko01230 Biosynthesis of amino acids; ko01100 Metabolic pathways; ko00620 Pyruvate metabolism;	IPR013785; IPR011053; IPR005479; IPR005481; IPR000891; IPR013815; IPR016185; IPR011764; IPR009057; IPR011761; IPR005482; IPR013816; IPR003379; IPR011054;	"Aldolase-type TIM barrel; Single hybrid motif; Carbamoyl-phosphate synthetase large subunit-like, ATP-binding domain; Biotin carboxylase-like, N-terminal domain; Pyruvate carboxyltransferase; ATP-grasp fold, subdomain 1; Pre-ATP-grasp domain; Biotin carboxylation domain; Homeobox domain-like; ATP-grasp fold; Biotin carboxylase, C-terminal; ATP-grasp fold, subdomain 2; Carboxylase, conserved doma…
TERG_01565	Clathrin heavy chain	cytoplasm	localization;	macromolecule localization; establishment of localization; cellular localization;	establishment of protein localization; transport; intracellular transport; cellular macromolecule localization; establishment of localization in cell; vesicle-mediated transport; intracellular protein transport; organic substance transport; protein localization; cellular protein localization; protein transport;	membrane; macromolecular complex; cell; organelle;	organelle part; cell part; membrane part; whole membrane; membrane-bounded organelle; coated membrane; protein complex;	transport vesicle membrane; clathrin coat of trans-Golgi network vesicle; cytoplasmic vesicle; organelle membrane; membrane protein complex; cell periphery; vesicle; Golgi-associated vesicle membrane; cytoplasm; cytoplasmic vesicle part; intracellular part; vesicle coat; coated vesicle membrane; trans-Golgi network transport vesicle; clathrin-coated vesicle; intracellular; membrane region; Golgi …	structural molecule activity; binding;	protein binding;		K04646	CLTC; clathrin heavy chain	ko05100 Bacterial invasion of epithelial cells; ko04721 Synaptic vesicle cycle; ko05016 Huntington's disease; ko04961 Endocrine and other factor-regulated calcium reabsorption; ko04142 Lysosome; ko04144 Endocytosis;	IPR016025; IPR011990; IPR016024; IPR001473;	"Clathrin, heavy chain, linker/propeller domain; Tetratricopeptide-like helical domain; Armadillo-type fold; Clathrin, heavy chain, propeller, N-terminal; "
TERG_01567	INO80 chromatin remodeling complex (Ies1), putative	nucleus										K11675
TERG_01568	ATP-dependent RNA helicase DED1	nucleus							binding;	ion binding; organic cyclic compound binding; heterocyclic compound binding; carbohydrate derivative binding; small molecule binding;	ATP binding; nucleoside phosphate binding; nucleoside binding; nucleotide binding; ribonucleoside binding; ribonucleotide binding; nucleic acid binding; purine ribonucleoside binding; anion binding; purine ribonucleotide binding; adenyl ribonucleotide binding; adenyl nucleotide binding; purine nucleoside binding; purine nucleotide binding; purine ribonucleoside triphosphate binding;	K11594	DDX3X; ATP-dependent RNA helicase DDX3X [EC:3.6.4.13]	ko05203 Viral carcinogenesis; ko05161 Hepatitis B; ko04622 RIG-I-like receptor signaling pathway;	IPR014014; IPR011545; IPR014001; IPR027417; IPR001650;	"RNA helicase, DEAD-box type, Q motif; DEAD/DEAH box helicase domain; Helicase superfamily 1/2, ATP-binding domain; P-loop containing nucleoside triphosphate hydrolase; Helicase, C-terminal; "
TERG_01569	hypothetical protein	cyto_mito
TERG_01572	hypothetical protein
TERG_01573	peptidyl-prolyl cis-trans isomerase B	endoplasmic reticulum	metabolic process; cellular process;	primary metabolic process; cellular metabolic process; organic substance metabolic process; protein folding;	cellular protein metabolic process; peptidyl-proline modification; protein peptidyl-prolyl isomerization; peptidyl-amino acid modification; cellular macromolecule metabolic process; cellular protein modification process; protein metabolic process; macromolecule metabolic process; macromolecule modification; protein modification process;				catalytic activity;	isomerase activity;	peptidyl-prolyl cis-trans isomerase activity; cis-trans isomerase activity;	K03768			IPR002130; IPR029000;	Cyclophilin-type peptidyl-prolyl cis-trans isomerase domain; Cyclophilin-like domain;
TERG_01576	hypothetical protein	nucleus	single-organism process; cellular process; cellular component organization or biogenesis;	cellular component organization; single-organism cellular process;	mitotic cell cycle; organelle organization; mitotic nuclear division; organelle fission; nuclear division; cell cycle process; mitotic cell cycle process; cell cycle;	cell; organelle;	organelle part; non-membrane-bounded organelle; cell part; membrane-bounded organelle;	intracellular organelle; intracellular non-membrane-bounded organelle; intracellular organelle part; intracellular part; chromosomal part; intracellular membrane-bounded organelle; chromosomal region; nucleus; intracellular; chromosome; chromosome, centromeric region;				K11578
TERG_01577	Zinc metalloprotease, putative	cytoplasm							catalytic activity; binding;	ion binding;	metal ion binding; cation binding;				IPR011249;	"Metalloenzyme, LuxS/M16 peptidase-like; "
TERG_01578	hypothetical protein
TERG_01579	hypothetical protein
TERG_01583	CaaX prenyl protease Ste24	plasma membrane	metabolic process;	primary metabolic process; organic substance metabolic process;	proteolysis; macromolecule metabolic process; protein metabolic process;				catalytic activity;	hydrolase activity;	endopeptidase activity; metalloendopeptidase activity; peptidase activity; peptidase activity, acting on L-amino acid peptides; metallopeptidase activity;	K06013	STE24; STE24 endopeptidase [EC:3.4.24.84]	ko01130 Biosynthesis of antibiotics; ko00900 Terpenoid backbone biosynthesis;	IPR032456; IPR001915;	"CAAX prenyl protease 1, N-terminal; peptidase M48; "
TERG_01585	60S ribosomal protein L34	cytoplasm	cytoplasmic translation			cytoplasm			structural constituent of ribosome
TERG_01587	eukaryotic translation initiation factor 2 subunit gamma	cytoplasm							catalytic activity; binding;	ion binding; hydrolase activity; organic cyclic compound binding; heterocyclic compound binding; carbohydrate derivative binding; small molecule binding;	nucleoside phosphate binding; nucleoside binding; hydrolase activity, acting on acid anhydrides; nucleotide binding; nucleoside-triphosphatase activity; ribonucleoside binding; pyrophosphatase activity; ribonucleotide binding; GTPase activity; purine ribonucleoside binding; anion binding; purine ribonucleotide binding; purine nucleoside binding; guanyl ribonucleotide binding; hydrolase activity, …	K03242	EIF2S3; translation initiation factor 2 subunit 3	ko03013 RNA transport;	IPR004161; IPR009001; IPR027417; IPR015256; IPR000795; IPR009000;	"Translation elongation factor EFTu-like, domain 2; Translation elongation factor EF1A/initiation factor IF2gamma, C-terminal; P-loop containing nucleoside triphosphate hydrolase; Translation initiation factor 2, gamma subunit, C-terminal; Transcription factor, GTP-binding domain; Translation protein, beta-barrel domain; "
TERG_01589	MYB and HSA domain protein	nucleus							binding;	organic cyclic compound binding; heterocyclic compound binding;	DNA binding; nucleic acid binding;	K11397			IPR001005; IPR009057; IPR014012; IPR017877;	SANT/Myb domain; Homeobox domain-like; Helicase/SANT-associated domain; Myb-like domain;
TERG_01591	Small nucleolar ribonucleoprotein complex subunit, putative	cytoplasm	metabolic process; cellular process; cellular component organization or biogenesis;	cellular component biogenesis; nitrogen compound metabolic process; primary metabolic process; cellular metabolic process; organic substance metabolic process;	rRNA metabolic process; RNA processing; ncRNA processing; ribonucleoprotein complex biogenesis; cellular aromatic compound metabolic process; ribosome biogenesis; organic cyclic compound metabolic process; RNA metabolic process; nucleic acid metabolic process; heterocycle metabolic process; nucleobase-containing compound metabolic process; rRNA processing; cellular macromolecule metabolic process…	macromolecular complex; cell;	cell part; ribonucleoprotein complex;	intracellular; intracellular part; small-subunit processome; intracellular ribonucleoprotein complex; preribosome;	binding;	protein binding;		K14555	UTP13; U3 small nucleolar RNA-associated protein 13	ko03008 Ribosome biogenesis in eukaryotes;	IPR017986; IPR015943; IPR013934; IPR011047;	"WD40-repeat-containing domain; WD40/YVTN repeat-like-containing domain; Small-subunit processome, Utp13; Quinoprotein alcohol dehydrogenase-like superfamily; "
TERG_01599	hypothetical protein
TERG_01602	proteasome component PUP3	extracellular	metabolic process; cellular process;	primary metabolic process; cellular metabolic process; organic substance metabolic process; catabolic process;	modification-dependent macromolecule catabolic process; proteolysis involved in cellular protein catabolic process; cellular macromolecule catabolic process; cellular protein catabolic process; modification-dependent protein catabolic process; cellular protein metabolic process; ubiquitin-dependent protein catabolic process; proteasomal protein catabolic process; organic substance catabolic proce…	macromolecular complex; cell;	catalytic complex; cell part; protein complex;	proteasome complex; intracellular; proteasome core complex; intracellular part; peptidase complex; proteasome core complex, beta-subunit complex; endopeptidase complex;	catalytic activity;	hydrolase activity;	endopeptidase activity; threonine-type endopeptidase activity; peptidase activity; threonine-type peptidase activity; peptidase activity, acting on L-amino acid peptides;	K02735	PSMB3; 20S proteasome subunit beta 3 [EC:3.4.25.1]	ko03050 Proteasome;	IPR029055;	"Nucleophile aminohydrolases, N-terminal; "
TERG_01603	UBX domain protein, putative	mitochondria							binding;	protein binding;		K15627	ASPSCR1; tether containing UBX domain for GLUT4	ko05202 Transcriptional misregulation in cancer;	IPR001012; IPR029071; IPR021569;	UBX domain; Ubiquitin-related domain; TUG ubiquitin-like domain;
TERG_01604	60S ribosomal protein L36
TERG_01605	Sensor histidine kinase/response regulator, putative	nucleus	single-organism process; signaling; response to stimulus; metabolic process; cellular process; biological regulation;	single organism signaling; cellular response to stimulus; cellular metabolic process; regulation of biological process; cell communication;	regulation of cellular process; phosphorylation; intracellular signal transduction; phosphorelay signal transduction system; phosphate-containing compound metabolic process; signal transduction; phosphorus metabolic process;				catalytic activity;	transferase activity;	transferase activity, transferring phosphorus-containing groups;				IPR011006; IPR005467; IPR001789; IPR003594; IPR004358;	"CheY-like superfamily; Histidine kinase domain; Signal transduction response regulator, receiver domain; Histidine kinase-like ATPase, C-terminal domain; Signal transduction histidine kinase-related protein, C-terminal; "
TERG_01607	hypothetical protein
TERG_01612	enolase	cytoplasm	single-organism process; metabolic process; cellular process;	cellular metabolic process; single-organism cellular process; single-organism metabolic process; organic substance metabolic process; nitrogen compound metabolic process; primary metabolic process; catabolic process;	ATP generation from ADP; nucleoside metabolic process; purine nucleoside metabolic process; nucleoside diphosphate phosphorylation; ADP metabolic process; pyridine nucleotide metabolic process; glycolytic process; purine ribonucleoside monophosphate metabolic process; nucleotide metabolic process; ribonucleoside diphosphate metabolic process; nucleotide phosphorylation; purine nucleoside diphosph…	macromolecular complex; cell;	catalytic complex; cell part;	intracellular; cytoplasm; intracellular part; cytosolic part; cytosol; phosphopyruvate hydratase complex; cytoplasmic part;	catalytic activity; binding;	ion binding; lyase activity;	magnesium ion binding; phosphopyruvate hydratase activity; metal ion binding; cation binding; hydro-lyase activity; carbon-oxygen lyase activity;	K01689	ENO; enolase [EC:4.2.1.11]	ko01130 Biosynthesis of antibiotics; ko01110 Biosynthesis of secondary metabolites; ko01230 Biosynthesis of amino acids; ko01100 Metabolic pathways; ko00680 Methane metabolism; ko01120 Microbial metabolism in diverse environments; ko01200 Carbon metabolism; ko03018 RNA degradation; ko00010 Glycolysis / Gluconeogenesis; ko04066 HIF-1 signaling pathway;	IPR029065; IPR020810; IPR029017; IPR020811;	"Enolase C-terminal domain-like; Enolase, C-terminal TIM barrel domain; Enolase N-terminal domain-like; Enolase, N-terminal; "
TERG_01613	Eukaryotic translation initiation factor 3 subunit J	nucleus				macromolecular complex; cell;	cell part; protein complex;	intracellular; cytoplasm; intracellular part; cytoplasmic part; eukaryotic translation initiation factor 3 complex;	binding;	organic cyclic compound binding; heterocyclic compound binding;	RNA binding; translation factor activity, RNA binding; nucleic acid binding; translation initiation factor activity;	K03245	EIF3J; translation initiation factor 3 subunit J	ko03013 RNA transport;	IPR023194;	Eukaryotic translation initiation factor 3-like domain;
TERG_01614	14-3-3 family protein	cytoplasm, endosome				cytoplasm, endosome			protein binding; protein domain specific binding	protein binding;	protein domain specific binding;	K06630	YWHAE; 14-3-3 protein epsilon	ko04722 Neurotrophin signaling pathway; ko04110 Cell cycle; ko04391 Hippo signaling pathway - fly; ko05203 Viral carcinogenesis; ko04390 Hippo signaling pathway; ko04151 PI3K-Akt signaling pathway; ko04114 Oocyte meiosis; ko05169 Epstein-Barr virus infection; ko04011 MAPK signaling pathway - yeast;	IPR023410;	14-3-3 domain;
TERG_01617	subtilisin-like protease 4
TERG_01618	hypothetical protein
TERG_01621	DnaJ chaperone (Caj1), putative	nucleus													IPR001623;	DnaJ domain;
TERG_01622	hypothetical protein
TERG_01623	MFS toxin efflux pump, putative	plasma membrane	localization;	establishment of localization;	transport; transmembrane transport;	membrane;	membrane part;	intrinsic component of membrane; integral component of membrane;							IPR020846;	Major facilitator superfamily domain;
TERG_01624	Phosphomannomutase	cyto_nucl	metabolic process; cellular process;	nitrogen compound metabolic process; biosynthetic process; primary metabolic process; cellular metabolic process; organic substance metabolic process;	nucleotide-sugar biosynthetic process; heterocycle biosynthetic process; cellular aromatic compound metabolic process; nucleobase-containing compound biosynthetic process; organic cyclic compound metabolic process; organic substance biosynthetic process; cellular biosynthetic process; heterocycle metabolic process; GDP-mannose metabolic process; carbohydrate derivative biosynthetic process; cellu…	cell;	cell part;	intracellular part; intracellular; cytoplasm;	catalytic activity;	isomerase activity;	phosphomannomutase activity; intramolecular transferase activity; intramolecular transferase activity, phosphotransferases;	K17497	PMM; phosphomannomutase [EC:5.4.2.8]	ko00051 Fructose and mannose metabolism; ko01110 Biosynthesis of secondary metabolites; ko01100 Metabolic pathways; ko00520 Amino sugar and nucleotide sugar metabolism;	IPR023214;	HAD-like domain;
TERG_01625	DUF1640 domain protein	mitochondria
TERG_01628	hypothetical protein
TERG_01629	CAMK/CAMKL/MARK protein kinase
TERG_01631	hypothetical protein
TERG_01632	hypothetical protein
TERG_01633	hypothetical protein
TERG_01634	MFS transporter, putative	plasma membrane	localization;	establishment of localization;	transport; transmembrane transport;	membrane;	membrane part;	intrinsic component of membrane; integral component of membrane;							IPR020846;	Major facilitator superfamily domain;
TERG_01635	hypothetical protein
TERG_01637	hypothetical protein
TERG_01638	hypothetical protein
TERG_01639	DnaJ domain protein	extracellular													IPR001623;	DnaJ domain;
TERG_01640	hypothetical protein
TERG_01641	hypothetical protein
TERG_01643	hypothetical protein
TERG_01644	hypothetical protein
TERG_01645	hypothetical protein
TERG_01648	WW domain protein	nucleus							binding;	protein binding;					IPR001202;	WW domain;
TERG_01650	Actin-related protein 2/3 complex subunit 1A, putative	cytoplasm	single-organism process; cellular process; cellular component organization or biogenesis; biological regulation;	cellular component organization; regulation of biological quality; single-organism cellular process; regulation of biological process;	regulation of actin filament polymerization; regulation of cellular process; Arp2/3 complex-mediated actin nucleation; positive regulation of protein polymerization; regulation of actin cytoskeleton organization; actin filament organization; regulation of cellular component biogenesis; regulation of actin filament length; positive regulation of cellular component organization; actin cytoskeleton …	macromolecular complex; cell; organelle;	organelle part; non-membrane-bounded organelle; cell part; protein complex;	intracellular organelle; intracellular non-membrane-bounded organelle; cytoskeletal part; intracellular organelle part; intracellular part; actin cytoskeleton; cytoskeleton; Arp2/3 protein complex; intracellular;	binding;	protein binding;		K05757	"ARPC1A_B; actin related protein 2/3 complex, subunit 1A/1B"""	ko05100 Bacterial invasion of epithelial cells; ko05132 Salmonella infection; ko04810 Regulation of actin cytoskeleton; ko05131 Shigellosis; ko05130 Pathogenic Escherichia coli infection; ko04666 Fc gamma R-mediated phagocytosis; ko04144 Endocytosis;	IPR017986; IPR015943;	WD40-repeat-containing domain; WD40/YVTN repeat-like-containing domain;
TERG_01651	hypothetical protein
TERG_01652	hypothetical protein
TERG_01655	hypothetical protein
TERG_01657	hypothetical protein
TERG_01660	Succinate dehydrogenase assembly factor 1, mitochondrial	nucleus										K18167
TERG_01662	Proteasome subunit beta type	cyto_nucl	metabolic process; cellular process;	primary metabolic process; cellular metabolic process; organic substance metabolic process; catabolic process;	proteolysis involved in cellular protein catabolic process; cellular macromolecule catabolic process; cellular protein catabolic process; cellular protein metabolic process; organic substance catabolic process; protein catabolic process; macromolecule catabolic process; cellular macromolecule metabolic process; cellular catabolic process; proteolysis; protein metabolic process; macromolecule meta…	macromolecular complex; cell;	catalytic complex; cell part; protein complex;	proteasome complex; intracellular; proteasome core complex; intracellular part; peptidase complex; endopeptidase complex;	catalytic activity;	hydrolase activity;	endopeptidase activity; threonine-type endopeptidase activity; peptidase activity; threonine-type peptidase activity; peptidase activity, acting on L-amino acid peptides;	K02736	PSMB4; 20S proteasome subunit beta 7 [EC:3.4.25.1]	ko03050 Proteasome;	IPR029055;	"Nucleophile aminohydrolases, N-terminal; "
TERG_01663	hypothetical protein
TERG_01664	Proteasome component Prs3, putative	cytoplasm	metabolic process; cellular process;	primary metabolic process; cellular metabolic process; organic substance metabolic process; catabolic process;	proteolysis involved in cellular protein catabolic process; cellular macromolecule catabolic process; cellular protein catabolic process; cellular protein metabolic process; organic substance catabolic process; protein catabolic process; macromolecule catabolic process; cellular macromolecule metabolic process; cellular catabolic process; proteolysis; protein metabolic process; macromolecule meta…	macromolecular complex; cell;	catalytic complex; cell part; protein complex;	proteasome complex; intracellular; proteasome core complex; intracellular part; peptidase complex; endopeptidase complex;	catalytic activity;	hydrolase activity;	endopeptidase activity; threonine-type endopeptidase activity; peptidase activity; threonine-type peptidase activity; peptidase activity, acting on L-amino acid peptides;	K02732	PSMB1; 20S proteasome subunit beta 6 [EC:3.4.25.1]	ko03050 Proteasome;	IPR029055;	"Nucleophile aminohydrolases, N-terminal; "
TERG_01666	Mitochondrion biogenesis protein (Mdm31), putative	mitochondrion	localization; cellular process; cellular component organization or biogenesis; cellular ion homeostasis	cellular component organization; cellular localization;	organelle localization; mitochondrion localization; mitochondrion distribution; organelle organization; organelle inheritance; mitochondrion organization; mitochondrion inheritance;	mitochondrion	organelle part; cell part; membrane-bounded organelle;	intracellular organelle; mitochondrial part; organelle membrane; organelle envelope; intracellular organelle part; cytoplasm; intracellular part; mitochondrion; mitochondrial envelope; intracellular membrane-bounded organelle; intracellular; envelope; organelle inner membrane; mitochondrial inner membrane; mitochondrial membrane; cytoplasmic part;				K17979
TERG_01669	Methyltransferase, putative	nucleus	metabolic process;						catalytic activity;	transferase activity;	transferase activity, transferring one-carbon groups; methyltransferase activity;	K19306			IPR029063; IPR013216;	S-adenosyl-L-methionine-dependent methyltransferase; Methyltransferase type 11;
TERG_01675	Proteasome subunit alpha type	cytoplasm	metabolic process; cellular process;	primary metabolic process; cellular metabolic process; organic substance metabolic process; catabolic process;	modification-dependent macromolecule catabolic process; cellular macromolecule catabolic process; proteolysis involved in cellular protein catabolic process; cellular protein catabolic process; modification-dependent protein catabolic process; cellular protein metabolic process; ubiquitin-dependent protein catabolic process; organic substance catabolic process; protein catabolic process; macromol…	macromolecular complex; cell;	catalytic complex; cell part; protein complex;	proteasome core complex, alpha-subunit complex; proteasome complex; intracellular; proteasome core complex; intracellular part; peptidase complex; endopeptidase complex;	catalytic activity;	hydrolase activity;	endopeptidase activity; threonine-type endopeptidase activity; peptidase activity; threonine-type peptidase activity; peptidase activity, acting on L-amino acid peptides;	K02727	PSMA3; 20S proteasome subunit alpha 7 [EC:3.4.25.1]	ko03050 Proteasome;	IPR000426; IPR029055;	"Proteasome alpha-subunit, N-terminal domain; Nucleophile aminohydrolases, N-terminal; "
TERG_01676	6,7-dimethyl-8-ribityllumazine synthase	cytoplasm	single-organism process; metabolic process; cellular process;	single-organism cellular process; nitrogen compound metabolic process; biosynthetic process; cellular metabolic process; organic substance metabolic process; single-organism metabolic process;	vitamin biosynthetic process; heterocycle biosynthetic process; single-organism biosynthetic process; riboflavin biosynthetic process; small molecule metabolic process; organic cyclic compound metabolic process; flavin-containing compound biosynthetic process; organonitrogen compound biosynthetic process; organic substance biosynthetic process; cellular biosynthetic process; vitamin metabolic pro…	macromolecular complex; cell;	catalytic complex; cell part;	transferase complex; riboflavin synthase complex;				K00794	"ribH; 6,7-dimethyl-8-ribityllumazine synthase [EC:2.5.1.78]"""	ko01110 Biosynthesis of secondary metabolites; ko01100 Metabolic pathways; ko00740 Riboflavin metabolism;
TERG_01677	glutamine-fructose-6-phosphate transaminase	cytoplasm	metabolic process;	primary metabolic process; organic substance metabolic process;	carbohydrate metabolic process;				binding;	carbohydrate binding;		K00820	glmS; glucosamine--fructose-6-phosphate aminotransferase (isomerizing) [EC:2.6.1.16]	ko01130 Biosynthesis of antibiotics; ko01100 Metabolic pathways; ko04931 Insulin resistance; ko00620 Pyruvate metabolism; ko00520 Amino sugar and nucleotide sugar metabolism;	IPR029055; IPR001347;	"Nucleophile aminohydrolases, N-terminal; Sugar isomerase (SIS); "
TERG_01679	AdoMet-dependent tRNA methyltransferase (MTase) complex subunit	mitochondria										K15448
TERG_01680	hypothetical protein
TERG_01682	methylthioribose-1-phosphate isomerase	cytoplasm	metabolic process; cellular process;	biosynthetic process; cellular metabolic process;	cellular biosynthetic process;							K08963	mtnA; methylthioribose-1-phosphate isomerase [EC:5.3.1.23]	ko00270 Cysteine and methionine metabolism; ko01100 Metabolic pathways;	IPR027363;	"Methylthioribose-1-phosphate isomerase-like, N-terminal domain; "
TERG_01683	hypothetical protein
TERG_01686	hypothetical protein
TERG_01689	F-box domain protein	nucleus							binding;	protein binding;					IPR011990; IPR013026;	Tetratricopeptide-like helical domain; Tetratricopeptide repeat-containing domain;
TERG_01691	hypothetical protein
TERG_01693	Kinesin-like protein	nucleus	single-organism process; cellular process;	single-organism cellular process; microtubule-based process;	microtubule-based movement; movement of cell or subcellular component;				catalytic activity; binding;	protein binding; hydrolase activity; organic cyclic compound binding; heterocyclic compound binding; ion binding; carbohydrate derivative binding; small molecule binding;	motor activity; nucleoside phosphate binding; hydrolase activity, acting on acid anhydrides; cytoskeletal protein binding; pyrophosphatase activity; ribonucleotide binding; microtubule binding; purine ribonucleoside binding; anion binding; adenyl ribonucleotide binding; adenyl nucleotide binding; hydrolase activity, acting on acid anhydrides, in phosphorus-containing anhydrides; microtubule motor…	K11498			IPR027417; IPR001752;	P-loop containing nucleoside triphosphate hydrolase; Kinesin motor domain;
TERG_01695	hypothetical protein
TERG_01696	Diacylglycerol o-acyltransferase	plasma membrane							catalytic activity;	transferase activity;	transferase activity, transferring acyl groups; transferase activity, transferring acyl groups other than amino-acyl groups;	K14457	MOGAT2; 2-acylglycerol O-acyltransferase 2 [EC:2.3.1.22]	ko04975 Fat digestion and absorption; ko00561 Glycerolipid metabolism;
TERG_01697	hypothetical protein
TERG_01701	CMGC/CDK/CDK7 protein kinase	cytoplasm	metabolic process; cellular process;	primary metabolic process; cellular metabolic process; organic substance metabolic process;	phosphorylation; cellular protein metabolic process; phosphate-containing compound metabolic process; protein phosphorylation; phosphorus metabolic process; cellular macromolecule metabolic process; cellular protein modification process; protein metabolic process; macromolecule metabolic process; protein modification process; macromolecule modification;				catalytic activity; binding;	ion binding; organic cyclic compound binding; heterocyclic compound binding; carbohydrate derivative binding; transferase activity; small molecule binding;	ATP binding; nucleoside phosphate binding; phosphotransferase activity, alcohol group as acceptor; nucleoside binding; protein kinase activity; nucleotide binding; ribonucleoside binding; kinase activity; ribonucleotide binding; purine ribonucleoside binding; anion binding; purine ribonucleotide binding; adenyl ribonucleotide binding; adenyl nucleotide binding; purine nucleoside binding; transfer…	K02202	CDK7; cyclin-dependent kinase 7 [EC:2.7.11.22 2.7.11.23]	ko04110 Cell cycle; ko03022 Basal transcription factors; ko03420 Nucleotide excision repair;	IPR000719; IPR011009;	Protein kinase domain; Protein kinase-like domain;
TERG_01703	14-alpha sterol demethylase Cyp51B	cytoplasm	single-organism process; metabolic process;	single-organism metabolic process;	oxidation-reduction process;				catalytic activity; binding;	organic cyclic compound binding; heterocyclic compound binding; ion binding; oxidoreductase activity;	heme binding; iron ion binding; transition metal ion binding; cation binding; metal ion binding; oxidoreductase activity, acting on paired donors, with incorporation or reduction of molecular oxygen; monooxygenase activity; tetrapyrrole binding;	K05917	CYP51; sterol 14-demethylase [EC:1.14.13.70]	ko01130 Biosynthesis of antibiotics; ko00100 Steroid biosynthesis; ko01110 Biosynthesis of secondary metabolites; ko01100 Metabolic pathways;
TERG_01704	CAMK protein kinase	nucleus	metabolic process; cellular process;	primary metabolic process; cellular metabolic process; organic substance metabolic process;	phosphorylation; cellular protein metabolic process; phosphate-containing compound metabolic process; protein phosphorylation; phosphorus metabolic process; cellular macromolecule metabolic process; cellular protein modification process; protein metabolic process; macromolecule metabolic process; protein modification process; macromolecule modification;				catalytic activity; binding;	ion binding; protein binding; organic cyclic compound binding; heterocyclic compound binding; carbohydrate derivative binding; transferase activity; small molecule binding;	ATP binding; nucleoside phosphate binding; phosphotransferase activity, alcohol group as acceptor; nucleoside binding; protein kinase activity; nucleotide binding; ribonucleoside binding; kinase activity; ribonucleotide binding; purine ribonucleoside binding; anion binding; purine ribonucleotide binding; adenyl ribonucleotide binding; adenyl nucleotide binding; purine nucleoside binding; transfer…	K06641	CHK2; serine/threonine-protein kinase Chk2 [EC:2.7.11.1]	ko04115 p53 signaling pathway; ko04110 Cell cycle; ko05166 HTLV-I infection; ko04111 Cell cycle - yeast;	IPR008984; IPR000719; IPR000253; IPR011009;	SMAD/FHA domain; Protein kinase domain; Forkhead-associated (FHA) domain; Protein kinase-like domain;
TERG_01705	phosphatidylinositol kinase	mitochondria							catalytic activity; binding;	transferase activity;	kinase activity; transferase activity, transferring phosphorus-containing groups;	K00888	PI4KA; phosphatidylinositol 4-kinase A [EC:2.7.1.67]	ko04070 Phosphatidylinositol signaling system; ko01100 Metabolic pathways; ko04011 MAPK signaling pathway - yeast; ko00562 Inositol phosphate metabolism;	IPR001263; IPR000403; IPR016024; IPR011009;	"Phosphoinositide 3-kinase, accessory (PIK) domain; Phosphatidylinositol 3-/4-kinase, catalytic domain; Armadillo-type fold; Protein kinase-like domain; "
TERG_01706	serine/threonine protein kinase
TERG_01707	hypothetical protein
TERG_01710	U6 snRNA-associated Sm-like protein LSm5
TERG_01713	hypothetical protein
TERG_01715	hypothetical protein
TERG_01716	RhoGAP and Fes/CIP4 domain protein	nucleus	single-organism process; signaling; response to stimulus; cellular process; biological regulation;	single organism signaling; cellular response to stimulus; regulation of biological process; cell communication;	regulation of cellular process; signal transduction; intracellular signal transduction;										IPR011991; IPR031160; IPR008936; IPR000591; IPR000198;	Winged helix-turn-helix DNA-binding domain; F-BAR domain; Rho GTPase activation protein; DEP domain; Rho GTPase-activating protein domain;
TERG_01717	hypothetical protein
TERG_01718	hypothetical protein
TERG_01719	UBX domain protein (Ubx5), putative	nucleus							binding;	protein binding;					IPR006577; IPR001012; IPR029071; IPR012336; IPR009060;	UAS; UBX domain; Ubiquitin-related domain; Thioredoxin-like fold; UBA-like;
TERG_01722	hypothetical protein
TERG_01730	hypothetical protein
TERG_01731	hypothetical protein	extracellular
TERG_01733	Alcohol dehydrogenase, putative	cytoplasm	single-organism process; metabolic process;	single-organism metabolic process;	oxidation-reduction process;							K13953	"adhP; alcohol dehydrogenase, propanol-preferring [EC:1.1.1.1]"""	ko00830 Retinol metabolism; ko01130 Biosynthesis of antibiotics; ko00071 Fatty acid degradation; ko01110 Biosynthesis of secondary metabolites; ko01100 Metabolic pathways; ko00350 Tyrosine metabolism; ko00980 Metabolism of xenobiotics by cytochrome P450; ko01120 Microbial metabolism in diverse environments; ko00010 Glycolysis / Gluconeogenesis; ko00625 Chloroalkane and chloroalkene degradation; k…	IPR011032; IPR016040; IPR013149;	"GroES-like; NAD(P)-binding domain; Alcohol dehydrogenase, C-terminal; "
TERG_01736	hypothetical protein
TERG_01737	C2H2 zinc finger protein	nucleus							binding;	organic cyclic compound binding; heterocyclic compound binding; ion binding;	nucleic acid binding; cation binding; metal ion binding;				IPR015880; IPR007087; IPR013087;	"Zinc finger, C2H2-like; Zinc finger, C2H2; Zinc finger C2H2-type/integrase DNA-binding domain; "
TERG_01739	hypothetical protein
TERG_01742	hypothetical protein	cytoplasm													IPR029069;	HotDog domain;
TERG_01743	Thioesterase family protein	peroxisome													IPR006683; IPR029069;	Thioesterase domain; HotDog domain;
TERG_01747	Uridylate kinase	nucleus	single-organism process; metabolic process; cellular process;	biosynthetic process; cellular metabolic process; organic substance metabolic process; single-organism cellular process; nitrogen compound metabolic process; primary metabolic process; single-organism metabolic process;	nucleotide biosynthetic process; cellular aromatic compound metabolic process; nucleotide metabolic process; pyrimidine nucleotide biosynthetic process; organonitrogen compound biosynthetic process; phosphate-containing compound metabolic process; pyrimidine-containing compound biosynthetic process; heterocycle metabolic process; aromatic compound biosynthetic process; nucleobase-containing compo…				catalytic activity; binding;	ion binding; organic cyclic compound binding; heterocyclic compound binding; carbohydrate derivative binding; transferase activity; small molecule binding;	ATP binding; nucleoside phosphate binding; nucleobase-containing compound kinase activity; nucleoside binding; uridylate kinase activity; nucleotide binding; phosphotransferase activity, phosphate group as acceptor; nucleotide kinase activity; cytidylate kinase activity; ribonucleoside binding; kinase activity; ribonucleotide binding; purine ribonucleoside binding; anion binding; purine ribonucle…	K13800	CMPK1; UMP-CMP kinase [EC:2.7.4.- 2.7.4.14]	ko01100 Metabolic pathways; ko00240 Pyrimidine metabolism;	IPR027417;	P-loop containing nucleoside triphosphate hydrolase;
TERG_01751	Sodium/calcium exchanger protein	plasma membrane	localization;	establishment of localization;	transport; transmembrane transport;	membrane;	membrane part;	intrinsic component of membrane; integral component of membrane;				K13754			IPR004837;	Sodium/calcium exchanger membrane region;
TERG_01752	actin cytoskeleton-regulatory complex protein PAN1	nucleus							binding;	ion binding; protein binding;	cytoskeletal protein binding; actin binding; metal ion binding; cation binding; calcium ion binding;	K20047			IPR003124; IPR000261; IPR002048; IPR011992; IPR013182;	WH2 domain; EH domain; EF-hand domain; EF-hand domain pair; Domain of unknown function DUF1720;
TERG_01753	DNA-directed RNA polymerase II subunit RPB11a, putative	nucleus	metabolic process; cellular process;	nitrogen compound metabolic process; biosynthetic process; primary metabolic process; cellular metabolic process; organic substance metabolic process;	heterocycle biosynthetic process; cellular aromatic compound metabolic process; nucleic acid-templated transcription; nucleobase-containing compound biosynthetic process; organic cyclic compound metabolic process; RNA biosynthetic process; organic substance biosynthetic process; cellular biosynthetic process; RNA metabolic process; cellular macromolecule biosynthetic process; nucleic acid metabol…				catalytic activity; binding;	organic cyclic compound binding; heterocyclic compound binding; protein binding; transferase activity;	DNA binding; nucleotidyltransferase activity; 5'-3' RNA polymerase activity; RNA polymerase activity; protein dimerization activity; nucleic acid binding; DNA-directed 5'-3' RNA polymerase activity; transferase activity, transferring phosphorus-containing groups;	K03008	RPB11; DNA-directed RNA polymerase II subunit RPB11	ko00230 Purine metabolism; ko05169 Epstein-Barr virus infection; ko01100 Metabolic pathways; ko00240 Pyrimidine metabolism; ko05016 Huntington's disease; ko03020 RNA polymerase;	IPR009025;	"DNA-directed RNA polymerase, RBP11-like dimerisation domain; "
TERG_01755	hypothetical protein	nucleus
TERG_01757	hypothetical protein
TERG_01758	C2 domain protein	nucleus							binding;	protein binding;					IPR000008;	C2 domain;
TERG_01760	hypothetical protein
TERG_01761	hypothetical protein
TERG_01764	RAS small monomeric GTPase Rab6, putative	nucleus	single-organism process; signaling; response to stimulus; cellular process; biological regulation;	single organism signaling; cellular response to stimulus; regulation of biological process; cell communication;	regulation of cellular process; signal transduction; intracellular signal transduction; small GTPase mediated signal transduction;				binding;	ion binding; organic cyclic compound binding; heterocyclic compound binding; carbohydrate derivative binding; small molecule binding;	nucleoside phosphate binding; nucleoside binding; nucleotide binding; ribonucleoside binding; ribonucleotide binding; purine ribonucleoside binding; anion binding; purine ribonucleotide binding; purine nucleoside binding; guanyl ribonucleotide binding; guanyl nucleotide binding; GTP binding; purine nucleotide binding; purine ribonucleoside triphosphate binding;	K07893			IPR005225; IPR027417;	Small GTP-binding protein domain; P-loop containing nucleoside triphosphate hydrolase;
TERG_01765	hypothetical protein
TERG_01766	Molybdenum cofactor biosynthesis protein Gephyrin, putative	mitochondria	single-organism process; metabolic process; cellular process;	biosynthetic process; cellular metabolic process; organic substance metabolic process; single-organism cellular process; nitrogen compound metabolic process; primary metabolic process; single-organism metabolic process;	cofactor biosynthetic process; nucleoside metabolic process; purine nucleoside metabolic process; cellular aromatic compound metabolic process; molybdopterin cofactor metabolic process; molybdopterin cofactor biosynthetic process; ribonucleotide metabolic process; nucleotide metabolic process; cellular protein metabolic process; Mo-molybdopterin cofactor biosynthetic process; organonitrogen compo…							K15376	GPHN; gephyrin [EC:2.10.1.1 2.7.7.75]	ko04727 GABAergic synapse;	IPR005110; IPR001453; IPR005111;	"MoeA, N-terminal and linker domain; MoaB/Mog domain; MoeA, C-terminal, domain IV; "
TERG_01767	DDHD domain protein	nucleus							binding;	ion binding;	metal ion binding; cation binding;				IPR004177;	DDHD domain;
TERG_01768	hypothetical protein
TERG_01776	hypothetical protein
TERG_01777	GTP-binding protein rhoC	nucleus	single-organism process; signaling; response to stimulus; cellular process; biological regulation;	single organism signaling; cellular response to stimulus; regulation of biological process; cell communication;	regulation of cellular process; signal transduction; intracellular signal transduction; small GTPase mediated signal transduction;				binding;	ion binding; organic cyclic compound binding; heterocyclic compound binding; carbohydrate derivative binding; small molecule binding;	nucleoside phosphate binding; nucleoside binding; nucleotide binding; ribonucleoside binding; ribonucleotide binding; purine ribonucleoside binding; anion binding; purine ribonucleotide binding; purine nucleoside binding; guanyl ribonucleotide binding; guanyl nucleotide binding; GTP binding; purine nucleotide binding; purine ribonucleoside triphosphate binding;				IPR005225; IPR027417;	Small GTP-binding protein domain; P-loop containing nucleoside triphosphate hydrolase;
TERG_01778	Sphingosine-1-phosphate phosphohydrolase	plasma membrane													IPR000326;	Phosphatidic acid phosphatase type 2/haloperoxidase;
TERG_01780	hypothetical protein
TERG_01784	3-oxoacyl-(Acyl-carrier-protein) reductase	mitochondria													IPR016040;	NAD(P)-binding domain;
TERG_01785	HIT finger domain protein, putative	cyto_nucl
TERG_01789	NADPH-cytochrome P450 reductase	cytoplasm	single-organism process; metabolic process;	single-organism metabolic process;	oxidation-reduction process;				catalytic activity; binding;	ion binding; cofactor binding; oxidoreductase activity; heterocyclic compound binding; organic cyclic compound binding; carbohydrate derivative binding; small molecule binding;	oxidoreductase activity, acting on NAD(P)H; nucleoside phosphate binding; oxidoreductase activity, acting on NAD(P)H, heme protein as acceptor; nucleotide binding; NADPH-hemoprotein reductase activity; ribonucleotide binding; anion binding; FMN binding;	K00327			IPR017927; IPR001433; IPR017938; IPR008254; IPR029039; IPR023173; IPR003097; IPR001709;	"Ferredoxin reductase-type FAD-binding domain; Oxidoreductase FAD/NAD(P)-binding; Riboflavin synthase-like beta-barrel; Flavodoxin/nitric oxide synthase; Flavoprotein-like domain; NADPH-cytochrome p450 reductase, FAD-binding, alpha-helical domain-3; FAD-binding, type 1; Flavoprotein pyridine nucleotide cytochrome reductase; "
TERG_01792	Possible replication factor-a protein	cytoplasm	response to stimulus; metabolic process; cellular process;	cellular response to stimulus; response to stress; nitrogen compound metabolic process; biosynthetic process; primary metabolic process; cellular metabolic process; organic substance metabolic process;	cellular response to stress; DNA replication; cellular aromatic compound metabolic process; DNA metabolic process; organic cyclic compound metabolic process; organic substance biosynthetic process; cellular biosynthetic process; cellular response to DNA damage stimulus; DNA repair; cellular macromolecule biosynthetic process; nucleic acid metabolic process; heterocycle metabolic process; nucleoba…	organelle; cell;	cell part; membrane-bounded organelle;	intracellular membrane-bounded organelle; intracellular organelle; nucleus; intracellular; intracellular part;	binding;	organic cyclic compound binding; heterocyclic compound binding;	DNA binding; nucleic acid binding;	K10739	RFA2; replication factor A2	ko03430 Mismatch repair; ko03440 Homologous recombination; ko03460 Fanconi anemia pathway; ko03030 DNA replication; ko03420 Nucleotide excision repair;	IPR011991; IPR012340; IPR014892;	"Winged helix-turn-helix DNA-binding domain; Nucleic acid-binding, OB-fold; Replication protein A, C-terminal; "
TERG_01793	ATP-dependent RNA helicase DBP10	nucleus				organelle; cell;	cell part; membrane-bounded organelle;	intracellular membrane-bounded organelle; intracellular organelle; nucleus; intracellular; intracellular part;	catalytic activity; binding;	hydrolase activity; heterocyclic compound binding; organic cyclic compound binding; ion binding; carbohydrate derivative binding; small molecule binding;	nucleoside phosphate binding; ATP-dependent helicase activity; hydrolase activity, acting on acid anhydrides; ATPase activity; pyrophosphatase activity; ribonucleotide binding; purine ribonucleoside binding; anion binding; ATP-dependent RNA helicase activity; adenyl ribonucleotide binding; adenyl nucleotide binding; hydrolase activity, acting on acid anhydrides, in phosphorus-containing anhydride…	K14808			IPR011545; IPR014014; IPR012541; IPR014001; IPR027417; IPR001650;	"DEAD/DEAH box helicase domain; RNA helicase, DEAD-box type, Q motif; DBP10, C-terminal; Helicase superfamily 1/2, ATP-binding domain; P-loop containing nucleoside triphosphate hydrolase; Helicase, C-terminal; "
TERG_01794	hypothetical protein
TERG_01796	ATP-dependent RNA helicase dbp4	nucleus	RNA secondary structure unwinding; rRNA processing			nucleus			binding; ATP binding; nucleoside phosphate binding; nucleoside binding;ATP-dependent DNA/RNA helicase activity	ion binding; organic cyclic compound binding; heterocyclic compound binding; carbohydrate derivative binding; small molecule binding;	ATP binding; nucleoside phosphate binding; nucleoside binding; nucleotide binding; ribonucleoside binding; ribonucleotide binding; nucleic acid binding; purine ribonucleoside binding; anion binding; purine ribonucleotide binding; adenyl ribonucleotide binding; adenyl nucleotide binding; purine nucleoside binding; purine nucleotide binding; purine ribonucleoside triphosphate binding;	K14776			IPR011545; IPR014014; IPR025313; IPR014001; IPR027417; IPR001650;	"DEAD/DEAH box helicase domain; RNA helicase, DEAD-box type, Q motif; Domain of unknown function DUF4217; Helicase superfamily 1/2, ATP-binding domain; P-loop containing nucleoside triphosphate hydrolase; Helicase, C-terminal; "
TERG_01797	DnaJ domain protein	nucleus										K09528			IPR001623;	DnaJ domain;
TERG_01798	MATE efflux family protein subfamily, putative	plasma membrane	single-organism process; response to stimulus; localization;	response to chemical; single-organism localization; establishment of localization;	transport; response to drug; transmembrane transport; drug transport; single-organism transport; drug transmembrane transport;	membrane;			transporter activity;	drug transporter activity; transmembrane transporter activity;	active transmembrane transporter activity; secondary active transmembrane transporter activity; drug transmembrane transporter activity; antiporter activity;	K03327
TERG_01799	hypothetical protein
TERG_01800	isopentenyl-diphosphate delta-isomerase	peroxisome	single-organism process; metabolic process; cellular process;	single-organism cellular process; biosynthetic process; primary metabolic process; cellular metabolic process; organic substance metabolic process; single-organism metabolic process;	isoprenoid metabolic process; single-organism biosynthetic process; cellular lipid metabolic process; organic substance biosynthetic process; cellular biosynthetic process; lipid biosynthetic process; isoprenoid biosynthetic process; lipid metabolic process;				catalytic activity;	hydrolase activity; isomerase activity;	isopentenyl-diphosphate delta-isomerase activity; intramolecular oxidoreductase activity; intramolecular oxidoreductase activity, transposing C=C bonds;	K01823	idi; isopentenyl-diphosphate delta-isomerase [EC:5.3.3.2]	ko01130 Biosynthesis of antibiotics; ko01110 Biosynthesis of secondary metabolites; ko01100 Metabolic pathways; ko00900 Terpenoid backbone biosynthesis;	IPR015797; IPR000086;	NUDIX hydrolase domain-like; NUDIX hydrolase domain;
TERG_01803	Protein kinase (VPS15), putative	nucleus	metabolic process; cellular process;	primary metabolic process; cellular metabolic process; organic substance metabolic process;	phosphorylation; cellular protein metabolic process; phosphate-containing compound metabolic process; protein phosphorylation; phosphorus metabolic process; cellular macromolecule metabolic process; cellular protein modification process; protein metabolic process; macromolecule metabolic process; protein modification process; macromolecule modification;				catalytic activity; binding;	ion binding; protein binding; organic cyclic compound binding; heterocyclic compound binding; carbohydrate derivative binding; transferase activity; small molecule binding;	ATP binding; nucleoside phosphate binding; phosphotransferase activity, alcohol group as acceptor; nucleoside binding; protein kinase activity; nucleotide binding; ribonucleoside binding; kinase activity; ribonucleotide binding; purine ribonucleoside binding; anion binding; purine ribonucleotide binding; adenyl ribonucleotide binding; adenyl nucleotide binding; purine nucleoside binding; transfer…	K08333	"PIK3R4; phosphoinositide-3-kinase, regulatory subunit 4 [EC:2.7.11.1]"""	ko04140 Regulation of autophagy;	IPR000719; IPR017986; IPR011989; IPR015943; IPR016024;	Protein kinase domain; WD40-repeat-containing domain; Armadillo-like helical; WD40/YVTN repeat-like-containing domain; Armadillo-type fold;
TERG_01804	TBC domain protein, putative	nucleus										K20176			IPR000195;	Rab-GTPase-TBC domain;
TERG_01805	hypothetical protein	extracellular	metabolic process;	primary metabolic process; organic substance metabolic process;	proteolysis; macromolecule metabolic process; protein metabolic process;				catalytic activity;	hydrolase activity;	peptidase activity, acting on L-amino acid peptides; metallopeptidase activity; peptidase activity;				IPR008757; IPR024079;	"peptidase M6-like, domain; Metallopeptidase, catalytic domain; "
TERG_01811	Carboxylic ester hydrolase	plasma membrane													IPR029058; IPR002018;	"Alpha/Beta hydrolase fold; Carboxylesterase, type B; "
TERG_01813	hypothetical protein
TERG_01815	hypothetical protein
TERG_01816	Translocation protein (Sec66), putative	cytoplasm	localization;	establishment of localization; cellular localization; macromolecule localization;	intracellular transport; establishment of protein localization to endoplasmic reticulum; establishment of protein localization to organelle; protein localization to membrane; protein transmembrane transport; protein targeting to ER; organic substance transport; posttranslational protein targeting to membrane, translocation; protein transport; protein targeting; establishment of protein localizati…	membrane; macromolecular complex; cell; organelle;	organelle part; cell part; membrane part; membrane-bounded organelle; protein complex;	intracellular organelle; endoplasmic reticulum; nuclear outer membrane-endoplasmic reticulum membrane network; rough endoplasmic reticulum membrane; bounding membrane of organelle; organelle membrane; rough endoplasmic reticulum; membrane protein complex; cytoplasm; intracellular organelle part; endomembrane system; intracellular part; endoplasmic reticulum Sec complex; Sec62/Sec63 complex; intra…				K12273
TERG_01817	AAA family ATPase, putative	nucleus							binding;	ion binding; protein binding; organic cyclic compound binding; heterocyclic compound binding; carbohydrate derivative binding; small molecule binding;	ATP binding; nucleoside phosphate binding; nucleoside binding; nucleotide binding; ribonucleoside binding; ribonucleotide binding; purine ribonucleoside binding; anion binding; purine ribonucleotide binding; adenyl ribonucleotide binding; adenyl nucleotide binding; purine nucleoside binding; purine nucleotide binding; purine ribonucleoside triphosphate binding;				IPR003959; IPR027417; IPR001487;	"ATPase, AAA-type, core; P-loop containing nucleoside triphosphate hydrolase; Bromodomain; "
TERG_01819	protein CFT1	cytoplasm				organelle; cell;	cell part; membrane-bounded organelle;	intracellular membrane-bounded organelle; intracellular organelle; nucleus; intracellular; intracellular part;	binding;	organic cyclic compound binding; heterocyclic compound binding;	nucleic acid binding;	K14401	CPSF1; cleavage and polyadenylation specificity factor subunit 1	ko03015 mRNA surveillance pathway;	IPR004871;	"Cleavage/polyadenylation specificity factor, A subunit, C-terminal; "
TERG_01820	hypothetical protein
TERG_01825	Endonuclease III homolog	nucleus	response to stimulus; metabolic process; cellular process;	cellular response to stimulus; response to stress; nitrogen compound metabolic process; primary metabolic process; cellular metabolic process; organic substance metabolic process;	cellular response to stress; base-excision repair; cellular aromatic compound metabolic process; DNA metabolic process; base-excision repair, AP site formation; organic cyclic compound metabolic process; cellular response to DNA damage stimulus; DNA repair; heterocycle metabolic process; nucleic acid metabolic process; nucleobase-containing compound metabolic process; cellular macromolecule metab…	organelle; cell;	cell part; membrane-bounded organelle;	intracellular membrane-bounded organelle; intracellular organelle; nucleus; intracellular; intracellular part;	catalytic activity; binding;	lyase activity; hydrolase activity; heterocyclic compound binding; organic cyclic compound binding;	DNA binding; deoxyribonuclease activity; endodeoxyribonuclease activity; carbon-oxygen lyase activity; DNA-(apurinic or apyrimidinic site) lyase activity; hydrolase activity, hydrolyzing N-glycosyl compounds; hydrolase activity, acting on glycosyl bonds; nucleic acid binding; nuclease activity; hydrolase activity, acting on ester bonds; DNA N-glycosylase activity; endonuclease activity;	K10773	NTH; endonuclease III [EC:4.2.99.18]	ko03410 Base excision repair;	IPR011257; IPR023170; IPR003265;	"DNA glycosylase; Helix-turn-helix, base-excision DNA repair, C-terminal; HhH-GPD domain; "
TERG_01834	hypothetical protein
TERG_01837	hypothetical protein
TERG_01840	hypothetical protein
TERG_01841	hypothetical protein
TERG_01842	hypothetical protein
TERG_01843	Myo-inositol-phosphate synthase, putative	cytoplasm	single-organism process; metabolic process; cellular process;	biosynthetic process; cellular metabolic process; organic substance metabolic process; single-organism cellular process; primary metabolic process; single-organism metabolic process;	carbohydrate biosynthetic process; organic hydroxy compound metabolic process; alcohol metabolic process; inositol metabolic process; phospholipid biosynthetic process; inositol biosynthetic process; cellular lipid metabolic process; phosphate-containing compound metabolic process; lipid biosynthetic process; cellular carbohydrate metabolic process; cellular carbohydrate biosynthetic process; lip…				catalytic activity;	isomerase activity;	intramolecular lyase activity; inositol-3-phosphate synthase activity;	K01858	INO1; myo-inositol-1-phosphate synthase [EC:5.5.1.4]	ko01130 Biosynthesis of antibiotics; ko01100 Metabolic pathways; ko00562 Inositol phosphate metabolism; ko00521 Streptomycin biosynthesis;	IPR013021; IPR016040;	"Myo-inositol-1-phosphate synthase, GAPDH-like; NAD(P)-binding domain; "
TERG_01844	hypothetical protein
TERG_01852	hypothetical protein
TERG_01856	CMGC/SRPK protein kinase
TERG_01857	Mitochondrial import inner membrane translocase subunit tim9	nucleus										K17777			IPR004217;	Tim10/DDP family zinc finger;
TERG_01858	S-	cytoplasm	metabolic process; single-organism process;	single-organism metabolic process; organic substance metabolic process;	ethanol oxidation; organic hydroxy compound metabolic process; alcohol metabolic process; oxidation-reduction process; small molecule metabolic process; ethanol metabolic process; primary alcohol metabolic process;				catalytic activity; binding;	ion binding; oxidoreductase activity;	oxidoreductase activity, acting on CH-OH group of donors; oxidoreductase activity, acting on the CH-OH group of donors, NAD or NADP as acceptor; transition metal ion binding; metal ion binding; cation binding; zinc ion binding; S-(hydroxymethyl)glutathione dehydrogenase activity;	K00121	frmA; S-(hydroxymethyl)glutathione dehydrogenase / alcohol dehydrogenase [EC:1.1.1.284 1.1.1.1]	ko00830 Retinol metabolism; ko01130 Biosynthesis of antibiotics; ko00071 Fatty acid degradation; ko01110 Biosynthesis of secondary metabolites; ko01100 Metabolic pathways; ko05204 Chemical carcinogenesis; ko00350 Tyrosine metabolism; ko00680 Methane metabolism; ko00980 Metabolism of xenobiotics by cytochrome P450; ko01120 Microbial metabolism in diverse environments; ko01200 Carbon metabolism; ko…	IPR011032; IPR020843; IPR016040; IPR013154; IPR013149;	"GroES-like; Polyketide synthase, enoylreductase domain; NAD(P)-binding domain; Alcohol dehydrogenase, N-terminal; Alcohol dehydrogenase, C-terminal; "
TERG_01860	hypothetical protein
TERG_01861	hypothetical protein
TERG_01862	hypothetical protein
TERG_01864	Probable lysosomal cobalamin transporter	plasma membrane										K14617	LMBRD1; LMBR1 domain-containing protein 1	ko04977 Vitamin digestion and absorption;
TERG_01865	hypothetical protein	nucleus
TERG_01866	hypothetical protein
TERG_01868	serine/threonine protein kinase
TERG_01870	hypothetical protein
TERG_01871	Acetyl-CoA acetyltransferase, putative	mitochondria	metabolic process;						catalytic activity;	transferase activity;	transferase activity, transferring acyl groups; transferase activity, transferring acyl groups other than amino-acyl groups;	K00626	E2.3.1.9; acetyl-CoA C-acetyltransferase [EC:2.3.1.9]	ko01130 Biosynthesis of antibiotics; ko03460 Fanconi anemia pathway; ko00900 Terpenoid backbone biosynthesis; ko00380 Tryptophan metabolism; ko01200 Carbon metabolism; ko00620 Pyruvate metabolism; ko00650 Butanoate metabolism; ko00640 Propanoate metabolism; ko00310 Lysine degradation; ko00720 Carbon fixation pathways in prokaryotes; ko00362 Benzoate degradation; ko01110 Biosynthesis of secondary …	IPR016039; IPR020616; IPR020617;	"Thiolase-like; Thiolase, N-terminal; Thiolase, C-terminal; "
TERG_01872	hypothetical protein
TERG_01874	U5 snRNP component (116 kDa), putative	cytoplasm							catalytic activity; binding;	ion binding; hydrolase activity; organic cyclic compound binding; heterocyclic compound binding; carbohydrate derivative binding; small molecule binding;	nucleoside phosphate binding; nucleoside binding; hydrolase activity, acting on acid anhydrides; nucleotide binding; nucleoside-triphosphatase activity; ribonucleoside binding; pyrophosphatase activity; ribonucleotide binding; GTPase activity; purine ribonucleoside binding; anion binding; purine ribonucleotide binding; purine nucleoside binding; guanyl ribonucleotide binding; hydrolase activity, …	K12852	EFTUD2; 116 kDa U5 small nuclear ribonucleoprotein component	ko03040 Spliceosome;	IPR027417; IPR000795; IPR005517; IPR005225; IPR000640; IPR004161; IPR020568; IPR014721; IPR009022; IPR009000;	"P-loop containing nucleoside triphosphate hydrolase; Transcription factor, GTP-binding domain; Translation elongation factor EFG/EF2, domain IV; Small GTP-binding protein domain; Translation elongation factor EFG, V domain; Translation elongation factor EFTu-like, domain 2; Ribosomal protein S5 domain 2-type fold; Ribosomal protein S5 domain 2-type fold, subgroup; Elongation factor G, III-V doma…
TERG_01875	hypothetical protein
TERG_01876	Oxidoreductase, short-chain dehydrogenase/reductase family	cytoplasm							catalytic activity;	oxidoreductase activity;					IPR016040;	NAD(P)-binding domain;
TERG_01881	hypothetical protein	mitochondria
TERG_01882	Ribosome recycling factor, putative	mitochondria										K02838			IPR023584;	Ribosome recycling factor domain;
TERG_01883	hsp75-like protein	cytoplasm										K03283	HSPA1_8; heat shock 70kDa protein 1/8	ko04612 Antigen processing and presentation; ko04915 Estrogen signaling pathway; ko05164 Influenza A; ko04144 Endocytosis; ko05145 Toxoplasmosis; ko04141 Protein processing in endoplasmic reticulum; ko03040 Spliceosome; ko05169 Epstein-Barr virus infection; ko05162 Measles; ko05134 Legionellosis; ko04213 Longevity regulating pathway - multiple species; ko04010 MAPK signaling pathway;	IPR029048; IPR029047;	"Heat shock protein 70kD, C-terminal domain; Heat shock protein 70kD, peptide-binding domain; "
TERG_01884	hypothetical protein	nucleus							binding;	protein binding;					IPR001487;	Bromodomain;
TERG_01885	cyclin-dependent kinase regulatory subunit	nucleus	single-organism process; cellular process;	single-organism cellular process;	cell cycle;				molecular function regulator;	enzyme regulator activity;	kinase regulator activity; protein kinase regulator activity; cyclin-dependent protein serine/threonine kinase regulator activity;	K02219	CKS1; cyclin-dependent kinase regulatory subunit CKS1	ko05200 Pathways in cancer; ko05222 Small cell lung cancer; ko04111 Cell cycle - yeast;
TERG_01886	hypothetical protein	cytoplasm													IPR012336;	Thioredoxin-like fold;
TERG_01887	hypothetical protein
TERG_01890	hypothetical protein
TERG_01893	hypothetical protein	nucleus
TERG_01894	hypothetical protein
TERG_01895	Carboxypeptidase	cytoplasm	metabolic process;	primary metabolic process; organic substance metabolic process;	proteolysis; macromolecule metabolic process; protein metabolic process;				catalytic activity;	hydrolase activity;	carboxypeptidase activity; peptidase activity; exopeptidase activity; serine hydrolase activity; serine-type peptidase activity; peptidase activity, acting on L-amino acid peptides; serine-type carboxypeptidase activity; serine-type exopeptidase activity;	K01288			IPR029058;	Alpha/Beta hydrolase fold;
TERG_01896	hypothetical protein
TERG_01897	hypothetical protein
TERG_01898	hypothetical protein
TERG_01901	glycerol kinase	peroxisome	metabolic process; cellular process;	primary metabolic process; cellular metabolic process; organic substance metabolic process;	phosphorus metabolic process; alditol phosphate metabolic process; carbohydrate derivative metabolic process; organophosphate metabolic process; glycerol-3-phosphate metabolic process; carbohydrate metabolic process; phosphate-containing compound metabolic process;				catalytic activity;	transferase activity;	glycerol kinase activity; kinase activity; phosphotransferase activity, alcohol group as acceptor; transferase activity, transferring phosphorus-containing groups;	K00864	glpK; glycerol kinase [EC:2.7.1.30]	ko00561 Glycerolipid metabolism; ko01100 Metabolic pathways; ko04626 Plant-pathogen interaction; ko03320 PPAR signaling pathway;	IPR018485; IPR018484;	"Carbohydrate kinase, FGGY, C-terminal; Carbohydrate kinase, FGGY, N-terminal; "
TERG_01902	Phosphotransferase enzyme family protein	nucleus													IPR002575; IPR011009;	Aminoglycoside phosphotransferase; Protein kinase-like domain;
TERG_01905	AMP deaminase	nucleus	single-organism process; metabolic process; cellular process;	biosynthetic process; cellular metabolic process; organic substance metabolic process; single-organism cellular process; nitrogen compound metabolic process; primary metabolic process; single-organism metabolic process;	cellular aromatic compound metabolic process; purine ribonucleoside monophosphate metabolic process; ribonucleoside monophosphate biosynthetic process; phosphate-containing compound metabolic process; heterocycle metabolic process; aromatic compound biosynthetic process; nucleobase-containing compound metabolic process; nucleoside phosphate metabolic process; cellular nitrogen compound metabolic …				catalytic activity;	deaminase activity;		K01490	AMPD; AMP deaminase [EC:3.5.4.6]	ko00230 Purine metabolism; ko01130 Biosynthesis of antibiotics; ko01110 Biosynthesis of secondary metabolites; ko01100 Metabolic pathways;	IPR001365; IPR032466;	Adenosine/AMP deaminase domain; Metal-dependent hydrolase;
TERG_01906	hypothetical protein
TERG_01909	Ribonuclease P complex subunit Pop2, putative	cytoplasm	metabolic process; cellular process;	nitrogen compound metabolic process; primary metabolic process; cellular metabolic process; organic substance metabolic process;	RNA processing; ncRNA processing; cellular aromatic compound metabolic process; organic cyclic compound metabolic process; RNA metabolic process; tRNA metabolic process; nucleic acid metabolic process; heterocycle metabolic process; nucleobase-containing compound metabolic process; tRNA processing; cellular macromolecule metabolic process; gene expression; cellular nitrogen compound metabolic pro…				catalytic activity;	hydrolase activity;	ribonuclease activity; hydrolase activity, acting on ester bonds; nuclease activity;	K03539	RPP1; ribonuclease P/MRP protein subunit RPP1 [EC:3.1.26.5]	ko03008 Ribosome biogenesis in eukaryotes; ko03013 RNA transport;	IPR016195;	Polymerase/histidinol phosphatase-like;
TERG_01910	hypothetical protein
TERG_01911	NmrA family transcriptional regulator, putative	mitochondria													IPR016040; IPR008030;	NAD(P)-binding domain; NmrA-like domain;
TERG_01914	hypothetical protein
TERG_01919	serine/threonine protein kinase
TERG_01920	hypothetical protein
TERG_01924	hypothetical protein	nucleus
TERG_01925	hypothetical protein
TERG_01926	5'/3'-nucleotidase SurE
TERG_01927	RING finger protein	nucleus							binding;	protein binding; ion binding;	cation binding; metal ion binding; zinc ion binding; transition metal ion binding;	K10601	SYVN1; E3 ubiquitin-protein ligase synoviolin [EC:2.3.2.27]	ko04141 Protein processing in endoplasmic reticulum; ko04120 Ubiquitin mediated proteolysis;	IPR001841; IPR013083; IPR024766;	"Zinc finger, RING-type; Zinc finger, RING/FYVE/PHD-type; Zinc finger, RING-H2-type; "
TERG_01928	hypothetical protein
TERG_01936	hypothetical protein
TERG_01937	Short chain dehydrogenase family protein	cytoplasm							catalytic activity;	oxidoreductase activity;					IPR016040;	NAD(P)-binding domain;
TERG_01940	Small nuclear ribonucleoprotein SmG, putative	cyto_nucl	metabolic process; cellular process; cellular component organization or biogenesis;	cellular component biogenesis; cellular component organization; cellular metabolic process; organic substance metabolic process; nitrogen compound metabolic process; primary metabolic process;	ribonucleoprotein complex biogenesis; ribonucleoprotein complex assembly; cellular aromatic compound metabolic process; mRNA splicing, via spliceosome; RNA splicing, via transesterification reactions with bulged adenosine as nucleophile; heterocycle metabolic process; ribonucleoprotein complex subunit organization; nucleobase-containing compound metabolic process; cellular component assembly; mac…	macromolecular complex; cell; organelle;	organelle part; cell part; ribonucleoprotein complex; membrane-bounded organelle;	intracellular organelle; intracellular organelle part; intracellular part; spliceosomal complex; intracellular membrane-bounded organelle; nucleus; intracellular; intracellular ribonucleoprotein complex; nuclear part;				K11099	SNRPG; small nuclear ribonucleoprotein G	ko03040 Spliceosome;	IPR001163; IPR010920;	"LSM domain, eukaryotic/archaea-type; LSM domain; "
TERG_01942	sn-1,2-diacylglycerol cholinephosphotransferase	plasma membrane	single-organism process; metabolic process; cellular process;	single-organism cellular process; biosynthetic process; primary metabolic process; cellular metabolic process; organic substance metabolic process; single-organism metabolic process;	single-organism biosynthetic process; phospholipid biosynthetic process; cellular lipid metabolic process; organic substance biosynthetic process; phosphate-containing compound metabolic process; cellular biosynthetic process; lipid biosynthetic process; organophosphate biosynthetic process; phosphorus metabolic process; organophosphate metabolic process; phospholipid metabolic process; lipid met…	membrane;			catalytic activity;	transferase activity;	phosphotransferase activity, for other substituted phosphate groups; transferase activity, transferring phosphorus-containing groups;	K00993	EPT1; ethanolaminephosphotransferase [EC:2.7.8.1]	ko00564 Glycerophospholipid metabolism; ko00565 Ether lipid metabolism; ko01110 Biosynthesis of secondary metabolites; ko00440 Phosphonate and phosphinate metabolism; ko01100 Metabolic pathways;
TERG_01943	1-aminocyclopropane-1-carboxylate deaminase	cytoplasm	metabolic process;	nitrogen compound metabolic process; catabolic process; organic substance metabolic process;	organic substance catabolic process; organonitrogen compound catabolic process; amine catabolic process; amine metabolic process; organonitrogen compound metabolic process;				catalytic activity; binding;	organic cyclic compound binding; heterocyclic compound binding; ion binding; deaminase activity; hydrolase activity; cofactor binding;	1-aminocyclopropane-1-carboxylate deaminase activity; anion binding; pyridoxal phosphate binding; hydrolase activity, acting on carbon-nitrogen (but not peptide) bonds;	K01505	E3.5.99.7; 1-aminocyclopropane-1-carboxylate deaminase [EC:3.5.99.7]	ko00270 Cysteine and methionine metabolism;	IPR001926;	Tryptophan synthase beta subunit-like PLP-dependent enzyme;
TERG_01947	hypothetical protein
TERG_01949	hypothetical protein	cyto_nucl
TERG_01952	40S ribosomal protein S15	nucleus	metabolic process; cellular process;	nitrogen compound metabolic process; biosynthetic process; primary metabolic process; cellular metabolic process; organic substance metabolic process;	peptide metabolic process; peptide biosynthetic process; cellular protein metabolic process; cellular amide metabolic process; organonitrogen compound biosynthetic process; organic substance biosynthetic process; cellular biosynthetic process; cellular nitrogen compound biosynthetic process; cellular macromolecule biosynthetic process; cellular macromolecule metabolic process; cellular nitrogen c…	macromolecular complex; cell; organelle;	organelle part; non-membrane-bounded organelle; cell part; ribonucleoprotein complex;	ribosome; intracellular organelle; intracellular non-membrane-bounded organelle; small ribosomal subunit; intracellular organelle part; cytoplasm; intracellular part; ribosomal subunit; intracellular; intracellular ribonucleoprotein complex; cytoplasmic part;	binding; structural molecule activity;	organic cyclic compound binding; heterocyclic compound binding; structural constituent of ribosome;	RNA binding; nucleic acid binding;	K02958	RP-S15e; small subunit ribosomal protein S15e	ko03010 Ribosome;	IPR023575;	"Ribosomal protein S19, superfamily; "
TERG_01954	hypothetical protein	nucleus
TERG_01955	YjeF domain protein	cytoplasm							catalytic activity;	lyase activity;	hydro-lyase activity; ADP-dependent NAD(P)H-hydrate dehydratase activity; carbon-oxygen lyase activity;	K17757			IPR029056;	Ribokinase-like;
TERG_01956	hypothetical protein
TERG_01959	RNA polymerase Rpb1 C-terminal repeat domain protein	nucleus
TERG_01964	cystathionine gamma-lyase	cytoplasm	cysteine biosynthetic proces; 'de novo' L-methionine biosynthetic process			cytoplasm			cystathionine gamma-lyase activity; L-cysteine desulfhydrase activity	organic cyclic compound binding; heterocyclic compound binding; ion binding; cofactor binding;	anion binding; pyridoxal phosphate binding;	K01758	CTH; cystathionine gamma-lyase [EC:4.4.1.1]	ko00270 Cysteine and methionine metabolism; ko01130 Biosynthesis of antibiotics; ko01230 Biosynthesis of amino acids; ko01100 Metabolic pathways; ko03022 Basal transcription factors; ko00450 Selenocompound metabolism;	IPR015424; IPR015422; IPR015421;	"Pyridoxal phosphate-dependent transferase; Pyridoxal phosphate-dependent transferase, major region, subdomain 2; Pyridoxal phosphate-dependent transferase, major region, subdomain 1; "
TERG_01965	DNA-directed RNA polymerase
TERG_01966	hypothetical protein
TERG_01969	hypothetical protein
TERG_01972	hypothetical protein
TERG_01973	mRNA cleavage and polyadenylation specificity factor complex subunit (Pta1), putative	nucleus										K06100	SYMPK; symplekin	ko03015 mRNA surveillance pathway; ko04530 Tight junction;
TERG_01974	COP9 signalosome subunit 8 (CsnH), putative	cytoskeleton										K12181			IPR033464;	CSN8/PSMD8/EIF3K;
TERG_01976	Dynein intermediate chain, putative	nucleus							binding;	protein binding;		K10415	"DYNC1I; dynein intermediate chain, cytosolic"""	ko05132 Salmonella infection; ko04145 Phagosome; ko04962 Vasopressin-regulated water reabsorption;	IPR017986; IPR015943;	WD40-repeat-containing domain; WD40/YVTN repeat-like-containing domain;
TERG_01978	Mannosyltransferase PMTI	plasma membrane	single-organism process; metabolic process; cellular process;	single-organism cellular process; biosynthetic process; primary metabolic process; cellular metabolic process; organic substance metabolic process; single-organism metabolic process;	protein glycosylation; macromolecule glycosylation; glycoprotein biosynthetic process; cellular protein metabolic process; glycoprotein metabolic process; organic substance biosynthetic process; cellular biosynthetic process; carbohydrate derivative biosynthetic process; cellular macromolecule biosynthetic process; cellular macromolecule metabolic process; carbohydrate derivative metabolic proces…	membrane;			catalytic activity;	transferase activity;	transferase activity, transferring glycosyl groups; mannosyltransferase activity; transferase activity, transferring hexosyl groups;	K00728	POMT; dolichyl-phosphate-mannose-protein mannosyltransferase [EC:2.4.1.109]	ko00514 Other types of O-glycan biosynthesis;	IPR032421; IPR003342; IPR016093;	"Protein O-mannosyl-transferase, C-terminal four TM domain; Glycosyl transferase family 39/83; MIR motif; "
TERG_01979	Pirin, putative	extracellular										K06911			IPR008778; IPR011051; IPR014710; IPR003829;	"Pirin, C-terminal domain; RmlC-like cupin domain; RmlC-like jelly roll fold; Pirin, N-terminal domain; "
TERG_01981	hypothetical protein	extracellular
TERG_01983	Misfolded glycoproteins degradation protein Yos9, putative	mitochondria										K10088	OS9; protein OS-9	ko04141 Protein processing in endoplasmic reticulum;	IPR009011; IPR012913;	Mannose-6-phosphate receptor binding domain; Glucosidase II beta subunit-like;
TERG_01984	Cytoskeleton assembly control protein Sla1, putative	nucleus							binding;	protein binding; binding, bridging;	identical protein binding; protein binding, bridging; cytoskeletal protein binding; ubiquitin binding; ubiquitin-like protein binding;	K20046			IPR001452; IPR007131;	"SH3 domain; SLA1 homology domain 1, SHD1; "
TERG_01986	Fe-S protein assembly co-chaperone HscB	mitochondria	cellular process; cellular component organization or biogenesis;	cellular component biogenesis; protein folding; cellular component organization;	protein complex subunit organization; cellular component assembly; macromolecular complex assembly; protein complex biogenesis; protein complex assembly; protein oligomerization; macromolecular complex subunit organization;				binding;	protein binding;	chaperone binding;	K04082			IPR009073; IPR001623;	"Co-chaperone HscB, C-terminal oligomerisation domain; DnaJ domain; "
TERG_01988	hypothetical protein
TERG_01991	Sulfonate biosynthesis enzyme, putative	mitochondria							catalytic activity;						IPR013785;	Aldolase-type TIM barrel;
TERG_01994	OPT family oligopeptide transporter
TERG_01997	Noc1p protein, putative	nucleus							binding;	organic cyclic compound binding; heterocyclic compound binding; ion binding;	transition metal ion binding; nucleic acid binding; metal ion binding; cation binding; zinc ion binding;				IPR001878; IPR032108; IPR000938;	"Zinc finger, CCHC-type; CLIP1, zinc knuckle; CAP Gly-rich domain; "
TERG_01998	3-hydroxyanthranilate 3,4-dioxygenase	cytoplasm	single-organism process; metabolic process;	single-organism metabolic process;	oxidation-reduction process;				catalytic activity; binding;	ion binding; oxidoreductase activity;	oxidoreductase activity, acting on single donors with incorporation of molecular oxygen, incorporation of two atoms of oxygen; iron ion binding; oxidoreductase activity, acting on single donors with incorporation of molecular oxygen; transition metal ion binding; dioxygenase activity; metal ion binding; cation binding; 3-hydroxyanthranilate 3,4-dioxygenase activity;	K00452	"HAAO; 3-hydroxyanthranilate 3,4-dioxygenase [EC:1.13.11.6]"""	ko00380 Tryptophan metabolism; ko01100 Metabolic pathways;	IPR011051; IPR014710;	RmlC-like cupin domain; RmlC-like jelly roll fold;
TERG_01999	RNA-3'-phosphate cyclase family protein	nucleus	cellular component organization or biogenesis; rRNA processing	cellular component biogenesis;	ribosome biogenesis; ribonucleoprotein complex biogenesis;	nucleus	organelle part; non-membrane-bounded organelle; cell part; membrane-bounded organelle;	intracellular organelle; intracellular non-membrane-bounded organelle; intracellular organelle part; nuclear lumen; intracellular part; nucleolus; intracellular membrane-bounded organelle; nucleus; intracellular organelle lumen; intracellular; organelle lumen; nuclear part;	catalytic activity; endoribonuclease activity;			K11108	RCL1; RNA 3'-terminal phosphate cyclase-like protein	ko03008 Ribosome biogenesis in eukaryotes;	IPR013791; IPR023797; IPR013792;	"RNA 3'-terminal phosphate cyclase, insert domain; RNA 3'-terminal phosphate cyclase domain; RNA 3'-terminal phosphate cyclase/enolpyruvate transferase, alpha/beta; "
TERG_02002	Pre-mRNA splicing helicase, putative	cyto_nucl							binding;	ion binding; protein binding; organic cyclic compound binding; heterocyclic compound binding; carbohydrate derivative binding; small molecule binding;	ATP binding; nucleoside phosphate binding; nucleoside binding; nucleotide binding; ribonucleoside binding; ribonucleotide binding; nucleic acid binding; purine ribonucleoside binding; anion binding; purine ribonucleotide binding; adenyl ribonucleotide binding; adenyl nucleotide binding; purine nucleoside binding; purine nucleotide binding; purine ribonucleoside triphosphate binding;	K12854	SNRNP200; pre-mRNA-splicing helicase BRR2 [EC:3.6.4.13]	ko03040 Spliceosome;	IPR011991; IPR011545; IPR004179; IPR014756; IPR027417; IPR014001; IPR001650; IPR000008;	"Winged helix-turn-helix DNA-binding domain; DEAD/DEAH box helicase domain; Sec63 domain; Immunoglobulin E-set; P-loop containing nucleoside triphosphate hydrolase; Helicase superfamily 1/2, ATP-binding domain; Helicase, C-terminal; C2 domain; "
TERG_02004	Ureidoglycolate hydrolase, putative	mitochondria	metabolic process; cellular process;	nitrogen compound metabolic process; cellular metabolic process; organic substance metabolic process; catabolic process;	allantoin catabolic process; organic cyclic compound metabolic process; cellular amide metabolic process; allantoin metabolic process; cellular amide catabolic process; organic substance catabolic process; cellular nitrogen compound catabolic process; organonitrogen compound catabolic process; heterocycle metabolic process; organic cyclic compound catabolic process; cellular catabolic process; ce…				catalytic activity;	lyase activity; hydrolase activity;	ureidoglycolate lyase activity; carbon-nitrogen lyase activity; ureidoglycolate hydrolase activity; hydrolase activity, acting on carbon-nitrogen (but not peptide) bonds, in linear amidines; amidine-lyase activity; hydrolase activity, acting on carbon-nitrogen (but not peptide) bonds;	K01483	allA; ureidoglycolate lyase [EC:4.3.2.3]	ko00230 Purine metabolism; ko01100 Metabolic pathways;	IPR024060; IPR011051;	Ureidoglycolate lyase domain; RmlC-like cupin domain;
TERG_02006	Golgi membrane protein (Rer1), putative	plasma membrane				membrane;	membrane part;	intrinsic component of membrane; integral component of membrane;
TERG_02011	hypothetical protein
TERG_02016	Autophagy related lipase Atg15, putative	extracellular	single-organism process; metabolic process;	primary metabolic process; single-organism metabolic process; organic substance metabolic process;	lipid metabolic process;							K17900	ATG15; lipase ATG15 [EC:3.1.1.3]	ko00561 Glycerolipid metabolism; ko01100 Metabolic pathways;	IPR002921; IPR029058;	Fungal lipase-like domain; Alpha/Beta hydrolase fold;
TERG_02018	hypothetical protein
TERG_02021	Ribosome biogenesis protein Noc4, putative	nucleus	ribosome biogenesis; rRNA processing			nucleus			RNA binding; nucleic acid binding;			K14771			IPR005612; IPR016024;	CCAAT-binding factor; Armadillo-type fold;
TERG_02022	hypothetical protein
TERG_02023	hypothetical protein
TERG_02024	hypothetical protein	cytoplasm
TERG_02029	hypothetical protein
TERG_02032	ATP synthase subunit alpha, mitochondrial	mitochondria	single-organism process; metabolic process; cellular process; localization;	biosynthetic process; cellular metabolic process; establishment of localization; single-organism cellular process; single-organism metabolic process; organic substance metabolic process; single-organism localization; nitrogen compound metabolic process; primary metabolic process;	nucleoside metabolic process; purine nucleoside metabolic process; purine ribonucleoside monophosphate metabolic process; nucleotide metabolic process; nucleoside biosynthetic process; purine ribonucleoside biosynthetic process; ribonucleoside monophosphate biosynthetic process; phosphate-containing compound metabolic process; ribose phosphate biosynthetic process; carbohydrate derivative biosynt…	membrane; macromolecular complex; cell;	membrane part; cell part; protein complex;	proton-transporting ATP synthase complex, catalytic core F(1); membrane protein complex; intracellular; proton-transporting two-sector ATPase complex; proton-transporting two-sector ATPase complex, catalytic domain; intracellular part; proton-transporting ATP synthase complex;	catalytic activity; binding; transporter activity;	substrate-specific transporter activity; hydrolase activity; organic cyclic compound binding; heterocyclic compound binding; ion binding; carbohydrate derivative binding; transmembrane transporter activity; small molecule binding;	ATPase coupled ion transmembrane transporter activity; nucleoside phosphate binding; primary active transmembrane transporter activity; hydrolase activity, acting on acid anhydrides; ATPase activity, coupled to transmembrane movement of ions, rotational mechanism; monovalent inorganic cation transmembrane transporter activity; hydrogen ion transmembrane transporter activity; substrate-specific tr…	K02132	ATPeF1A; F-type H+-transporting ATPase subunit alpha	ko05010 Alzheimer's disease; ko00190 Oxidative phosphorylation; ko01100 Metabolic pathways; ko05016 Huntington's disease; ko05012 Parkinson's disease;	IPR000793; IPR004100; IPR000194; IPR027417; IPR023366; IPR033732;	"ATP synthase, alpha subunit, C-terminal; ATPase, F1/V1/A1 complex, alpha/beta subunit, N-terminal domain; ATPase, F1/V1/A1 complex, alpha/beta subunit, nucleotide-binding domain; P-loop containing nucleoside triphosphate hydrolase; ATP synthase subunit alpha-like domain; ATP synthase, F1 complex, alpha subunit nucleotide-binding domain; "
TERG_02033	hypothetical protein
TERG_02034	RNA polymerase II subunit 7	cytoplasm	metabolic process; cellular process;	nitrogen compound metabolic process; biosynthetic process; primary metabolic process; cellular metabolic process; organic substance metabolic process;	heterocycle biosynthetic process; cellular aromatic compound metabolic process; nucleic acid-templated transcription; nucleobase-containing compound biosynthetic process; organic cyclic compound metabolic process; RNA biosynthetic process; organic substance biosynthetic process; cellular biosynthetic process; RNA metabolic process; cellular macromolecule biosynthetic process; nucleic acid metabol…				catalytic activity; binding;	organic cyclic compound binding; heterocyclic compound binding; transferase activity;	nucleotidyltransferase activity; 5'-3' RNA polymerase activity; RNA polymerase activity; nucleic acid binding; DNA-directed 5'-3' RNA polymerase activity; transferase activity, transferring phosphorus-containing groups;	K03015	RPB7; DNA-directed RNA polymerase II subunit RPB7	ko00230 Purine metabolism; ko05169 Epstein-Barr virus infection; ko01100 Metabolic pathways; ko00240 Pyrimidine metabolism; ko05016 Huntington's disease; ko03020 RNA polymerase;	IPR012340; IPR003029; IPR005576;	"Nucleic acid-binding, OB-fold; S1 domain; RNA polymerase Rpb7, N-terminal; "
TERG_02035	hypothetical protein	nucleus													IPR032710;	NTF2-like domain;
TERG_02036	hypothetical protein
TERG_02037	RNA binding domain protein	mitochondria							binding;	organic cyclic compound binding; heterocyclic compound binding; small molecule binding;	nucleoside phosphate binding; nucleic acid binding; nucleotide binding;				IPR000504; IPR012677;	RNA recognition motif domain; Nucleotide-binding alpha-beta plait domain;
TERG_02039	2-hydroxyphytanoyl-CoA lyase, putative	extracellular							catalytic activity; binding;	ion binding; cofactor binding; sulfur compound binding; heterocyclic compound binding; organic cyclic compound binding; small molecule binding;	magnesium ion binding; vitamin binding; thiamine pyrophosphate binding; cation binding; metal ion binding; anion binding; coenzyme binding;	K12261	HACL1; 2-hydroxyacyl-CoA lyase 1 [EC:4.1.-.-]	ko04146 Peroxisome;	IPR012000; IPR029035; IPR029061; IPR012001; IPR011766;	"Thiamine pyrophosphate enzyme, central domain; DHS-like NAD/FAD-binding domain; Thiamin diphosphate-binding fold; Thiamine pyrophosphate enzyme, N-terminal TPP-binding domain; Thiamine pyrophosphate enzyme, C-terminal TPP-binding; "
TERG_02040	Oxidoreductin	nucleus	single-organism process; metabolic process;	single-organism metabolic process;	oxidation-reduction process;	organelle; cell;	cell part; membrane-bounded organelle;	intracellular membrane-bounded organelle; intracellular organelle; endoplasmic reticulum; intracellular; cytoplasm; endomembrane system; intracellular part; cytoplasmic part;	catalytic activity;	isomerase activity; oxidoreductase activity;	intramolecular oxidoreductase activity, transposing S-S bonds; oxidoreductase activity, acting on a sulfur group of donors; oxidoreductase activity, acting on a sulfur group of donors, disulfide as acceptor; intramolecular oxidoreductase activity; protein disulfide isomerase activity;
TERG_02042	hypothetical protein
TERG_02044	Autophagy protein Apg6, putative	nucleus	metabolic process; cellular process;	catabolic process; cellular metabolic process;	cellular catabolic process; autophagy;							K08334	BECN1; beclin 1	ko04215 Apoptosis - multiple species; ko04140 Regulation of autophagy;
TERG_02045	hypothetical protein
TERG_02047	COG1565 domain protein	nucleus													IPR029063;	S-adenosyl-L-methionine-dependent methyltransferase;
TERG_02050	hypothetical protein
TERG_02052	hypothetical protein
TERG_02053	hypothetical protein
TERG_02056	PX domain protein	nucleus							binding;	lipid binding; ion binding;	anion binding; phosphatidylinositol binding; phospholipid binding;				IPR001683;	Phox homologous domain;
TERG_02057	hypothetical protein
TERG_02058	Ribosome biogenesis protein, putative	nucleus	ribosome biogenesis; rRNA processing			nucleus			RNA binding; nucleic acid binding;			K14847			IPR007109;	Brix domain;
TERG_02059	Actin binding protein, putative	mitochondria				cell;	cell part;	intracellular;	binding;	protein binding;	actin binding; cytoskeletal protein binding;				IPR001452; IPR029006; IPR002108;	SH3 domain; ADF-H/Gelsolin-like domain; Actin-depolymerising factor homology domain;
TERG_02062	hypothetical protein
TERG_02064	Peroxisome biosynthesis protein (PAS8/Peroxin-6), putative	nucleus							binding;	ion binding; organic cyclic compound binding; heterocyclic compound binding; carbohydrate derivative binding; small molecule binding;	ATP binding; nucleoside phosphate binding; nucleoside binding; nucleotide binding; ribonucleoside binding; ribonucleotide binding; purine ribonucleoside binding; anion binding; purine ribonucleotide binding; adenyl ribonucleotide binding; adenyl nucleotide binding; purine nucleoside binding; purine nucleotide binding; purine ribonucleoside triphosphate binding;	K13339	PEX6; peroxin-6	ko04146 Peroxisome;	IPR003959; IPR003593; IPR027417;	"ATPase, AAA-type, core; AAA+ ATPase domain; P-loop containing nucleoside triphosphate hydrolase; "
TERG_02066	HypA protein, putative	cytoplasm													IPR025337;	Domain of unknown function DUF4243;
TERG_02067	hypothetical protein	mitochondria
TERG_02068	hypothetical protein
TERG_02071	Phosphoinositide phospholipase C	nucleus	single-organism process; signaling; response to stimulus; metabolic process; cellular process; biological regulation;	single organism signaling; cellular response to stimulus; primary metabolic process; organic substance metabolic process; regulation of biological process; cell communication; single-organism metabolic process;	regulation of cellular process; intracellular signal transduction; signal transduction; lipid metabolic process;				catalytic activity; binding;	protein binding; hydrolase activity;	phosphatidylinositol phospholipase C activity; phosphoric ester hydrolase activity; phospholipase C activity; hydrolase activity, acting on ester bonds; phospholipase activity; phosphoric diester hydrolase activity; lipase activity;				IPR000909; IPR017946; IPR000008; IPR001711;	"Phosphatidylinositol-specific phospholipase C, X domain; PLC-like phosphodiesterase, TIM beta/alpha-barrel domain; C2 domain; Phospholipase C, phosphatidylinositol-specific, Y domain; "
TERG_02073	succinate dehydrogenase [ubiquinone] flavoprotein subunit, mitochondrial	mitochondria	single-organism process; metabolic process; cellular process;	single-organism cellular process; primary metabolic process; cellular metabolic process; organic substance metabolic process; single-organism metabolic process;	tricarboxylic acid metabolic process; oxidation-reduction process; small molecule metabolic process; tricarboxylic acid cycle; cellular respiration; citrate metabolic process; generation of precursor metabolites and energy; aerobic respiration; energy derivation by oxidation of organic compounds; carboxylic acid metabolic process; electron transport chain; organic acid metabolic process; oxoacid …				catalytic activity; binding;	organic cyclic compound binding; heterocyclic compound binding; ion binding; cofactor binding; small molecule binding; oxidoreductase activity;	oxidoreductase activity, acting on the CH-CH group of donors; nucleoside phosphate binding; flavin adenine dinucleotide binding; anion binding; nucleotide binding; coenzyme binding;	K00234	SDHA; succinate dehydrogenase (ubiquinone) flavoprotein subunit [EC:1.3.5.1]	ko01130 Biosynthesis of antibiotics; ko01110 Biosynthesis of secondary metabolites; ko01100 Metabolic pathways; ko04932 Non-alcoholic fatty liver disease (NAFLD); ko00020 Citrate cycle (TCA cycle); ko01120 Microbial metabolism in diverse environments; ko01200 Carbon metabolism; ko05010 Alzheimer's disease; ko00190 Oxidative phosphorylation; ko05016 Huntington's disease; ko05012 Parkinson's diseas…	IPR027477; IPR003953; IPR015939; IPR023753;	"Succinate dehydrogenase/fumarate reductase flavoprotein, catalytic domain; FAD-dependent oxidoreductase 2, FAD binding domain; Fumarate reductase/succinate dehydrogenase flavoprotein-like, C-terminal; FAD/NAD(P)-binding domain; "
TERG_02076	hypothetical protein
TERG_02077	hypothetical protein	mitochondria										K17435
TERG_02079	hypothetical protein
TERG_02080	Glucosyltransferase	mitochondria				membrane; cell; organelle;	organelle part; membrane part; cell part; membrane-bounded organelle;	intracellular organelle; endoplasmic reticulum; nuclear outer membrane-endoplasmic reticulum membrane network; cytoplasm; intracellular organelle part; endomembrane system; intracellular part; intracellular membrane-bounded organelle; endoplasmic reticulum part; intracellular; endoplasmic reticulum membrane; cytoplasmic part;	catalytic activity;	transferase activity;	transferase activity, transferring glycosyl groups; transferase activity, transferring hexosyl groups;	K03848	"ALG6; alpha-1,3-glucosyltransferase [EC:2.4.1.267]"""	ko01100 Metabolic pathways; ko00510 N-Glycan biosynthesis;
TERG_02081	RNA binding protein	nucleus							binding;	organic cyclic compound binding; heterocyclic compound binding; small molecule binding;	nucleoside phosphate binding; nucleic acid binding; nucleotide binding;	K11294	NCL; nucleolin	ko05130 Pathogenic Escherichia coli infection;	IPR000504; IPR012677; IPR034272;	"RNA recognition motif domain; Nucleotide-binding alpha-beta plait domain; Gar2, RNA recognition motif 1; "
TERG_02082	hypothetical protein
TERG_02084	Ran GTPase activating protein 1 (RNA1 protein)	cytoplasm							binding;	protein binding;		K14319	RANGAP1; Ran GTPase-activating protein 1	ko03013 RNA transport;	IPR032675;	"Leucine-rich repeat domain, L domain-like; "
TERG_02086	Exocyst complex component Sec10, putative	plasma membrane	single-organism process; localization; cellular process;	single-organism localization; single-organism cellular process; establishment of localization;	transport; secretion by cell; vesicle-mediated transport; vesicle docking; membrane docking; exocytosis; single-organism transport; secretion;	cell;	cell part;	intracellular part; intracellular; cytoplasm;				K19984
TERG_02092	hypothetical protein
TERG_02099	hypothetical protein
TERG_02100	cytidine deaminase	cytoplasm	single-organism process; metabolic process; cellular process;	cellular metabolic process; organic substance metabolic process; single-organism cellular process; nitrogen compound metabolic process; primary metabolic process; single-organism metabolic process; catabolic process;	nucleoside metabolic process; pyrimidine nucleoside catabolic process; cellular aromatic compound metabolic process; cellular nitrogen compound catabolic process; ribonucleoside catabolic process; heterocycle metabolic process; pyrimidine nucleoside metabolic process; nucleobase-containing compound metabolic process; organic cyclic compound catabolic process; cellular catabolic process; pyrimidin…				catalytic activity; binding;	ion binding; deaminase activity; hydrolase activity;	hydrolase activity, acting on carbon-nitrogen (but not peptide) bonds, in cyclic amidines; cytidine deaminase activity; transition metal ion binding; cation binding; metal ion binding; zinc ion binding; hydrolase activity, acting on carbon-nitrogen (but not peptide) bonds;	K01489	cdd; cytidine deaminase [EC:3.5.4.5]	ko00983 Drug metabolism - other enzymes; ko01100 Metabolic pathways; ko00240 Pyrimidine metabolism;	IPR002125; IPR016193;	"Cytidine and deoxycytidylate deaminases, zinc-binding; Cytidine deaminase-like; "
TERG_02101	Mitochondrial ornithine carrier protein (AmcA), putative	mitochondria										K15114			IPR023395;	Mitochondrial carrier domain;
TERG_02102	hypothetical protein
TERG_02103	hypothetical protein
TERG_02105	hypothetical protein
TERG_02107	Protein phosphatase type 1 complex subunit Hex2/Reg1, putative	nucleus
TERG_02108	ELMO/CED-12 family protein	cyto_nucl							binding;						IPR006816; IPR011989; IPR024574; IPR016024; IPR001849;	ELMO domain; Armadillo-like helical; Domain of unknown function DUF3361; Armadillo-type fold; Pleckstrin homology domain;
TERG_02112	hypothetical protein	extracellular													IPR011024;	Gamma-crystallin-related;
TERG_02113	TIGR01456 family HAD hydrolase	cyto_nucl													IPR023214;	HAD-like domain;
TERG_02116	PX domain protein	nucleus							binding;	lipid binding; ion binding;	anion binding; phosphatidylinositol binding; phospholipid binding;				IPR024554; IPR001683;	"Domain of unknown function DUF3818, PX-associated; Phox homologous domain; "
TERG_02117	hypothetical protein
TERG_02118	hypothetical protein	extracellular
TERG_02122	Phenylacetyl-CoA ligase, putative	cytoplasm	metabolic process;						catalytic activity;						IPR025110; IPR000873;	AMP-binding enzyme C-terminal domain; AMP-dependent synthetase/ligase;
TERG_02123	hypothetical protein
TERG_02126	26S proteasome regulatory subunit S5A	cytoplasm										K03029	PSMD4; 26S proteasome regulatory subunit N10	ko05169 Epstein-Barr virus infection; ko03050 Proteasome;	IPR002035;	"von Willebrand factor, type A; "
TERG_02127	hypothetical protein
TERG_02129	Ubiquitin conjugating enzyme, putative	nucleus										K10585	UBE2Z; ubiquitin-conjugating enzyme E2 Z [EC:2.3.2.23]	ko04120 Ubiquitin mediated proteolysis;	IPR016135; IPR000608;	Ubiquitin-conjugating enzyme/RWD-like; Ubiquitin-conjugating enzyme E2;
TERG_02134	hypothetical protein
TERG_02141	hypothetical protein
TERG_02142	hypothetical protein
TERG_02143	hypothetical protein
TERG_02144	Arsenite resistance protein Ars2, putative	nucleus							binding;	ion binding;	metal ion binding; cation binding;				IPR007042; IPR007087; IPR025239;	"Arsenite-resistance protein 2; Zinc finger, C2H2; Domain of unknown function DUF4187; "
TERG_02145	hypothetical protein
TERG_02146	Kinesin family protein	cyto_nucl	single-organism process; cellular process;	single-organism cellular process; microtubule-based process;	microtubule-based movement; movement of cell or subcellular component;				catalytic activity; binding;	hydrolase activity; protein binding; organic cyclic compound binding; heterocyclic compound binding; ion binding; carbohydrate derivative binding; small molecule binding;	motor activity; nucleoside phosphate binding; hydrolase activity, acting on acid anhydrides; cytoskeletal protein binding; pyrophosphatase activity; ribonucleotide binding; microtubule binding; purine ribonucleoside binding; anion binding; adenyl ribonucleotide binding; adenyl nucleotide binding; hydrolase activity, acting on acid anhydrides, in phosphorus-containing anhydrides; microtubule motor…	K10392			IPR008984; IPR022140; IPR027417; IPR022164; IPR000253; IPR032405; IPR001752; IPR001849; IPR011993;	SMAD/FHA domain; Kinesin-like KIF1-type; P-loop containing nucleoside triphosphate hydrolase; Kinesin-like; Forkhead-associated (FHA) domain; Kinesin-associated; Kinesin motor domain; Pleckstrin homology domain; PH domain-like;
TERG_02152	hypothetical protein
TERG_02157	hypothetical protein
TERG_02158	hypothetical protein
TERG_02160	hypothetical protein
TERG_02161	hypothetical protein
TERG_02163	HLH transcription factor (Hpa3), putative	nucleus							binding;	protein binding;	protein dimerization activity;				IPR011598;	"Myc-type, basic helix-loop-helix (bHLH) domain; "
TERG_02164	hypothetical protein
TERG_02166	Oxidoreductase, putative	cyto_nucl	single-organism process; metabolic process;	single-organism metabolic process;	oxidation-reduction process;				catalytic activity; binding;	ion binding; oxidoreductase activity; carbohydrate binding; small molecule binding;	vitamin binding; iron ion binding; L-ascorbic acid binding; organic acid binding; oxidoreductase activity, acting on paired donors, with incorporation or reduction of molecular oxygen; monosaccharide binding; oxidoreductase activity, acting on paired donors, with incorporation or reduction of molecular oxygen, 2-oxoglutarate as one donor, and incorporation of one atom each of oxygen into both don…				IPR006620; IPR019601; IPR005123;	"Prolyl 4-hydroxylase, alpha subunit; Oxoglutarate/iron-dependent oxygenase, C-terminal degradation domain; Oxoglutarate/iron-dependent dioxygenase; "
TERG_02167	hypothetical protein
TERG_02168	hypothetical protein
TERG_02169	hypothetical protein
TERG_02172	Cytochrome P450 monooxygenase, putative	endoplasmic reticulum	single-organism process; metabolic process;	single-organism metabolic process;	oxidation-reduction process;				catalytic activity; binding;	organic cyclic compound binding; heterocyclic compound binding; ion binding; oxidoreductase activity;	heme binding; iron ion binding; transition metal ion binding; cation binding; metal ion binding; oxidoreductase activity, acting on paired donors, with incorporation or reduction of molecular oxygen; tetrapyrrole binding;
TERG_02175	hypothetical protein
TERG_02176	Small nuclear ribonucleoprotein (LSM2), putative	mitochondria	metabolic process; cellular process;	nitrogen compound metabolic process; primary metabolic process; cellular metabolic process; organic substance metabolic process;	RNA processing; cellular aromatic compound metabolic process; organic cyclic compound metabolic process; mRNA processing; RNA metabolic process; nucleic acid metabolic process; heterocycle metabolic process; nucleobase-containing compound metabolic process; cellular macromolecule metabolic process; gene expression; cellular nitrogen compound metabolic process; macromolecule metabolic process; mRN…							K12621	LSM2; U6 snRNA-associated Sm-like protein LSm2	ko03018 RNA degradation; ko03040 Spliceosome;	IPR001163; IPR010920;	"LSM domain, eukaryotic/archaea-type; LSM domain; "
TERG_02177	hypothetical protein
TERG_02179	hypothetical protein
TERG_02181	hypothetical protein
TERG_02185	hypothetical protein
TERG_02190	mitochondrial thiamine pyrophosphate carrier	mitochondrion	mitochondrial transport			mitochondrion			thiamine pyrophosphate transmembrane transporter activity
TERG_02194	Exonuclease, putative	nucleus							binding;	organic cyclic compound binding; heterocyclic compound binding;	nucleic acid binding;	K14570	REX1; RNA exonuclease 1 [EC:3.1.-.-]	ko03008 Ribosome biogenesis in eukaryotes;	IPR012337; IPR013520;	"Ribonuclease H-like domain; Exonuclease, RNase T/DNA polymerase III; "
TERG_02195	hypothetical protein
TERG_02197	Nitrilase, putative	cytoplasm	metabolic process;	nitrogen compound metabolic process;					catalytic activity;	hydrolase activity;	hydrolase activity, acting on carbon-nitrogen (but not peptide) bonds;				IPR003010;	Carbon-nitrogen hydrolase;
TERG_02199	Glutamate carboxypeptidase, putative	cytoplasm										K01301			IPR003137; IPR007484;	PA domain; peptidase M28;
TERG_02202	NADH-ubiquinone oxidoreductase 12 kDa subunit, mitochondrial	cytoplasm
TERG_02203	pH-signalling protein PalC	cytoplasm													IPR004328;	BRO1 domain;
TERG_02205	hypothetical protein
TERG_02206	hypothetical protein
TERG_02208	hypothetical protein
TERG_02209	Deoxyribodipyrimidine photo-lyase Phr1, putative	mitochondria										K01669			IPR014729; IPR006050; IPR005101;	"Rossmann-like alpha/beta/alpha sandwich fold; DNA photolyase, N-terminal; Cryptochrome/DNA photolyase, FAD-binding domain; "
TERG_02210	DUF636 domain protein	mitochondria	metabolic process;						catalytic activity;	lyase activity;	carbon-sulfur lyase activity;				IPR006913; IPR011057;	Glutathione-dependent formaldehyde-activating enzyme/centromere protein V; Mss4-like;
TERG_02216	glutamate-tRNA ligase
TERG_02218	F1F0 ATP synthase assembly protein Atp11, putative	mitochondria	cellular process; cellular component organization or biogenesis;	cellular component biogenesis; cellular component organization;	protein complex subunit organization; cellular component assembly; macromolecular complex assembly; protein complex biogenesis; protein complex assembly; macromolecular complex subunit organization;	organelle; cell;	cell part; membrane-bounded organelle;	intracellular membrane-bounded organelle; intracellular organelle; intracellular; cytoplasm; intracellular part; mitochondrion; cytoplasmic part;				K07555
TERG_02219	BEM46 family protein	cytoplasm										K06889			IPR029058; IPR022742;	"Alpha/Beta hydrolase fold; Serine aminopeptidase, S33; "
TERG_02221	proteasome component PRE3	cytoplasm	metabolic process; cellular process;	primary metabolic process; cellular metabolic process; organic substance metabolic process; catabolic process;	proteolysis involved in cellular protein catabolic process; cellular macromolecule catabolic process; cellular protein catabolic process; cellular protein metabolic process; organic substance catabolic process; protein catabolic process; macromolecule catabolic process; cellular macromolecule metabolic process; cellular catabolic process; proteolysis; protein metabolic process; macromolecule meta…	macromolecular complex; cell;	catalytic complex; cell part; protein complex;	proteasome complex; intracellular; proteasome core complex; intracellular part; peptidase complex; endopeptidase complex;	catalytic activity;	hydrolase activity;	endopeptidase activity; threonine-type endopeptidase activity; peptidase activity; threonine-type peptidase activity; peptidase activity, acting on L-amino acid peptides;	K02738	PSMB6; 20S proteasome subunit beta 1 [EC:3.4.25.1]	ko03050 Proteasome;	IPR029055;	"Nucleophile aminohydrolases, N-terminal; "
TERG_02223	hypothetical protein
TERG_02224	Rho guanyl nucleotide exchange factor, putative	nucleus	single-organism process; signaling; response to stimulus; cellular process; biological regulation;	single organism signaling; cellular response to stimulus; regulation of biological process; cell communication;	regulation of cellular process; regulation of intracellular signal transduction; intracellular signal transduction; regulation of signaling; regulation of Ras protein signal transduction; signal transduction; regulation of cell communication; regulation of response to stimulus; regulation of signal transduction; regulation of Rho protein signal transduction; regulation of small GTPase mediated si…				molecular function regulator;	guanyl-nucleotide exchange factor activity;	Ras guanyl-nucleotide exchange factor activity; Rho guanyl-nucleotide exchange factor activity;				IPR027267; IPR000219;	Arfaptin homology (AH) domain/BAR domain; Dbl homology (DH) domain;
TERG_02226	hypothetical protein
TERG_02227	arginine-tRNA ligase
TERG_02229	hypothetical protein
TERG_02230	Mitochondrial ribosomal protein DAP3, putative	mitochondrion	translation; mitochondrial translation			mitochondrion			structural constituent of ribosome			K17408
TERG_02232	Rho GTPase activator (Bem2), putative	nucleus	single-organism process; signaling; response to stimulus; cellular process; biological regulation;	single organism signaling; cellular response to stimulus; regulation of biological process; cell communication;	regulation of cellular process; signal transduction;										IPR008936; IPR000198;	Rho GTPase activation protein; Rho GTPase-activating protein domain;
TERG_02234	Rab geranylgeranyltransferase, beta subunit	cytoplasm	metabolic process; cellular process;	primary metabolic process; cellular metabolic process; organic substance metabolic process;	protein geranylgeranylation; cellular protein metabolic process; prenylation; protein prenylation; cellular macromolecule metabolic process; cellular protein modification process; protein metabolic process; macromolecule metabolic process; protein modification process; macromolecule modification;				catalytic activity;	transferase activity;	protein geranylgeranyltransferase activity; transferase activity, transferring alkyl or aryl (other than methyl) groups; prenyltransferase activity; protein prenyltransferase activity; Rab geranylgeranyltransferase activity;	K05956			IPR008930;	Terpenoid cyclases/protein prenyltransferase alpha-alpha toroid;
TERG_02243	hypothetical protein
TERG_02245	hypothetical protein
TERG_02249	Phenylacetyl-CoA ligase, putative	cytoplasm	metabolic process;						catalytic activity;						IPR025110; IPR000873;	AMP-binding enzyme C-terminal domain; AMP-dependent synthetase/ligase;
TERG_02250	Cyclopropane-fatty-acyl-phospholipid synthase, putative	plasma membrane													IPR029063;	S-adenosyl-L-methionine-dependent methyltransferase;
TERG_02251	hypothetical protein
TERG_02252	Tropomyosin, putative	cytoplasm, cytoskeleton	actin filament organization; establishment of cell polarity			cytoplasm, cytoskeleton			actin lateral binding			K17945
TERG_02253	hypothetical protein
TERG_02255	hypothetical protein	nucleus
TERG_02256	hypothetical protein	cytoplasm	metabolic process; cellular process;	nitrogen compound metabolic process; biosynthetic process; primary metabolic process; cellular metabolic process; organic substance metabolic process;	heterocycle biosynthetic process; cellular aromatic compound metabolic process; nucleic acid-templated transcription; nucleobase-containing compound biosynthetic process; organic cyclic compound metabolic process; RNA biosynthetic process; organic substance biosynthetic process; cellular biosynthetic process; RNA metabolic process; cellular macromolecule biosynthetic process; nucleic acid metabol…	organelle; cell;	cell part; membrane-bounded organelle;	intracellular membrane-bounded organelle; intracellular organelle; nucleus; intracellular; intracellular part;	catalytic activity;	transferase activity;	DNA-directed 5'-3' RNA polymerase activity; nucleotidyltransferase activity; 5'-3' RNA polymerase activity; RNA polymerase activity; transferase activity, transferring phosphorus-containing groups;
TERG_02257	DNA-directed RNA polymerase 1A	nucleus	transcription			nucleus			binding; DNA-directed 5'-3' RNA polymerase activity
TERG_02260	hypothetical protein
TERG_02262	hypothetical protein
TERG_02263	hypothetical protein
TERG_02264	Aldehyde reductase I (ARI), putative	cytoplasm	single-organism process; metabolic process;	single-organism metabolic process;	oxidation-reduction process;				catalytic activity;	oxidoreductase activity;					IPR023210;	NADP-dependent oxidoreductase domain;
TERG_02266	hypothetical protein
TERG_02267	hypothetical protein
TERG_02269	hypothetical protein
TERG_02272	hypothetical protein
TERG_02273	hypothetical protein
TERG_02275	hypothetical protein
TERG_02277	Transcription initiation factor IIA subunit 2	cytoplasm	metabolic process; cellular process;	biosynthetic process; cellular metabolic process; organic substance metabolic process; nitrogen compound metabolic process; primary metabolic process;	cellular aromatic compound metabolic process; nucleic acid-templated transcription; DNA-templated transcription, initiation; heterocycle metabolic process; aromatic compound biosynthetic process; nucleobase-containing compound metabolic process; cellular nitrogen compound metabolic process; macromolecule metabolic process; macromolecule biosynthetic process; transcription initiation from RNA poly…	macromolecular complex; cell; organelle; membrane-enclosed lumen;	organelle part; catalytic complex; cell part; membrane-bounded organelle; protein complex;	intracellular organelle; DNA-directed RNA polymerase complex; nuclear DNA-directed RNA polymerase complex; transferase complex, transferring phosphorus-containing groups; intracellular organelle part; RNA polymerase complex; nuclear lumen; intracellular part; transferase complex; transcription factor complex; nuclear transcription factor complex; DNA-directed RNA polymerase II, holoenzyme; intrac…				K03123	TFIIA2; transcription initiation factor TFIIA small subunit	ko03022 Basal transcription factors; ko05203 Viral carcinogenesis;	IPR015872; IPR009083;	"Transcription initiation factor IIA, gamma subunit, N-terminal; Transcription factor IIA, helical; "
TERG_02282	hypothetical protein
TERG_02283	hypothetical protein
TERG_02285	Poly(A)+ RNA transport protein (UbaA), putative	cytoplasm	metabolic process; cellular process;	primary metabolic process; cellular metabolic process; organic substance metabolic process;	cellular macromolecule metabolic process; cellular protein metabolic process; cellular protein modification process; macromolecule metabolic process; protein metabolic process; macromolecule modification; protein modification process;				catalytic activity;	ligase activity;	small protein activating enzyme activity; ligase activity, forming carbon-sulfur bonds;	K03178	UBE1; ubiquitin-activating enzyme E1 [EC:6.2.1.45]	ko04120 Ubiquitin mediated proteolysis; ko05012 Parkinson's disease;	IPR032418; IPR019572; IPR000594; IPR016040; IPR032420; IPR018965;	"Ubiquitin-activating enzyme E1, FCCH domain; Ubiquitin-activating enzyme, catalytic cysteine domain; THIF-type NAD/FAD binding fold; NAD(P)-binding domain; Ubiquitin-activating enzyme E1, four-helix bundle; Ubiquitin-activating enzyme E1, C-terminal; "
TERG_02286	Cell wall biogenesis protein/glutathione transferase, putative	mitochondria							binding;	protein binding;		K07393			IPR010987; IPR004045; IPR012336;	"Glutathione S-transferase, C-terminal-like; Glutathione S-transferase, N-terminal; Thioredoxin-like fold; "
TERG_02287	Calcium dependent mitochondrial carrier protein, putative	cyto_nucl	localization;	establishment of localization;	transport; transmembrane transport;				binding;	ion binding;	cation binding; metal ion binding; calcium ion binding;	K14684			IPR023395; IPR011992; IPR002048;	Mitochondrial carrier domain; EF-hand domain pair; EF-hand domain;
TERG_02288	hypothetical protein
TERG_02291	hypothetical protein
TERG_02292	hypothetical protein
TERG_02294	hypothetical protein
TERG_02295	hypothetical protein
TERG_02298	hypothetical protein
TERG_02300	hypothetical protein
TERG_02301	hypothetical protein	nucleus
TERG_02302	hypothetical protein	nucleus
TERG_02303	Ankyrin repeat protein	cyto_nucl							binding;	protein binding;					IPR020683;	Ankyrin repeat-containing domain;
TERG_02306	hypothetical protein
TERG_02307	hypothetical protein
TERG_02308	hypothetical protein
TERG_02309	serine/threonine protein kinase
TERG_02311	GNAT family acetyltransferase, putative	cytoskeleton													IPR016181;	Acyl-CoA N-acyltransferase;
TERG_02312	Sister chromatid cohesion protein Dcc1, putative	nucleus
TERG_02313	Aminonitrophenyl propanediol resistance protein	mitochondria										K05533	ANP1; mannan polymerase II complex ANP1 subunit [EC:2.4.1.-]	ko00513 Various types of N-glycan biosynthesis; ko01100 Metabolic pathways;	IPR029044;	Nucleotide-diphospho-sugar transferases;
TERG_02315	Extracellular aspartic endopeptidase, putative	extracellular	metabolic process;	primary metabolic process; organic substance metabolic process;	proteolysis; macromolecule metabolic process; protein metabolic process;				catalytic activity;	hydrolase activity;	endopeptidase activity; peptidase activity; aspartic-type endopeptidase activity; peptidase activity, acting on L-amino acid peptides; aspartic-type peptidase activity;				IPR034163; IPR033121; IPR021109;	Aspergillopepsin-like catalytic domain; peptidase family A1 domain; Aspartic peptidase domain;
TERG_02317	phosphatidylethanolamine N-methyltransferase	plasma membrane	metabolic process; single-organism process; cellular process;	single-organism metabolic process; single-organism cellular process; primary metabolic process; cellular metabolic process; organic substance metabolic process;	phosphorus metabolic process; organophosphate metabolic process; cellular lipid metabolic process; phospholipid metabolic process; phosphate-containing compound metabolic process; lipid metabolic process;				catalytic activity;	transferase activity;	S-adenosylmethionine-dependent methyltransferase activity; methyltransferase activity; phosphatidylethanolamine N-methyltransferase activity; transferase activity, transferring one-carbon groups; N-methyltransferase activity;	K16369	CHO2; phosphatidylethanolamine N-methyltransferase [EC:2.1.1.17]	ko00564 Glycerophospholipid metabolism; ko01110 Biosynthesis of secondary metabolites; ko01100 Metabolic pathways;
TERG_02323	hypothetical protein
TERG_02325	T-complex protein 1 subunit alpha	cytoplasm	cellular process;	protein folding;					binding;	ion binding; protein binding; organic cyclic compound binding; heterocyclic compound binding; carbohydrate derivative binding; small molecule binding;	ATP binding; nucleoside phosphate binding; nucleoside binding; nucleotide binding; ribonucleoside binding; ribonucleotide binding; purine ribonucleoside binding; anion binding; purine ribonucleotide binding; unfolded protein binding; adenyl ribonucleotide binding; adenyl nucleotide binding; purine nucleoside binding; purine nucleotide binding; purine ribonucleoside triphosphate binding;	K09493			IPR027410; IPR027409; IPR027413;	TCP-1-like chaperonin intermediate domain; GroEL-like apical domain; GroEL-like equatorial domain;
TERG_02326	hypothetical protein
TERG_02327	rRNA biogenesis protein RRP5, putative	nucleus	metabolic process; cellular process;	nitrogen compound metabolic process; primary metabolic process; cellular metabolic process; organic substance metabolic process;	RNA processing; cellular aromatic compound metabolic process; organic cyclic compound metabolic process; RNA metabolic process; nucleic acid metabolic process; heterocycle metabolic process; nucleobase-containing compound metabolic process; cellular macromolecule metabolic process; gene expression; cellular nitrogen compound metabolic process; macromolecule metabolic process;				binding;	organic cyclic compound binding; heterocyclic compound binding; protein binding;	nucleic acid binding;	K14792			IPR012340; IPR003029; IPR011990; IPR022967;	"Nucleic acid-binding, OB-fold; S1 domain; Tetratricopeptide-like helical domain; RNA-binding domain, S1; "
TERG_02334	hypothetical protein
TERG_02338	hypothetical protein
TERG_02339	Phosphopantothenate-cysteine ligase, putative	nucleus										K01922	PPCS; phosphopantothenate-cysteine ligase [EC:6.3.2.5]	ko00770 Pantothenate and CoA biosynthesis; ko01100 Metabolic pathways;	IPR007085;	"DNA/pantothenate metabolism flavoprotein, C-terminal; "
TERG_02343	pantothenate kinase	mitochondria	single-organism process; metabolic process; cellular process;	biosynthetic process; cellular metabolic process; single-organism cellular process; single-organism metabolic process; organic substance metabolic process; nitrogen compound metabolic process; primary metabolic process;	cofactor biosynthetic process; nucleoside metabolic process; purine nucleoside metabolic process; nucleotide metabolic process; purine ribonucleoside biosynthetic process; nucleoside biosynthetic process; phosphate-containing compound metabolic process; ribose phosphate biosynthetic process; carbohydrate derivative biosynthetic process; purine nucleoside bisphosphate metabolic process; nucleoside…				catalytic activity; binding;	ion binding; organic cyclic compound binding; heterocyclic compound binding; carbohydrate derivative binding; transferase activity; small molecule binding;	ATP binding; nucleoside phosphate binding; phosphotransferase activity, alcohol group as acceptor; nucleoside binding; nucleotide binding; pantothenate kinase activity; ribonucleoside binding; kinase activity; ribonucleotide binding; purine ribonucleoside binding; anion binding; purine ribonucleotide binding; adenyl ribonucleotide binding; adenyl nucleotide binding; purine nucleoside binding; tra…	K09680	coaW; type II pantothenate kinase [EC:2.7.1.33]	ko00770 Pantothenate and CoA biosynthesis; ko01100 Metabolic pathways;
TERG_02345	hypothetical protein
TERG_02355	hypothetical protein
TERG_02359	hypothetical protein
TERG_02360	hypothetical protein
TERG_02361	hypothetical protein
TERG_02364	hypothetical protein
TERG_02367	hypothetical protein
TERG_02369	MFS transporter	cell membrane	transport; inorganic phosphate transmembrane transport			cell membrane			inorganic phosphate transmembrane transporter activity
TERG_02371	hypothetical protein
TERG_02372	hypothetical protein
TERG_02373	UPF0016 domain protein	plasma membrane
TERG_02374	Myb-like DNA-binding protein, putative	nucleus							binding;	organic cyclic compound binding; heterocyclic compound binding;	DNA binding; nucleic acid binding;				IPR009057;	Homeobox domain-like;
TERG_02375	Annexin ANXC4	nucleus							binding;	ion binding; lipid binding;	calcium-dependent phospholipid binding; phospholipid binding; cation binding; metal ion binding; anion binding; calcium ion binding;
TERG_02377	40S ribosomal protein S9	nucleus	metabolic process; cellular process;	nitrogen compound metabolic process; biosynthetic process; primary metabolic process; cellular metabolic process; organic substance metabolic process;	peptide metabolic process; peptide biosynthetic process; cellular protein metabolic process; cellular amide metabolic process; organonitrogen compound biosynthetic process; organic substance biosynthetic process; cellular biosynthetic process; cellular nitrogen compound biosynthetic process; cellular macromolecule biosynthetic process; cellular macromolecule metabolic process; cellular nitrogen c…	macromolecular complex; cell; organelle;	organelle part; non-membrane-bounded organelle; cell part; ribonucleoprotein complex;	intracellular organelle; ribosome; intracellular non-membrane-bounded organelle; small ribosomal subunit; cytoplasm; intracellular organelle part; intracellular part; intracellular; ribosomal subunit; intracellular ribonucleoprotein complex; cytoplasmic part;	binding; structural molecule activity;	organic cyclic compound binding; heterocyclic compound binding; structural constituent of ribosome;	RNA binding; nucleic acid binding; rRNA binding;	K02997	RP-S9e; small subunit ribosomal protein S9e	ko03010 Ribosome;	IPR001912; IPR002942;	"Ribosomal protein S4/S9, N-terminal; RNA-binding S4 domain; "
TERG_02378	hypothetical protein
TERG_02379	hypothetical protein
TERG_02380	hypothetical protein
TERG_02381	Putative vacuolar protein sorting-associated protein TDA6	extracellular
TERG_02382	Septin	nucleus							binding;	ion binding; organic cyclic compound binding; heterocyclic compound binding; carbohydrate derivative binding; small molecule binding;	nucleoside phosphate binding; nucleoside binding; nucleotide binding; ribonucleoside binding; ribonucleotide binding; purine ribonucleoside binding; anion binding; purine ribonucleotide binding; purine nucleoside binding; guanyl ribonucleotide binding; guanyl nucleotide binding; GTP binding; purine nucleotide binding; purine ribonucleoside triphosphate binding;				IPR027417; IPR030379;	P-loop containing nucleoside triphosphate hydrolase; Septin-type guanine nucleotide-binding (G) domain;
TERG_02383	Mitochondrial carrier protein (Rim2), putative	mitochondrion	localization; establishment of localization; mitochondrial transport	establishment of localization;	transport; transmembrane transport;	mitochondrion			transporter activity			K15116			IPR023395;	Mitochondrial carrier domain;
TERG_02384	hypothetical protein
TERG_02385	hypothetical protein
TERG_02390	WD repeat protein	nucleus							binding;	protein binding;		K11801			IPR017986; IPR015943;	WD40-repeat-containing domain; WD40/YVTN repeat-like-containing domain;
TERG_02396	mRNA splicing protein, putative	nucleus							binding;	organic cyclic compound binding; heterocyclic compound binding; ion binding;	transition metal ion binding; nucleic acid binding; metal ion binding; cation binding; zinc ion binding;	K12819	SLU7; pre-mRNA-processing factor SLU7	ko03040 Spliceosome;	IPR001878; IPR021715;	"Zinc finger, CCHC-type; Pre-mRNA splicing Prp18-interacting factor; "
TERG_02397	60S ribosomal protein L37
TERG_02399	hypothetical protein
TERG_02402	hypothetical protein
TERG_02404	40S ribosomal protein S4	mitochondria	metabolic process; cellular process;	nitrogen compound metabolic process; biosynthetic process; primary metabolic process; cellular metabolic process; organic substance metabolic process;	peptide metabolic process; peptide biosynthetic process; cellular protein metabolic process; cellular amide metabolic process; organonitrogen compound biosynthetic process; organic substance biosynthetic process; cellular biosynthetic process; cellular nitrogen compound biosynthetic process; cellular macromolecule biosynthetic process; cellular macromolecule metabolic process; cellular nitrogen c…	organelle; macromolecular complex; cell;	cell part; ribonucleoprotein complex; non-membrane-bounded organelle;	ribosome; intracellular organelle; intracellular non-membrane-bounded organelle; intracellular; cytoplasm; intracellular part; intracellular ribonucleoprotein complex; cytoplasmic part;	binding; structural molecule activity;	organic cyclic compound binding; heterocyclic compound binding; structural constituent of ribosome;	RNA binding; nucleic acid binding;	K02987	RP-S4e; small subunit ribosomal protein S4e	ko03010 Ribosome;	IPR013845; IPR032277; IPR002942; IPR013843;	"Ribosomal protein S4e, central region; 40S ribosomal protein S4, C-terminal domain; RNA-binding S4 domain; Ribosomal protein S4e, N-terminal; "
TERG_02405	hypothetical protein
TERG_02408	hypothetical protein
TERG_02413	hypothetical protein
[truncated: 4,230 more rows]

## Sheet: Table S2B
Table S2B. The number of milRNAs correspoded to each target gene.
[truncated: 5,471 more rows]

[truncated: 1 more sheets: Table S2C]
